# Supplementary material for: Assessing Causal Relationship Between Human Blood Metabolites and Five Neurodegenerative Diseases With GWAS Summary Statistics
Source: Front Neurosci. 2021 Dec 9;15:680104. doi: 10.3389/fnins.2021.680104 (PMC8695771; doi:10.3389/fnins.2021.680104)
Supplement: Supplementary file 1 [file Table_1.xlsx]

## Sheet: Table S1
Table S1. Estimated heritability of five neurodegenerative diseases with LDSC
disease	h2	λ	λ1000	χ2	intercept	ratio
AD	0.011 (0.004)	1.06	1.0005	1.103	1.017 (0.005)	0.163 (0.052)
ALS	0.012 (0.005)	1.038	1.001	1.057	1.034 (0.004)	0.600 (0.071)
FTD	0.045 (0.034)	1.007	1.001	1.013	0.997 (0.007)	< 0
PD	0.013 (0.001)	1.065	1.001	1.124	0.983 (0.004)	< 0
MS	0.133 (0.011)	1.125	1.004	1.207	1.025 (0.007)	0.120 (0.034)
Note: AD: Alzheimer’s disease; ALS: amyotrophic lateral sclerosis; FTD: frontotemporal dementia; PD: Parkinson’s disease; MS: multiple sclerosis

## Sheet: Table S2
Table S2. Inverse-variance weighted Mendelian randomization estamites for all metabolites on the risk of the five NDDs
Metabolite ID	NDD	F		k	IVW analysis
		min	max		OR	Lower	Upper	P
M00053	AD	20.2445	77.8335	8	0.807811	0.673297	0.969199	0.0216411
M00054	AD	18.9429	47.4439	201	1.03227	0.96956	1.09904	0.320574
M00059	AD	19.7017	55.6594	7	0.981065	0.811476	1.1861	0.843495
M00060	AD	19.1354	80.978	217	0.991539	0.92958	1.05763	0.796339
M00063	AD	18.4344	39.0486	43	1.08818	1.00757	1.17524	0.031389
M00064	AD	20.032	46.475	6	1.16833	0.933657	1.46198	0.17386
M00513	AD	19.0779	33.3736	24	1.02051	0.909668	1.14485	0.729329
M00527	AD	19.5016	25.8701	13	0.95067	0.858097	1.05323	0.333142
M00542	AD	19.8757	25.8744	10	0.992289	0.972045	1.01295	0.461659
M00575	AD	19.8453	24.9889	7	1.02869	0.967926	1.09326	0.362556
M00577	AD	19.4919	23.7779	3	1.00527	0.878968	1.14973	0.938794
M00584	AD	19.5583	334.494	27	0.971029	0.92087	1.02392	0.277287
M00599	AD	19.6316	24.9931	12	1.04459	0.980409	1.11297	0.177534
M00606	AD	19.8607	65.7722	21	0.902748	0.804288	1.01326	0.0824974
M01105	AD	19.5016	29.7853	18	0.955714	0.875081	1.04378	0.313826
M01107	AD	19.3065	26.535	17	0.982445	0.944066	1.02238	0.383678
M01110	AD	19.7477	380.927	31	1.00785	0.955534	1.06303	0.773692
M01114	AD	19.6772	29.6661	15	0.990181	0.962366	1.0188	0.497298
M01121	AD	20.3544	59.031	8	0.941798	0.861101	1.03006	0.189519
M01123	AD	19.8261	50.0579	13	0.996601	0.983612	1.00976	0.610942
M01125	AD	18.7727	28.215	17	1.06737	0.932991	1.2211	0.342276
M01284	AD	19.0029	26.4829	18	1.02051	0.938746	1.10939	0.633747
M01299	AD	18.7727	57.1759	32	1.01577	0.918835	1.12293	0.759791
M01301	AD	19.7477	70.7386	25	1.04721	0.929167	1.18024	0.449674
M01302	AD	18.5926	30.5661	20	0.89666	0.763894	1.0525	0.18216
M01303	AD	19.6679	28.9857	16	1.05137	0.973871	1.13503	0.199761
M01336	AD	19.4499	39.5743	29	0.974687	0.896723	1.05943	0.546681
M01356	AD	19.9457	32.3388	16	1.01417	0.949394	1.08336	0.676132
M01358	AD	19.7477	87.8667	43	0.928882	0.867355	0.994773	0.0348718
M01359	AD	19.3547	32.8621	22	0.970922	0.892152	1.05665	0.494243
M01361	AD	19.8247	29.82	20	1.00375	0.934259	1.07841	0.918595
M01365	AD	19.2196	28.1145	26	0.97116	0.915982	1.02966	0.326807
M01444	AD	19.1875	31.632	16	1.0197	0.969639	1.07235	0.447498
M01493	AD	19.3547	27.6397	11	1.02053	0.9199	1.13217	0.701236
M01494	AD	19.4348	27.8708	24	1.11228	0.996598	1.24139	0.0575454
M01508	AD	18.7725	40.5703	27	0.983849	0.932307	1.03824	0.55311
M01558	AD	18.772	257.702	40	1.01014	0.946261	1.07834	0.762052
M01561	AD	19.3547	27.2458	10	0.964409	0.893957	1.04041	0.349099
M01564	AD	18.621	53.4842	46	1.02523	0.957619	1.0976	0.474141
M01572	AD	19.5583	27.1193	18	0.970241	0.888142	1.05993	0.503033
M01573	AD	19.5634	24.2788	13	0.952017	0.919954	0.985197	0.00490584
M01585	AD	19.257	29.0321	20	1.01878	0.877513	1.18278	0.807012
M01604	AD	19.5583	418.931	24	0.975814	0.895754	1.06303	0.575109
M01605	AD	19.7454	24.6468	9	1.01984	0.990912	1.04961	0.180866
M01638	AD	19.2781	26.9026	22	1.02449	0.949068	1.1059	0.535195
M01640	AD	19.7182	26.0999	14	1.00554	0.991792	1.01947	0.431772
M01642	AD	18.9429	31.632	34	1.04326	0.979024	1.11172	0.191497
M01644	AD	19.0779	32.7349	37	1.0554	0.982004	1.13428	0.1426
M01645	AD	19.2571	30.8558	34	1.01676	0.946885	1.0918	0.647208
M01649	AD	21.0012	45.5501	6	1.03424	0.813235	1.3153	0.783719
M01670	AD	19.5583	24.6243	10	0.87372	0.78219	0.975959	0.0168043
M01712	AD	19.0361	28.714	14	0.976763	0.92095	1.03596	0.433525
M01769	AD	18.7725	33.904	37	0.996115	0.925478	1.07214	0.917393
M01898	AD	19.2571	261.78	39	0.989843	0.938919	1.04353	0.704805
M02132	AD	18.7727	42.6216	47	1.0256	0.955859	1.10042	0.481755
M02137	AD	19.7737	27.9036	15	0.988445	0.94927	1.02924	0.573239
M02342	AD	19.3	26.0898	16	1.00989	0.957576	1.06506	0.716934
M02730	AD	19.4347	77.6795	21	0.982118	0.91207	1.05755	0.632699
M02734	AD	19.2569	32.2532	43	0.963857	0.898003	1.03454	0.307957
M03127	AD	19.3378	65.2676	24	0.994798	0.932719	1.06101	0.87395
M03141	AD	19.1792	79.9229	31	1.00638	0.949417	1.06677	0.830544
M03147	AD	19.945	25.9068	5	0.987381	0.874865	1.11437	0.837003
M11438	AD	20.227	26.5549	5	1.14893	0.940785	1.40312	0.173392
M12017	AD	19.0934	29.8179	15	0.993604	0.921679	1.07114	0.867089
M12035	AD	18.7727	30.8558	38	1.00841	0.940381	1.08136	0.814241
M12067	AD	18.7725	30.9327	26	0.942833	0.85442	1.04039	0.241301
M12129	AD	19.0946	34.6689	22	0.995559	0.935822	1.05911	0.887879
M12261	AD	19.5661	25.5906	12	0.98647	0.963995	1.00947	0.246652
M12593	AD	19.8826	30.566	25	1.06292	0.956789	1.18083	0.255564
M12626	AD	19.2689	25.2196	11	0.958735	0.856019	1.07378	0.466098
M12768	AD	19.4197	24.6745	22	1.01271	0.961797	1.06632	0.631309
M12774	AD	19.2571	72.2304	32	0.985813	0.919933	1.05641	0.685555
M15122	AD	19.0949	27.9312	17	0.992049	0.9277	1.06086	0.815531
M15140	AD	18.7727	76.7992	39	1.00454	0.942424	1.07074	0.889465
M15335	AD	19.9402	23.3208	13	0.972946	0.95245	0.993883	0.0115751
M15365	AD	19.1998	23.8637	14	0.953753	0.873308	1.04161	0.29224
M15488	AD	18.9429	33.2228	19	0.995839	0.866729	1.14418	0.953065
M15500	AD	19.2571	77.0284	229	1.00877	0.950579	1.07053	0.773235
M15506	AD	19.1354	29.152	24	0.913067	0.799608	1.04262	0.179144
M15630	AD	19.5186	1859.25	27	1.0111	0.995069	1.02739	0.175833
M15650	AD	19.2196	30.6662	8	0.966565	0.752455	1.2416	0.790106
M15676	AD	19.2571	67.8016	36	1.07508	1.00524	1.14977	0.0346346
M15677	AD	19.5897	25.0523	9	1.00781	0.972359	1.04455	0.670308
M15749	AD	19.5821	45.3222	16	0.980249	0.94214	1.0199	0.324125
M15958	AD	19.5427	22.5021	9	0.992202	0.928932	1.05978	0.815855
M15990	AD	19.1038	25.8825	18	0.986056	0.949647	1.02386	0.464471
M15996	AD	19.8517	24.1891	4	0.962213	0.879946	1.05217	0.398271
M16634	AD	19.8689	21.9235	9	0.994258	0.944833	1.04627	0.824815
M16816	AD	19.4147	24.2263	14	1.0188	0.95144	1.09092	0.593616
M16818	AD	19.5014	24.9929	11	1.00991	0.946381	1.07769	0.766186
M16821	AD	19.0945	28.4337	22	1.03555	0.977675	1.09685	0.233849
M16822	AD	19.0038	47.6817	19	1.05336	0.970419	1.14339	0.214097
M16823	AD	19.5192	23.7275	12	1.01653	0.999459	1.03389	0.0577892
M17805	AD	19.5311	23.2601	9	1.01473	0.939887	1.09553	0.708367
M17807	AD	19.531	40.752	23	0.968237	0.937951	0.999501	0.0465081
M17945	AD	19.0779	27.2641	36	1.01372	0.936765	1.09699	0.735162
M18283	AD	19.9986	27.0591	11	1.03119	0.986212	1.07822	0.17708
M18349	AD	19.4196	50.0281	21	1.02287	0.962718	1.08679	0.464587
M18357	AD	19.7133	25.2431	8	0.986409	0.946135	1.0284	0.519975
M18369	AD	19.4128	27.4009	34	1.06725	0.991776	1.14846	0.0819842
M18467	AD	19.7477	92.5505	12	0.97538	0.921778	1.0321	0.387363
M18474	AD	19.4008	32.3748	12	0.994869	0.981637	1.00828	0.4515
M18476	AD	20.051	23.8181	9	1.00387	0.976326	1.03218	0.785728
M18477	AD	20.463	24.2665	6	0.993156	0.970834	1.01599	0.553786
M18494	AD	19.4677	25.1297	13	1.01377	0.987349	1.0409	0.310106
M18497	AD	19.7988	25.8785	16	0.994935	0.978839	1.0113	0.541712
M18929	AD	19.2196	28.8143	12	0.978481	0.905066	1.05785	0.58461
M19323	AD	19.9362	29.2792	7	0.975072	0.906093	1.0493	0.500092
M19324	AD	19.8201	27.3847	6	1.01759	0.963262	1.07498	0.533375
M19362	AD	19.8712	28.1095	23	1.03811	0.948351	1.13635	0.41762
M19364	AD	18.9792	30.2385	20	1.04277	0.981918	1.10738	0.172216
M19368	AD	19.5578	26.1593	12	0.970111	0.889938	1.05751	0.490522
M19396	AD	19.5102	32.1237	8	1.01268	0.951829	1.07742	0.690237
M19414	AD	19.7449	25.2174	13	0.970814	0.909545	1.03621	0.373185
M19415	AD	20.3627	25.5176	5	1.00577	0.939039	1.07725	0.869485
M19934	AD	18.7727	50.8456	37	0.973223	0.916065	1.03395	0.379446
M20489	AD	18.9429	33.9042	34	1.01484	0.937787	1.09821	0.714706
M20675	AD	19.0949	190.797	37	0.931318	0.893567	0.970664	0.000750921
M21044	AD	19.2654	29.1521	18	1.0392	0.980593	1.1013	0.194215
M21047	AD	19.2782	33.7412	18	1.02484	0.928469	1.1312	0.626325
M21049	AD	19.7159	30.9313	14	1.00423	0.978238	1.03092	0.752308
M21127	AD	20.0779	24.624	11	1.0584	0.955973	1.17181	0.274411
M21184	AD	20.0145	36.8131	15	0.999775	0.959396	1.04185	0.99146
M21188	AD	19.4193	30.0375	27	0.97329	0.918316	1.03155	0.361413
M21630	AD	18.8839	401.067	26	1.03758	0.987479	1.09023	0.144008
M22030	AD	19.5573	76.218	19	0.937748	0.870941	1.00968	0.0882871
M22032	AD	19.2556	23.3529	16	1.01851	0.960499	1.08003	0.539822
M22116	AD	19.8999	41.0652	14	0.979948	0.888465	1.08085	0.685416
M22130	AD	19.6054	88.9396	19	1.04311	0.980102	1.11018	0.184265
M22138	AD	19.6023	69.4093	8	0.979766	0.918125	1.04555	0.537534
M22175	AD	19.7754	27.9498	6	0.984577	0.924292	1.04879	0.629696
M22177	AD	18.4843	32.3004	58	1.00625	0.957695	1.05726	0.805001
M22189	AD	19.1997	40.1001	10	0.944094	0.881775	1.01082	0.0987118
M22481	AD	19.0779	146.639	38	1.05554	1.00832	1.10498	0.0206297
M22548	AD	19.3546	29.2319	12	0.943811	0.853621	1.04353	0.259118
M22649	AD	19.5576	25.7383	12	1.00479	0.904083	1.11671	0.929393
M22842	AD	19.7977	22.2298	8	1.01471	0.988704	1.04139	0.270374
M24074	AD	19.4357	27.1587	19	0.994776	0.926634	1.06793	0.884979
M25459	AD	19.0779	81.9807	28	1.00812	0.965378	1.05275	0.714581
M25599	AD	19.2912	35.9887	22	1.00575	0.960799	1.0528	0.80592
M27256	AD	18.7726	25.5516	35	1.02714	0.942652	1.11921	0.540862
M27273	AD	19.9699	25.5677	12	1.00543	0.908596	1.11259	0.916471
M27278	AD	19.5142	159.437	21	1.03657	0.971255	1.10628	0.279396
M27447	AD	19.573	44.5292	15	1.00236	0.970696	1.03506	0.885584
M27513	AD	19.2918	30.7435	23	0.983924	0.935224	1.03516	0.531473
M27531	AD	19.7229	28.6774	19	1.00374	0.981495	1.02648	0.744202
M27672	AD	20.2886	24.9716	5	0.980919	0.914172	1.05254	0.592101
M27710	AD	19.4343	254.803	23	0.975141	0.950113	1.00083	0.0577601
M27716	AD	19.5337	23.9859	11	0.987217	0.95767	1.01768	0.406644
M27718	AD	19.7721	105.034	12	0.990759	0.944314	1.03949	0.704691
M27722	AD	19.54	23.185	8	1.03873	0.968439	1.11412	0.287847
M27738	AD	19.477	24.9932	17	1.00593	0.966498	1.04696	0.772077
M30805	AD	19.6065	28.3093	14	0.972256	0.924593	1.02238	0.272591
M31453	AD	19.5629	24.9931	19	1.00616	0.949835	1.06582	0.83454
M31522	AD	20.4386	22.5479	3	0.978482	0.92503	1.03502	0.447879
M31548	AD	19.8783	21.989	12	0.977372	0.939143	1.01716	0.260876
M31555	AD	19.5752	23.7591	13	0.988046	0.943939	1.03421	0.605753
M31591	AD	19.4242	47.4852	19	1.01023	0.981301	1.04001	0.492399
M31787	AD	19.8982	40.1551	15	1.00462	0.982462	1.02728	0.685265
M32197	AD	19.6988	51.7152	22	0.962325	0.905612	1.02259	0.215294
M32198	AD	19.3138	49.5481	19	0.962846	0.897223	1.03327	0.293145
M32315	AD	18.7727	122.264	38	0.999005	0.933647	1.06894	0.976989
M32319	AD	18.9291	21.7531	6	0.996801	0.933687	1.06418	0.923519
M32322	AD	20.1162	28.8444	4	1.03091	0.909411	1.16863	0.634255
M32328	AD	19.7052	453.695	23	0.99452	0.959392	1.03093	0.764576
M32338	AD	19.0044	686.615	36	0.970538	0.935003	1.00742	0.116114
M32339	AD	19.2571	59.3645	42	1.02229	0.946903	1.10367	0.572753
M32346	AD	19.5249	34.9217	14	1.00646	0.982203	1.03132	0.604843
M32348	AD	18.7727	67.5072	50	0.97798	0.916747	1.0433	0.499719
M32379	AD	19.6058	87.8619	13	1.01668	0.960019	1.07669	0.571803
M32388	AD	21.2738	31.6283	6	0.987997	0.924908	1.05539	0.719836
M32393	AD	19.686	33.5342	15	0.944859	0.85966	1.0385	0.239439
M32405	AD	19.3085	86.7603	16	1.03958	0.993361	1.08796	0.0943481
M32412	AD	19.5441	1912.98	52	1.00577	0.991773	1.01996	0.421049
M32418	AD	19.1354	63.9826	16	0.961179	0.918594	1.00574	0.0868055
M32425	AD	19.3547	50.5055	22	0.963568	0.928771	0.999668	0.0479665
M32452	AD	19.5404	67.5866	35	1.05965	0.994883	1.12863	0.0717751
M32489	AD	19.2571	28.0431	34	0.991092	0.915925	1.07243	0.824043
M32492	AD	18.7727	32.7349	46	1.02893	0.977609	1.08294	0.274643
M32497	AD	19.2498	273.749	33	0.993264	0.962524	1.02499	0.673482
M32504	AD	19.3289	56.8793	11	1.03798	0.981846	1.09733	0.188801
M32518	AD	19.4144	35.9902	37	0.952972	0.874902	1.03801	0.26935
M32549	AD	19.5283	56.1318	12	1.01059	0.979895	1.04225	0.503257
M32553	AD	19.6937	26.8788	16	0.998385	0.957795	1.04069	0.939146
M32557	AD	19.7596	23.6922	14	1.00419	0.961287	1.049	0.851208
M32560	AD	19.5981	25.9781	12	1.00914	0.985674	1.03316	0.448637
M32564	AD	19.5013	50.9387	19	0.996054	0.97316	1.01949	0.738919
M32578	AD	19.5507	104.209	19	1.00813	0.973708	1.04377	0.647825
M32586	AD	19.7817	23.5292	8	0.986923	0.943102	1.03278	0.570005
M32587	AD	19.8376	66.1625	14	0.983306	0.922839	1.04774	0.603138
M32593	AD	19.5359	26.3949	14	1.02213	0.977889	1.06837	0.332298
M32616	AD	19.5084	22.5195	10	0.985234	0.953965	1.01753	0.365999
M32632	AD	19.2571	50.7474	28	1.02846	0.98629	1.07243	0.18894
M32634	AD	19.2571	30.2392	41	1.08954	1.01083	1.17437	0.0249928
M32635	AD	19.5959	157.998	16	1.00762	0.956699	1.06125	0.774245
M32644	AD	19.5403	33.3735	38	1.05087	0.979962	1.1269	0.16391
M32651	AD	19.492	30.4424	23	0.985121	0.925565	1.04851	0.637531
M32654	AD	19.0044	108.964	29	0.953345	0.900718	1.00905	0.0991181
M32672	AD	19.2919	107.9	20	1.02258	0.981825	1.06502	0.281944
M32675	AD	19.4584	30.8784	21	0.995778	0.895761	1.10696	0.937562
M32691	AD	19.4822	29.7435	15	1.01925	0.989541	1.04986	0.206436
M32698	AD	19.3547	24.6817	16	0.909866	0.830521	0.996791	0.0424574
M32709	AD	19.42	95.4549	35	0.999025	0.958407	1.04136	0.963243
M32729	AD	19.0772	27.1412	42	0.955084	0.893948	1.0204	0.173325
M32735	AD	19.5888	54.5914	15	0.988724	0.958249	1.02017	0.477733
M32739	AD	19.8987	24.6602	11	0.926729	0.849026	1.01154	0.0885525
M32740	AD	18.7726	72.2303	52	0.926238	0.867018	0.989503	0.0230262
M32753	AD	19.5535	64.2495	12	0.950688	0.914122	0.988717	0.0115041
M32754	AD	19.5008	28.8353	15	1.00077	0.985063	1.01672	0.92439
M32755	AD	19.7242	27.7088	23	0.999391	0.961296	1.039	0.975506
M32757	AD	19.531	653.261	24	0.977776	0.955917	1.00014	0.051389
M32758	AD	19.5305	24.5942	10	0.989425	0.936876	1.04492	0.702598
M32759	AD	19.6064	25.2311	12	1.00132	0.959573	1.04488	0.95162
M32761	AD	19.6447	92.4738	22	1.03	0.987535	1.07429	0.168806
M32762	AD	19.5826	45.19	14	0.998975	0.973135	1.0255	0.938885
M32769	AD	19.6629	29.8865	6	1.01874	0.966238	1.07409	0.491659
M32786	AD	19.6216	57.7889	18	1.01082	0.982715	1.03973	0.454383
M32787	AD	19.6297	77.4174	14	0.990373	0.951132	1.03123	0.639073
M32795	AD	19.9573	114.481	13	1.02185	0.981257	1.06412	0.295997
M32800	AD	19.6744	27.8555	10	0.966	0.934208	0.998873	0.0427668
M32802	AD	19.6367	24.4108	7	0.998707	0.946734	1.05353	0.962141
M32808	AD	20.2435	137.94	19	0.975299	0.949713	1.00157	0.0651882
M32814	AD	19.2194	26.9816	14	1.01591	0.926497	1.11395	0.737045
M32836	AD	21.6682	49.5654	7	1.04047	0.989552	1.09401	0.121216
M32838	AD	19.7732	30.8226	11	0.993498	0.939512	1.05059	0.818987
M32846	AD	19.5573	1431.87	27	0.983053	0.971033	0.99522	0.0064636
M32847	AD	19.3286	23.8933	9	0.984227	0.919885	1.05307	0.644855
M32854	AD	19.4564	25.7169	7	1.01481	0.983637	1.04697	0.355732
M32855	AD	19.4763	400.619	24	0.977941	0.952883	1.00366	0.0921386
M32857	AD	19.7908	23.9777	8	0.990503	0.944546	1.0387	0.69382
M32863	AD	19.6839	24.8833	14	0.98474	0.967202	1.0026	0.093489
M32867	AD	18.7727	27.6933	18	0.972061	0.82711	1.14242	0.730899
M32869	AD	19.393	25.1381	18	1.00259	0.961838	1.04507	0.902764
M32910	AD	19.0779	817.065	57	1.00211	0.958717	1.04747	0.925604
M32980	AD	19.7962	104.132	12	1.01056	0.952434	1.07223	0.728238
M33084	AD	19.5385	54.1935	11	0.999844	0.965807	1.03508	0.992937
M33131	AD	19.346	55.1091	12	1.00171	0.956783	1.04874	0.941966
M33132	AD	18.7727	550.719	40	1.03057	0.969216	1.0958	0.336327
M33137	AD	19.8515	93.7284	15	1.00748	0.988511	1.02682	0.442152
M33138	AD	19.6994	31.3487	13	1.03657	0.977071	1.0997	0.233687
M33140	AD	19.3547	26.9819	9	1.0269	0.935117	1.1277	0.578397
M33144	AD	19.5527	172.397	9	1.01874	0.992905	1.04524	0.156594
M33150	AD	19.5981	25.7677	10	1.00302	0.985278	1.02108	0.740397
M33163	AD	19.7179	28.8432	19	0.984085	0.927533	1.04408	0.595216
M33165	AD	19.4023	62.8118	14	0.981069	0.94117	1.02266	0.366947
M33188	AD	20.0171	22.5105	3	0.967179	0.931058	1.0047	0.0857074
M33190	AD	19.6437	25.1716	22	1.00724	0.991671	1.02305	0.364086
M33192	AD	19.5068	24.8883	10	0.970078	0.941367	0.999665	0.0474991
M33194	AD	19.6387	23.8391	14	1.01594	0.994761	1.03756	0.141248
M33195	AD	20.1317	23.9459	7	0.982481	0.958821	1.00672	0.155299
M33197	AD	20.4653	24.8658	10	0.982181	0.961193	1.00363	0.102821
M33203	AD	19.5661	33.495	18	0.998924	0.985033	1.01301	0.880268
M33204	AD	19.4745	22.7184	13	1.0024	0.937125	1.07222	0.944364
M33221	AD	19.5692	25.2071	18	1.01084	0.973319	1.04981	0.576398
M33228	AD	18.8722	431.594	22	0.990619	0.946242	1.03708	0.686898
M33230	AD	18.9795	40.5925	15	0.962442	0.893587	1.0366	0.312122
M33250	AD	19.703	210.409	25	0.983504	0.962938	1.00451	0.122897
M33353	AD	19.5044	27.4635	21	0.99949	0.98426	1.01496	0.948102
M33359	AD	19.5662	25.5917	8	1.01364	0.989039	1.03885	0.279802
M33363	AD	19.9118	28.8544	10	1.03127	0.977566	1.08792	0.259155
M33364	AD	19.777	23.7301	10	0.917928	0.854668	0.98587	0.0187447
M33380	AD	19.0948	28.6459	36	1.0095	0.944729	1.07871	0.779939
M33389	AD	18.6209	27.2641	56	1.00681	0.943176	1.07474	0.838507
M33390	AD	19.5513	24.7411	15	0.981168	0.956682	1.00628	0.140358
M33391	AD	19.5061	31.0895	19	1.00797	1.00052	1.01549	0.0360787
M33408	AD	19.6022	26.9057	14	1.02923	1.00274	1.05642	0.0303329
M33415	AD	19.5579	327.235	18	0.976391	0.950212	1.00329	0.0848865
M33420	AD	19.5174	26.8002	11	1.03355	0.985825	1.08359	0.171269
M33422	AD	18.7726	34.0185	35	1.1034	1.0241	1.18884	0.00971587
M33441	AD	20.7593	217.503	16	0.962534	0.928089	0.998257	0.0399957
M33442	AD	19.2571	27.2642	24	1.0241	0.911486	1.15063	0.688655
M33443	AD	19.6913	22.3592	10	0.964227	0.888196	1.04677	0.384694
M33447	AD	19.3547	58.4428	13	0.981058	0.928475	1.03662	0.49624
M33453	AD	19.4569	30.1237	17	1.0327	0.981485	1.08659	0.215014
M33477	AD	18.9795	54.5807	44	0.964977	0.897902	1.03706	0.332104
M33488	AD	19.4839	26.7989	17	0.997751	0.963289	1.03345	0.900102
M33507	AD	19.4174	2912.88	38	0.996477	0.98495	1.00814	0.552116
M33508	AD	19.7881	226.604	20	0.990537	0.971813	1.00962	0.328851
M33509	AD	19.3545	24.9929	7	1.05413	0.974659	1.14008	0.18746
M33510	AD	19.6718	26.1831	24	1.00861	0.956451	1.06362	0.751575
M33515	AD	18.9793	44.4319	42	1.01264	0.941062	1.08966	0.736989
M33531	AD	19.5759	22.777	8	1.01499	0.972515	1.05933	0.495035
M33587	AD	19.545	27.3877	13	0.981434	0.924223	1.04219	0.540849
M33609	AD	19.4797	31.8941	20	0.995569	0.986141	1.00509	0.360256
M33610	AD	19.3091	32.509	31	1.00233	0.995544	1.00916	0.502216
M33627	AD	19.9633	23.0701	10	1.06882	0.992287	1.15125	0.0791389
M33633	AD	19.8479	25.718	11	0.97428	0.944844	1.00463	0.0959746
M33637	AD	19.4854	22.2098	9	1.02245	0.98584	1.06041	0.232747
M33638	AD	19.5799	23.4775	11	0.983741	0.940653	1.0288	0.473172
M33652	AD	19.5842	27.977	9	1.01645	0.977471	1.05699	0.41344
M33653	AD	19.4875	26.5822	13	0.992089	0.955694	1.02987	0.677021
M33658	AD	19.7551	27.3122	9	1.02361	0.989366	1.05904	0.178884
M33666	AD	19.1345	99.1368	30	1.0208	0.965037	1.07978	0.472609
M33675	AD	19.5238	25.4853	8	0.973703	0.928987	1.02057	0.266576
M33683	AD	19.5377	27.2081	11	1.01203	0.994185	1.0302	0.187666
M33751	AD	19.0762	28.3299	29	0.998275	0.993586	1.00299	0.472258
M33782	AD	19.9165	25.9066	13	1.0088	0.991803	1.02609	0.312131
M33801	AD	19.6468	84.5442	9	1.0245	0.984561	1.06606	0.232856
M33821	AD	19.3547	78.9909	21	0.963575	0.91812	1.01128	0.132329
M33822	AD	19.9553	22.1267	7	0.983153	0.905536	1.06742	0.685529
M33833	AD	19.5892	24.856	8	0.959095	0.906639	1.01459	0.145575
M33835	AD	19.8904	27.607	8	0.991825	0.965178	1.01921	0.554706
M33864	AD	19.6522	22.8623	9	0.997889	0.963957	1.03302	0.904691
M33871	AD	19.5685	33.6297	13	0.964065	0.923781	1.00611	0.0928726
M33877	AD	19.3462	32.6479	32	0.998788	0.992802	1.00481	0.692547
M33883	AD	19.4258	100.458	14	0.98133	0.962949	1.00006	0.0507409
M33884	AD	19.269	110.989	14	0.964432	0.926353	1.00408	0.0780705
M33885	AD	19.6254	25.3997	12	1.00419	0.979438	1.02957	0.742484
M33892	AD	19.4336	30.0506	32	1.00336	0.96236	1.04612	0.87465
M33901	AD	19.6254	192.55	22	0.993309	0.961457	1.02622	0.686418
M33910	AD	19.7169	25.1836	13	0.971566	0.928162	1.017	0.216052
M33936	AD	19.8552	347.728	22	1.02237	0.988941	1.05693	0.192112
M33937	AD	20.4738	129.039	16	0.999049	0.952938	1.04739	0.968529
M33939	AD	19.3078	24.4077	13	1.01162	0.926925	1.10406	0.795602
M33941	AD	19.4491	188.508	18	1.00477	0.966086	1.04501	0.812084
M33955	AD	19.42	30.2418	29	0.982413	0.8938	1.07981	0.712947
M33957	AD	19.49	24.801	9	1.02172	0.9541	1.09413	0.538536
M33960	AD	19.7287	25.8701	17	1.0461	0.961154	1.13854	0.296954
M33961	AD	19.6996	26.1488	12	0.974049	0.903115	1.05055	0.495511
M33968	AD	19.7247	39.4994	19	1.00178	0.965068	1.03988	0.92569
M33969	AD	19.5535	63.9825	9	1.0051	0.943185	1.07107	0.875493
M33971	AD	19.7687	22.6143	6	0.915118	0.827347	1.0122	0.0846635
M33972	AD	19.7187	30.5042	8	0.943236	0.869691	1.023	0.158256
M33973	AD	19.6069	28.2499	9	1.00777	0.956133	1.0622	0.773014
M34035	AD	19.5187	21.7075	4	0.994055	0.906705	1.08982	0.898889
M34040	AD	19.1648	726.344	19	1.01613	0.986617	1.04652	0.287319
M34062	AD	19.5404	37.9094	26	0.909534	0.82005	1.00878	0.072738
M34106	AD	19.6801	24.9181	14	1.01337	0.973714	1.05463	0.514422
M34112	AD	20.0067	24.2945	17	1.0001	0.969946	1.03119	0.994918
M34123	AD	19.2917	87.3258	19	1.02222	0.960592	1.0878	0.488479
M34214	AD	19.7187	134.933	22	0.967164	0.920829	1.01583	0.182569
M34221	AD	19.5989	58.761	14	1.00626	0.961328	1.0533	0.788835
M34244	AD	19.42	37.0258	23	1.00541	0.951396	1.06248	0.848206
M34245	AD	19.5124	26.0881	19	1.0364	0.992508	1.08224	0.105365
M34283	AD	19.1354	182.184	46	0.993	0.939803	1.04921	0.802535
M34289	AD	19.3804	26.1219	14	0.986921	0.931858	1.04524	0.653107
M34306	AD	19.0947	134.879	26	0.966713	0.9405	0.993656	0.0157918
M34314	AD	19.5769	35.0013	12	1.00711	0.979706	1.03527	0.614881
M34322	AD	19.0642	34.4595	38	1.00281	0.995933	1.00974	0.424042
M34327	AD	19.768	24.969	9	1.0113	0.987138	1.03605	0.362437
M34329	AD	19.3702	22.4293	11	0.999156	0.974634	1.0243	0.946919
M34336	AD	19.6467	27.7269	21	0.988622	0.965942	1.01183	0.333817
M34338	AD	19.4265	35.9015	44	1.00106	0.998414	1.00371	0.433084
M34339	AD	19.4634	27.6434	22	1.00651	0.992889	1.02031	0.350759
M34344	AD	19.6122	28.2084	12	0.984685	0.968378	1.00127	0.0700844
M34350	AD	19.3992	32.4714	15	0.993627	0.971344	1.01642	0.580598
M34359	AD	18.7722	50.5981	43	1.0274	0.967294	1.09124	0.379501
M34407	AD	20.0608	179.71	27	0.994634	0.956186	1.03463	0.789071
M34409	AD	19.4579	42.0408	7	1.02189	0.934661	1.11727	0.634264
M34416	AD	19.5013	46.4166	11	1.05929	1.00012	1.12197	0.0495328
M34419	AD	19.4958	26.5549	14	1.03562	0.955648	1.12228	0.393337
M34420	AD	19.6923	211.802	26	0.998635	0.985995	1.01144	0.833532
M34441	AD	19.4313	26.4584	17	0.972491	0.93893	1.00725	0.119546
M34453	AD	18.5511	25.1165	3	0.897997	0.679776	1.18627	0.448797
M34456	AD	19.2898	25.8672	23	0.979701	0.919827	1.04347	0.523861
M34469	AD	20.0298	28.7202	12	0.986523	0.94241	1.0327	0.560994
M34481	AD	19.8189	1169.83	21	0.997294	0.970144	1.0252	0.847403
M34499	AD	19.4896	24.3801	8	0.971286	0.942861	1.00057	0.054548
M34513	AD	19.4763	23.3467	11	0.959461	0.924933	0.995277	0.0268891
M34516	AD	19.557	29.2266	19	0.996507	0.989404	1.00366	0.337776
M34527	AD	19.3244	73.7376	16	0.996648	0.939057	1.05777	0.911976
M34530	AD	19.458	23.5884	9	0.998497	0.972607	1.02508	0.910681
M34533	AD	19.5305	67.126	17	0.967515	0.938507	0.99742	0.0334785
M34534	AD	19.3521	37.7194	14	0.993829	0.948898	1.04089	0.793147
M34535	AD	19.8505	22.845	6	0.998712	0.979505	1.0183	0.896471
M34539	AD	19.4171	36.5451	16	0.97875	0.928552	1.03166	0.423937
M34674	AD	19.4166	44.0358	12	0.995966	0.953969	1.03981	0.854092
M34732	AD	19.6584	19.7561	3	0.957936	0.825481	1.11164	0.571401
M34761	AD	20.094	32.2122	18	0.94837	0.90243	0.996649	0.0363966
M34878	AD	19.404	23.6206	13	0.993491	0.960669	1.02743	0.703234
M34912	AD	19.5391	24.9915	45	0.97493	0.910425	1.044	0.467252
M35114	AD	19.1861	22.9114	11	1.00209	0.943527	1.06429	0.945771
M35126	AD	19.6357	30.0934	16	0.974178	0.939441	1.0102	0.15789
M35127	AD	18.8839	30.0222	20	0.965494	0.903061	1.03224	0.303227
M35137	AD	19.4424	35.9853	59	1.04563	0.989123	1.10537	0.115453
M35159	AD	20.5768	23.7024	8	1.01344	0.966651	1.0625	0.579812
M35160	AD	19.8375	43.9259	12	0.965171	0.898967	1.03625	0.328191
M35186	AD	19.42	185.328	29	0.987006	0.936231	1.04054	0.62742
M35187	AD	19.707	303.716	12	0.974732	0.952583	0.997395	0.0290841
M35189	AD	19.7238	602.909	20	0.98409	0.958336	1.01054	0.235869
M35193	AD	19.501	163.425	25	0.958904	0.915242	1.00465	0.0775851
M35240	AD	19.4082	57.3719	6	1.03683	0.927999	1.15842	0.522684
M35253	AD	20.0781	26.5548	22	0.977935	0.921504	1.03782	0.461879
M35254	AD	19.5014	28.9859	18	0.923138	0.847483	1.00555	0.0667776
M35255	AD	19.5086	28.0537	11	1.01958	0.948019	1.09654	0.60148
M35257	AD	19.1869	36.8831	22	0.980441	0.918862	1.04615	0.550628
M35270	AD	19.0948	33.3735	43	0.974558	0.900167	1.0551	0.524706
M35305	AD	19.1585	22.9161	9	1.0269	0.970601	1.08646	0.356181
M35326	AD	19.2557	40.8037	41	1.01399	0.94282	1.09052	0.708352
M35327	AD	19.6857	24.9928	20	0.998568	0.88954	1.12096	0.980624
M35331	AD	19.476	25.9685	8	1.03408	0.949804	1.12583	0.43977
M35397	AD	19.9807	28.6462	30	1.04008	0.946029	1.14348	0.416419
M35431	AD	19.1647	30.2414	27	0.902547	0.842154	0.967271	0.00371189
M35433	AD	19.7667	68.8192	7	0.933102	0.872161	0.998301	0.0445046
M35439	AD	18.8838	191.821	42	0.970743	0.933024	1.00999	0.141952
M35451	AD	19.4151	32.0438	19	1.00165	0.99541	1.00792	0.605517
M35464	AD	19.0041	50.6797	15	0.884918	0.811063	0.965498	0.00596659
M35472	AD	19.7136	37.4314	19	0.99914	0.96238	1.03731	0.964138
M35551	AD	19.5212	31.7021	12	0.97959	0.947483	1.01278	0.225193
M35626	AD	19.4023	27.8474	7	0.94581	0.880669	1.01577	0.125963
M35628	AD	19.4348	36.5375	10	0.949044	0.876926	1.02709	0.194635
M35631	AD	18.7726	76.2845	24	0.977168	0.927824	1.02914	0.382318
M35635	AD	19.8381	23.4965	10	1.01232	0.991452	1.03362	0.249283
M35669	AD	19.758	264.231	25	0.991706	0.967968	1.01603	0.500471
M35675	AD	18.621	34.0185	47	1.004	0.94584	1.06575	0.895579
M35678	AD	19.747	229.015	26	0.970038	0.943215	0.997623	0.0334782
M35718	AD	19.2196	88.336	26	0.997553	0.939833	1.05882	0.935799
M35754	AD	19.4757	38.559	42	1.02759	0.970353	1.0882	0.35201
M35854	AD	19.402	28.6287	13	0.984295	0.931551	1.04003	0.573219
M35977	AD	19.54	26.7381	11	1.03265	0.965962	1.10394	0.345544
M35978	AD	19.4633	25.2713	18	1.00437	0.962391	1.04819	0.841234
M36009	AD	19.6396	26.9439	12	0.980169	0.938139	1.02408	0.370396
M36103	AD	19.6173	29.2146	13	0.988118	0.957974	1.01921	0.449532
M36115	AD	20.1589	37.7536	11	0.984693	0.959732	1.0103	0.238972
M36131	AD	19.6438	32.8539	16	0.990114	0.955572	1.02591	0.583453
M36134	AD	19.5019	29.8639	13	0.968065	0.939695	0.997291	0.0324608
M36230	AD	19.7761	32.1825	18	0.986974	0.9575	1.01736	0.396643
M36300	AD	19.9699	23.8319	7	0.940457	0.866435	1.0208	0.142186
M36376	AD	20.3556	26.6595	5	1.02367	0.973488	1.07645	0.36161
M36399	AD	19.4193	47.6179	15	1.03901	0.998127	1.08156	0.0617042
M36468	AD	20.2872	23.8257	14	0.983479	0.952389	1.01558	0.309437
M36515	AD	19.2405	27.0326	10	0.996713	0.774064	1.2834	0.979637
M36552	AD	19.8711	26.2582	18	1.00405	0.905293	1.11359	0.938976
M36553	AD	19.1724	198.897	22	0.951063	0.913869	0.98977	0.0136951
M36559	AD	19.5397	24.955	19	0.985226	0.960763	1.01031	0.245922
M36585	AD	19.5063	24.8361	12	1.00733	0.96935	1.04679	0.709672
M36589	AD	19.3347	34.9528	17	0.985543	0.966233	1.00524	0.149162
M36673	AD	19.3064	27.2613	14	1.01192	0.946884	1.08142	0.726627
M36738	AD	20.1446	26.7475	11	1.01812	0.98519	1.05216	0.284346
M36754	AD	19.6954	87.0858	10	0.995976	0.943343	1.05155	0.884276
M36756	AD	19.6289	25.7905	12	0.983714	0.93578	1.0341	0.519425
M36776	AD	19.4584	24.9932	15	1.03066	0.934036	1.13727	0.547683
M36802	AD	19.8338	21.5093	7	0.988417	0.892476	1.09467	0.823043
M36808	AD	19.2568	29.6334	36	1.04127	0.957111	1.13282	0.346977
M36850	AD	19.9946	27.8915	12	0.989143	0.958888	1.02035	0.491001
M37004	AD	19.883	21.1746	8	0.993908	0.934353	1.05726	0.846301
M37058	AD	18.6204	86.0509	43	0.980784	0.918631	1.04714	0.561322
M37097	AD	19.4222	125.087	13	0.986923	0.968395	1.0058	0.173388
M37104	AD	19.3235	26.3822	14	1.03308	1.00066	1.06655	0.0454696
M37112	AD	19.4592	24.9227	13	0.996057	0.982532	1.00977	0.571081
M37190	AD	19.6431	92.9579	18	0.988955	0.963477	1.01511	0.404254
M37202	AD	19.6599	415.857	25	0.99983	0.981267	1.01874	0.985821
M37203	AD	19.4584	77.7391	18	0.97274	0.930723	1.01665	0.2199
M37253	AD	19.4191	24.2023	12	0.978591	0.91687	1.04447	0.514988
M37506	AD	18.7727	35.9872	47	1.01749	0.946057	1.09432	0.640592
M38150	AD	20.6078	21.5048	3	1.00321	0.86418	1.16461	0.966385
M38178	AD	19.1649	285.156	15	1.032	0.9886	1.0773	0.150748
M38768	AD	19.6047	28.8823	15	0.987415	0.909457	1.07206	0.762783
M00553	AD	19.565	26.9269	18	1.00125	0.993847	1.00871	0.741109
M00569	AD	19.7709	56.0603	13	0.996837	0.977388	1.01667	0.752672
M01515	AD	19.7973	28.452	18	0.99902	0.994091	1.00397	0.69747
M15753	AD	19.4666	23.8927	11	1.00416	0.957861	1.05271	0.863019
M15778	AD	19.0779	27.2641	36	0.982083	0.908788	1.06129	0.647785
M17799	AD	18.1068	43.9373	116	0.998653	0.99229	1.00506	0.679427
M18254	AD	19.6859	25.91	13	1.01725	0.988527	1.0468	0.241904
M18281	AD	19.5491	27.6527	10	0.990568	0.980437	1.0008	0.0707927
M18335	AD	19.8255	27.0438	5	0.954822	0.911442	1.00027	0.0513321
M18392	AD	19.5835	23.9117	6	0.975428	0.92213	1.03181	0.38552
M18394	AD	19.822	27.5262	11	0.999731	0.961317	1.03968	0.989245
M20699	AD	19.2196	48.1668	23	1.04188	0.978436	1.10943	0.2006
M21151	AD	19.6102	23.9364	10	1.0003	0.981966	1.01898	0.974598
M27728	AD	19.0125	27.9287	26	0.94972	0.895771	1.00692	0.0838218
M31536	AD	20.2884	27.6258	20	0.999129	0.986882	1.01153	0.889895
M32445	AD	19.5511	30.061	15	0.991827	0.957521	1.02736	0.647721
M33009	AD	19.4118	41.3778	15	0.99419	0.954275	1.03578	0.780476
M33173	AD	19.0219	61.1158	48	1.00011	0.998039	1.00219	0.914659
M33178	AD	17.9752	40.2123	550	0.997814	0.996263	0.999366	0.00579119
M33384	AD	19.6761	25.6182	9	0.993917	0.984267	1.00366	0.220338
M33423	AD	18.9084	49.6595	60	1.00009	0.998898	1.00128	0.88361
M33935	AD	20.244	25.7881	9	0.978577	0.945624	1.01268	0.215324
M34109	AD	19.6042	29.7513	32	1.00017	0.996314	1.00405	0.93035
M34365	AD	17.412	38.8355	57	0.997341	0.993649	1.00105	0.159523
M34384	AD	19.6348	22.8995	6	0.982157	0.949314	1.01614	0.299495
M34389	AD	19.7455	264.864	14	1.02575	0.986728	1.06632	0.198857
M34390	AD	19.2637	30.8531	11	0.972306	0.928897	1.01774	0.228128
M34395	AD	19.5485	117.177	16	1.00798	0.978465	1.03838	0.600295
M34400	AD	19.5001	24.5212	12	0.982436	0.946168	1.02009	0.355838
M34404	AD	20.7235	29.405	10	0.995342	0.978461	1.01251	0.592689
M35320	AD	19.6069	26.5549	9	1.01823	0.957589	1.08272	0.564118
M35322	AD	19.5136	27.4675	17	1.00187	0.985966	1.01803	0.818928
M35527	AD	19.7966	23.6434	12	0.978539	0.928752	1.03099	0.415483
M36095	AD	19.7651	24.8625	5	0.999597	0.971696	1.0283	0.977742
M36097	AD	19.2183	28.524	24	0.998089	0.995636	1.00055	0.127685
M36098	AD	20.0031	30.8711	10	0.983445	0.947762	1.02047	0.375998
M36099	AD	19.5899	28.1585	8	0.99644	0.96236	1.03173	0.840803
M37459	AD	19.7146	27.2758	10	1.01347	0.977621	1.05064	0.466442
M00053	ALS	20.2445	77.8335	8	0.976171	0.298501	3.19232	0.968177
M00054	ALS	18.9429	47.4439	203	0.929754	0.619035	1.39643	0.725619
M00059	ALS	19.7017	55.6594	6	2.27194	0.473806	10.8942	0.304872
M00060	ALS	17.6352	80.978	221	0.965605	0.65036	1.43366	0.862205
M00063	ALS	18.4344	39.0486	48	0.869427	0.537627	1.406	0.568314
M00064	ALS	20.032	46.475	5	6.57502	1.24057	34.8476	0.0268759
M00513	ALS	19.0779	33.3736	27	1.07197	0.517112	2.22219	0.851775
M00527	ALS	19.5016	25.8701	12	1.19477	0.59698	2.39117	0.615177
M00542	ALS	20.0202	23.3384	8	1.05359	0.904456	1.22731	0.502624
M00575	ALS	19.8453	24.9889	5	1.08534	0.837917	1.40581	0.535028
M00577	ALS	20.002	23.7779	3	0.989548	0.420366	2.32941	0.980809
M00584	ALS	19.4584	334.494	27	0.837357	0.59962	1.16935	0.297517
M00599	ALS	19.6316	24.9931	14	1.05728	0.715404	1.56252	0.779886
M00606	ALS	19.8607	65.7722	20	0.695781	0.322532	1.50097	0.355134
M01105	ALS	19.5016	29.7853	17	1.21525	0.658302	2.24338	0.533108
M01107	ALS	19.3065	26.535	19	0.921037	0.713133	1.18955	0.528583
M01110	ALS	19.7477	380.927	32	0.961078	0.691245	1.33624	0.813355
M01114	ALS	19.6772	29.6661	15	1.2186	1.00464	1.47812	0.0447541
M01121	ALS	20.6822	59.031	6	1.00561	0.519567	1.94632	0.98676
M01123	ALS	19.8261	50.0579	13	1.07671	0.985659	1.17617	0.101102
M01125	ALS	18.7727	28.215	17	1.28789	0.512571	3.23594	0.590422
M01284	ALS	19.0029	26.4829	20	1.52564	0.897823	2.59248	0.118399
M01299	ALS	18.7727	57.1759	33	0.821633	0.448035	1.50676	0.525452
M01301	ALS	19.7477	70.7386	25	0.764166	0.355347	1.64332	0.491142
M01302	ALS	18.5926	30.5661	21	0.853678	0.316174	2.30495	0.75491
M01303	ALS	19.6679	37.8589	16	1.14963	0.697169	1.89572	0.584791
M01336	ALS	19.4499	39.5743	29	1.22128	0.703288	2.12077	0.477759
M01356	ALS	19.9457	32.3388	17	1.03214	0.681138	1.564	0.881429
M01358	ALS	19.7477	87.8667	45	0.76351	0.486951	1.19714	0.239652
M01359	ALS	19.3547	28.2947	21	0.932531	0.529251	1.6431	0.809012
M01361	ALS	19.8247	27.0323	18	0.723151	0.432713	1.20853	0.216056
M01365	ALS	19.2196	28.1145	26	1.31014	0.888853	1.93112	0.17234
M01444	ALS	19.1875	31.632	15	0.849981	0.592895	1.21854	0.376457
M01493	ALS	19.3547	27.6397	9	0.623994	0.29591	1.31584	0.215373
M01494	ALS	19.4348	27.8708	23	1.28666	0.627587	2.63785	0.491389
M01508	ALS	18.7725	40.5703	26	0.805975	0.555157	1.17011	0.256781
M01558	ALS	18.772	257.702	39	0.853743	0.546479	1.33377	0.487259
M01561	ALS	19.8497	27.2458	8	0.564902	0.324463	0.983512	0.0435152
M01564	ALS	18.621	53.4842	48	0.676022	0.438873	1.04132	0.075687
M01572	ALS	20.1446	27.1193	15	1.34444	0.706247	2.55935	0.367527
M01573	ALS	19.6621	22.9111	12	1.13431	0.899395	1.43057	0.287149
M01585	ALS	19.257	26.2584	19	0.890264	0.329148	2.40795	0.818898
M01604	ALS	18.7727	418.931	25	0.710501	0.409481	1.23281	0.224143
M01605	ALS	19.6587	24.6468	11	1.12837	0.925858	1.37517	0.231436
M01638	ALS	19.2781	26.9026	22	0.857347	0.532248	1.38102	0.526882
M01640	ALS	19.7182	26.0999	13	1.05903	0.962189	1.16562	0.241112
M01642	ALS	18.9429	31.632	33	0.67434	0.446683	1.01803	0.0607997
M01644	ALS	19.0779	32.7349	36	1.03113	0.64488	1.64873	0.898135
M01645	ALS	19.2571	30.8558	39	1.34414	0.869047	2.07896	0.183791
M01649	ALS	21.0012	45.5501	6	1.5114	0.476955	4.78938	0.482751
M01670	ALS	19.5583	24.6243	13	0.720981	0.366834	1.41703	0.342661
M01712	ALS	19.0361	28.714	13	1.01168	0.665921	1.53695	0.956609
M01769	ALS	18.7725	33.904	40	1.18156	0.745542	1.87259	0.477629
M01898	ALS	19.2571	261.78	39	0.834013	0.581379	1.19643	0.324198
M02132	ALS	18.7727	42.6216	48	0.980113	0.629012	1.52719	0.929267
M02137	ALS	19.7737	760.709	33	1.07803	0.927094	1.25355	0.328903
M02342	ALS	19.3	26.0898	16	0.770307	0.532443	1.11443	0.166064
M02730	ALS	19.4347	77.6795	22	0.623136	0.370517	1.04799	0.0745463
M02734	ALS	19.2569	33.3732	46	1.41291	0.919271	2.17162	0.114995
M03127	ALS	19.3378	65.2676	25	1.25562	0.841404	1.87376	0.265067
M03141	ALS	19.1792	79.9229	31	1.07154	0.730252	1.57234	0.723949
M03147	ALS	19.945	25.9068	4	0.882836	0.363652	2.14325	0.783027
M11438	ALS	20.227	26.5549	4	1.09367	0.20895	5.7244	0.915562
M12017	ALS	19.0934	29.8179	16	1.14859	0.731927	1.80246	0.546789
M12035	ALS	18.7727	30.8558	40	1.50201	0.963291	2.34201	0.0726623
M12067	ALS	18.7725	30.9327	28	0.808563	0.427079	1.5308	0.514077
M12129	ALS	19.0946	34.6689	25	0.698749	0.486868	1.00284	0.0518245
M12261	ALS	19.5544	25.5906	13	1.16001	1.00056	1.34487	0.0491351
M12593	ALS	19.8826	30.566	24	0.6983	0.336659	1.44842	0.334687
M12626	ALS	19.5582	24.6101	8	0.89313	0.374828	2.12812	0.798622
M12768	ALS	19.4197	23.0334	19	0.817067	0.545884	1.22297	0.32619
M12774	ALS	19.2571	61.9988	31	1.26439	0.785187	2.03605	0.334504
M15122	ALS	19.0949	27.9312	18	0.690118	0.428405	1.11171	0.12735
M15140	ALS	18.7727	106.473	44	1.49982	1.01829	2.20904	0.0401965
M15335	ALS	19.9402	23.3208	13	0.878721	0.758561	1.01792	0.0848368
M15365	ALS	19.1998	23.8637	13	1.06038	0.567725	1.98055	0.854069
M15488	ALS	18.9429	33.2228	17	1.60721	0.649	3.98014	0.305099
M15500	ALS	19.2571	293.186	237	0.963148	0.672306	1.37981	0.837796
M15506	ALS	19.1354	29.152	24	1.35526	0.558764	3.28712	0.501292
M15630	ALS	19.3137	1859.25	28	0.868722	0.781017	0.966276	0.00954896
M15650	ALS	19.2196	30.6662	8	1.50361	0.291331	7.76042	0.626188
M15676	ALS	19.2571	67.8016	37	0.824577	0.522249	1.30192	0.407822
M15677	ALS	19.5897	25.0523	10	0.873033	0.719426	1.05944	0.169072
M15749	ALS	19.5821	45.3222	16	0.900383	0.7039	1.15171	0.403474
M15958	ALS	19.5427	22.5021	8	0.999746	0.647748	1.54303	0.999085
M15990	ALS	19.1038	25.8825	17	1.09884	0.866073	1.39417	0.437704
M15996	ALS	19.8517	24.1891	4	0.891837	0.469019	1.69582	0.726996
M16634	ALS	19.7651	21.9235	10	0.802292	0.579696	1.11036	0.183989
M16816	ALS	19.4147	24.2263	14	1.19857	0.752322	1.90953	0.445891
M16818	ALS	19.5014	24.9929	11	0.806248	0.52364	1.24138	0.328057
M16821	ALS	19.0945	28.4337	21	1.22629	0.836371	1.79799	0.296118
M16822	ALS	19.0038	47.6817	20	0.68321	0.41133	1.1348	0.141152
M16823	ALS	19.5192	23.7275	12	1.03393	0.92099	1.16071	0.571847
M17805	ALS	19.5311	23.2601	9	1.08628	0.660361	1.78691	0.744507
M17807	ALS	19.531	45.1143	25	1.00076	0.817598	1.22495	0.99414
M17945	ALS	19.0779	27.2641	38	1.09941	0.692033	1.74661	0.688204
M18283	ALS	19.9986	27.0591	12	1.05234	0.810966	1.36556	0.701148
M18349	ALS	19.4196	50.0281	20	0.835791	0.543498	1.28528	0.413965
M18357	ALS	19.7133	25.2431	8	1.10503	0.845497	1.44423	0.464651
M18369	ALS	19.4128	27.4009	37	1.80271	1.1271	2.88329	0.0139218
M18467	ALS	19.7477	92.5505	12	0.774271	0.531157	1.12866	0.18335
M18474	ALS	19.4008	32.3748	13	0.947567	0.867549	1.03497	0.231518
M18476	ALS	20.051	23.8181	9	1.12649	0.938944	1.35149	0.199876
M18477	ALS	20.463	24.2665	7	1.09032	0.944395	1.25879	0.238187
M18494	ALS	19.4677	25.1297	13	1.14075	0.949523	1.37049	0.159523
M18497	ALS	19.7988	25.8785	17	1.05974	0.949257	1.18308	0.301643
M18929	ALS	19.2196	28.8143	12	1.04584	0.624349	1.75186	0.864795
M19323	ALS	19.9362	29.2792	6	1.07656	0.612495	1.89223	0.797667
M19324	ALS	19.8201	27.3847	6	1.05272	0.708752	1.56363	0.799084
M19362	ALS	19.8712	28.1095	23	0.887398	0.488758	1.61118	0.694635
M19364	ALS	18.9792	30.2385	19	0.745813	0.515205	1.07964	0.120199
M19368	ALS	19.5578	23.2595	12	0.577359	0.326563	1.02076	0.0588536
M19396	ALS	19.5102	24.9922	7	1.23428	0.7055	2.15938	0.460777
M19414	ALS	19.7449	25.2174	12	1.02233	0.617947	1.69134	0.931481
M19415	ALS	20.3627	22.9241	5	0.838955	0.513497	1.37069	0.483256
M19934	ALS	18.7727	50.8456	39	0.971717	0.661234	1.42799	0.883862
M20489	ALS	18.9429	33.9042	39	1.09095	0.649676	1.83195	0.742037
M20675	ALS	19.0949	190.797	38	0.667423	0.498721	0.893193	0.00653322
M21044	ALS	19.2654	29.1521	18	0.895049	0.609848	1.31363	0.571112
M21047	ALS	19.2782	33.7412	17	2.47216	1.27233	4.80346	0.00757082
M21049	ALS	19.5927	30.9313	15	0.897037	0.760819	1.05764	0.196
M21127	ALS	20.0779	26.116	14	0.814251	0.490678	1.3512	0.426504
M21184	ALS	20.0145	36.8131	15	1.17945	0.90332	1.53999	0.225203
M21188	ALS	19.4193	30.0375	26	0.715793	0.48569	1.05491	0.0910638
M21630	ALS	18.8839	401.067	25	1.0872	0.783872	1.50791	0.616413
M22030	ALS	19.5573	76.218	19	0.98811	0.622498	1.56846	0.959534
M22032	ALS	19.0864	23.3529	16	1.14767	0.775848	1.69767	0.49053
M22116	ALS	19.8999	41.0652	14	0.757427	0.420848	1.36319	0.354124
M22130	ALS	19.6054	88.9396	20	1.03269	0.688111	1.54982	0.876585
M22138	ALS	19.6023	69.4093	8	1.20176	0.780564	1.85024	0.403855
M22175	ALS	19.7754	82.7668	8	0.929339	0.671067	1.28701	0.659126
M22177	ALS	18.4843	42.2371	59	1.215	0.875943	1.68529	0.243398
M22189	ALS	19.1997	40.1001	10	0.900577	0.571773	1.41846	0.651418
M22481	ALS	19.0779	146.639	40	1.1228	0.82385	1.53024	0.463389
M22548	ALS	19.3546	29.2319	13	1.02735	0.580826	1.81715	0.926113
M22649	ALS	19.5576	25.7383	13	0.4831	0.233688	0.998707	0.0495933
M22842	ALS	19.7977	22.2298	9	1.0707	0.921103	1.24459	0.373651
M24074	ALS	19.4357	27.1587	21	0.90107	0.58661	1.3841	0.634299
M25459	ALS	19.0779	81.9807	31	1.05627	0.797221	1.39949	0.70296
M25599	ALS	19.2912	35.9887	23	1.09379	0.78157	1.53073	0.601123
M27256	ALS	18.7726	25.5516	36	1.45767	0.835454	2.54329	0.184534
M27273	ALS	19.9699	25.5677	13	1.18322	0.619575	2.25963	0.610274
M27278	ALS	19.5142	159.437	24	0.844019	0.5621	1.26733	0.413557
M27447	ALS	19.573	44.5292	15	0.912416	0.736087	1.13098	0.402842
M27513	ALS	19.2918	40.0999	23	1.06156	0.756855	1.48893	0.72929
M27531	ALS	20.0532	28.6774	18	0.978102	0.837695	1.14204	0.77944
M27672	ALS	20.2886	24.9716	5	0.966805	0.627939	1.48854	0.878145
M27710	ALS	19.4343	254.803	22	1.07158	0.900612	1.275	0.435653
M27716	ALS	19.5337	686.389	20	1.0776	0.963016	1.20582	0.192583
M27718	ALS	19.7721	105.034	12	1.17799	0.856201	1.62071	0.314288
M27722	ALS	19.54	23.185	7	0.901659	0.542074	1.49978	0.690084
M27738	ALS	19.477	24.9932	18	0.974345	0.699672	1.35685	0.877751
M30805	ALS	19.2192	28.3093	15	0.984707	0.713219	1.35954	0.925393
M31453	ALS	19.5629	24.9931	16	0.949415	0.621182	1.45109	0.810464
M31522	ALS	19.7523	22.5479	4	0.986067	0.732656	1.32713	0.926241
M31548	ALS	19.8783	21.989	13	1.05727	0.830503	1.34597	0.651157
M31555	ALS	19.5752	23.7591	13	1.35352	0.975856	1.87736	0.0697484
M31591	ALS	19.4242	508.646	30	1.00974	0.918426	1.11012	0.841214
M31787	ALS	19.8982	40.1551	15	1.04858	0.909154	1.20938	0.514653
M32197	ALS	19.6988	51.7152	23	1.1241	0.732756	1.72446	0.59209
M32198	ALS	19.0949	99.26	20	1.05821	0.69713	1.60632	0.790465
M32315	ALS	18.7727	122.264	39	0.685087	0.448752	1.04589	0.0797546
M32319	ALS	18.9291	21.7531	5	1.27629	0.80182	2.03151	0.303645
M32322	ALS	20.1162	28.8444	3	0.779661	0.29466	2.06296	0.616127
M32328	ALS	19.7052	453.695	24	1.07138	0.848527	1.35277	0.562256
M32338	ALS	19.0044	686.615	35	1.08707	0.855387	1.3815	0.494812
M32339	ALS	19.2571	59.3645	44	0.881756	0.562629	1.38189	0.583036
M32346	ALS	19.5249	34.9217	13	0.935595	0.791771	1.10555	0.434374
M32348	ALS	18.7727	67.5072	49	0.978	0.643961	1.48531	0.916899
M32379	ALS	19.6058	87.8619	14	0.86669	0.66005	1.13802	0.303212
M32388	ALS	19.7354	31.6283	7	0.980702	0.671657	1.43195	0.91963
M32393	ALS	19.686	33.5342	15	1.06424	0.582195	1.94541	0.839684
M32405	ALS	19.3085	86.7603	17	0.942337	0.722216	1.22955	0.661707
M32412	ALS	19.5441	1912.98	53	1.04454	0.955503	1.14187	0.337747
M32418	ALS	19.1354	63.9826	15	0.96777	0.698574	1.3407	0.843836
M32425	ALS	19.3547	56.2347	23	0.934868	0.743562	1.17539	0.564239
M32452	ALS	19.5404	147.537	38	1.21188	0.843768	1.74058	0.298189
M32489	ALS	19.2571	28.0431	38	1.09904	0.671297	1.79932	0.70733
M32492	ALS	18.7727	32.7349	49	0.897206	0.641436	1.25496	0.526389
M32497	ALS	19.2498	273.749	31	1.03202	0.842502	1.26416	0.760793
M32504	ALS	19.3289	56.8793	12	1.12862	0.780388	1.63225	0.520382
M32518	ALS	19.4144	35.9902	41	1.08689	0.640374	1.84477	0.757546
M32549	ALS	19.5283	56.1318	13	1.11702	0.922177	1.35302	0.257829
M32553	ALS	19.6937	26.8788	14	1.00704	0.766875	1.32242	0.959742
M32557	ALS	19.7596	23.6922	13	0.95082	0.723936	1.24881	0.716933
M32560	ALS	19.5981	25.9781	13	1.01386	0.877726	1.17112	0.851527
M32564	ALS	20.4018	50.9387	17	1.00086	0.851278	1.17673	0.991682
M32578	ALS	19.5507	104.209	21	0.940833	0.762878	1.1603	0.568589
M32586	ALS	19.7817	426.106	19	1.02008	0.882419	1.17921	0.788098
M32587	ALS	19.8376	66.1625	13	0.936391	0.624018	1.40513	0.750947
M32593	ALS	19.5359	24.788	14	0.901662	0.660144	1.23154	0.515217
M32616	ALS	19.5084	23.5377	12	1.12499	0.939635	1.34692	0.199792
M32632	ALS	19.2571	50.7474	28	0.94553	0.7065	1.26543	0.706402
M32634	ALS	19.2571	44.4286	43	0.720866	0.470596	1.10423	0.132512
M32635	ALS	19.6069	157.998	15	1.12929	0.781762	1.6313	0.517028
M32644	ALS	19.5403	33.3735	40	0.947091	0.608895	1.47313	0.809413
M32651	ALS	19.492	31.1616	27	0.876121	0.603968	1.27091	0.485911
M32654	ALS	19.0044	108.964	29	0.755289	0.520147	1.09673	0.140274
M32672	ALS	19.2919	107.9	20	1.17345	0.923016	1.49183	0.191582
M32675	ALS	19.4584	30.8784	22	0.59663	0.271575	1.31075	0.198407
M32691	ALS	19.4822	29.7435	17	1.01495	0.824684	1.24912	0.888568
M32698	ALS	19.3547	82.368	17	1.58935	0.915535	2.75907	0.0996842
M32709	ALS	19.42	117.117	38	0.870106	0.673595	1.12395	0.286727
M32729	ALS	19.0772	35.3603	46	1.17957	0.786557	1.76895	0.424434
M32735	ALS	19.5888	54.5914	15	0.89233	0.727713	1.09419	0.273573
M32739	ALS	20.019	24.6602	9	1.08336	0.596575	1.96733	0.792535
M32740	ALS	18.7726	72.2303	51	0.776456	0.500626	1.20426	0.25851
M32753	ALS	19.5535	64.2495	14	1.0714	0.858526	1.33705	0.541713
M32754	ALS	19.5008	28.8353	15	0.956685	0.845654	1.08229	0.481734
M32755	ALS	19.7242	27.7088	24	0.993607	0.771318	1.27996	0.960414
M32757	ALS	19.531	653.261	25	1.02304	0.887927	1.1787	0.752648
M32758	ALS	19.5305	516.459	21	0.982209	0.8294	1.16317	0.835183
M32759	ALS	19.6064	537.685	25	0.976462	0.830676	1.14783	0.772797
M32761	ALS	19.6447	92.4738	22	1.3247	1.00317	1.7493	0.0474495
M32762	ALS	19.5826	45.19	15	1.03401	0.87753	1.21839	0.689547
M32769	ALS	19.6629	29.8865	7	0.87421	0.641641	1.19107	0.394265
M32786	ALS	19.6216	57.7889	18	0.928019	0.770033	1.11842	0.432706
M32787	ALS	19.6297	77.4174	19	0.99931	0.78247	1.27624	0.995586
M32795	ALS	19.9573	114.481	15	0.910398	0.717984	1.15438	0.438399
M32800	ALS	19.6744	34.2312	12	0.985086	0.851815	1.13921	0.839437
M32802	ALS	19.6367	29.5799	8	1.02618	0.744888	1.41371	0.874359
M32808	ALS	20.2435	137.94	19	0.971694	0.817831	1.1545	0.744062
M32814	ALS	19.4847	26.9816	14	0.63653	0.354152	1.14406	0.131027
M32836	ALS	21.6682	49.5654	7	0.968842	0.709665	1.32267	0.842037
M32838	ALS	19.7732	30.8226	10	0.964298	0.66043	1.40798	0.850683
M32846	ALS	19.5573	1431.87	28	1.02224	0.94375	1.10725	0.589467
M32847	ALS	19.3286	643.129	20	0.976568	0.821648	1.1607	0.787894
M32854	ALS	19.4564	25.7169	7	0.969877	0.789352	1.19169	0.771002
M32855	ALS	19.4763	400.619	25	1.1642	0.978849	1.38465	0.0857337
M32857	ALS	19.7908	23.9777	8	0.708812	0.518128	0.969672	0.0313512
M32863	ALS	19.6839	27.9416	15	1.0307	0.91836	1.15678	0.607572
M32867	ALS	18.5511	47.0076	22	0.903287	0.360778	2.26158	0.828039
M32869	ALS	19.8245	24.3151	14	1.38106	1.00509	1.89767	0.046449
M32910	ALS	18.7727	817.065	58	1.33119	0.995944	1.77928	0.0532967
M32980	ALS	19.7962	104.132	12	1.62063	1.09502	2.39853	0.0157892
M33084	ALS	19.5385	54.1935	9	0.993386	0.783427	1.25961	0.956316
M33131	ALS	19.346	55.1091	12	1.01137	0.747761	1.3679	0.941517
M33132	ALS	18.7727	550.719	38	0.655928	0.438269	0.981685	0.0403826
M33137	ALS	19.8515	93.7284	15	1.10925	0.97748	1.25877	0.108068
M33138	ALS	19.6994	516.586	27	1.0094	0.830062	1.2275	0.925276
M33140	ALS	19.3547	26.9819	12	0.905247	0.542968	1.50925	0.702684
M33144	ALS	19.5527	172.397	9	0.978508	0.82502	1.16055	0.802912
M33150	ALS	19.5981	25.7677	8	0.946904	0.83041	1.07974	0.415336
M33163	ALS	19.7179	28.8432	19	0.912121	0.600026	1.38655	0.666849
M33165	ALS	19.4023	68.7436	16	0.95843	0.747811	1.22837	0.737359
M33188	ALS	20.0171	28.5791	4	0.889363	0.749974	1.05466	0.177626
M33190	ALS	19.6437	25.1716	20	0.999685	0.898869	1.11181	0.995362
M33192	ALS	19.5068	24.8883	13	0.990112	0.858413	1.14202	0.891466
M33194	ALS	19.6387	23.8391	14	1.04964	0.935118	1.17819	0.411126
M33195	ALS	20.1317	23.9459	8	1.03621	0.891723	1.20411	0.642452
M33197	ALS	20.4653	24.8658	10	1.0326	0.909552	1.17229	0.620243
M33203	ALS	19.5661	33.495	16	0.957817	0.868737	1.05603	0.386847
M33204	ALS	19.4745	22.7184	13	1.0723	0.674805	1.70396	0.767666
M33221	ALS	19.5692	25.2071	18	1.03373	0.791503	1.35008	0.80762
M33228	ALS	18.8722	431.594	23	0.932975	0.68198	1.27635	0.664358
M33230	ALS	18.9795	40.5925	15	1.22607	0.751843	1.99942	0.414022
M33250	ALS	19.703	210.409	23	1.0482	0.903125	1.21658	0.535681
M33353	ALS	19.5044	27.4635	21	1.03312	0.936831	1.1393	0.513951
M33359	ALS	19.5662	30.9297	8	1.04482	0.917262	1.19012	0.509262
M33363	ALS	19.9118	28.8544	10	1.13483	0.772296	1.66756	0.519491
M33364	ALS	19.777	23.7301	10	0.643366	0.394598	1.04897	0.0770109
M33380	ALS	19.0948	28.6459	40	0.935183	0.622197	1.40561	0.747208
M33389	ALS	18.6209	45.3726	57	0.899051	0.595116	1.35821	0.613192
M33390	ALS	19.5513	28.1381	15	1.04942	0.880764	1.25036	0.589482
M33391	ALS	19.9277	31.0895	15	1.05205	0.991763	1.11599	0.0919444
M33408	ALS	19.6022	26.9057	14	0.880986	0.741634	1.04652	0.1492
M33415	ALS	19.5579	499.082	24	0.971469	0.858304	1.09955	0.646892
M33420	ALS	19.5174	26.8002	13	0.847688	0.67121	1.07057	0.165309
M33422	ALS	18.7726	34.0185	35	1.70003	0.951739	3.03666	0.0729979
M33441	ALS	20.7593	217.503	18	0.827369	0.659353	1.0382	0.101783
M33442	ALS	19.2571	27.2642	26	0.475465	0.222711	1.01507	0.0546926
M33443	ALS	19.6913	22.3592	9	0.971531	0.541726	1.74234	0.922795
M33447	ALS	19.3547	58.4428	13	0.683414	0.464973	1.00448	0.0527175
M33453	ALS	19.4569	30.1237	19	0.995819	0.724699	1.36837	0.979388
M33477	ALS	18.9795	54.5807	46	1.23175	0.781392	1.94169	0.369375
M33488	ALS	19.4839	29.0758	18	1.23474	0.995248	1.53187	0.0552803
M33507	ALS	19.4174	2912.88	39	1.10576	1.02381	1.19428	0.0105041
M33508	ALS	19.7881	226.604	20	1.19205	1.04667	1.35763	0.00811475
M33509	ALS	19.3545	33.9626	7	1.04518	0.636207	1.71706	0.861494
M33510	ALS	19.6718	48.4497	26	0.914416	0.663601	1.26003	0.584404
M33515	ALS	18.9793	44.4319	45	0.630253	0.403398	0.984683	0.0425842
M33531	ALS	19.5759	22.777	8	0.936829	0.702927	1.24856	0.656143
M33587	ALS	19.545	26.2913	14	0.859471	0.589668	1.25272	0.430807
M33609	ALS	19.4797	31.8941	21	1.05443	0.986558	1.12698	0.11845
M33610	ALS	19.3091	32.509	29	1.01691	0.969845	1.06626	0.487928
M33627	ALS	19.9076	23.0701	10	1.314	0.813016	2.12371	0.264912
M33633	ALS	19.8479	25.718	10	1.04304	0.836959	1.29986	0.707516
M33637	ALS	19.6527	29.0778	10	1.15993	0.925497	1.45374	0.197797
M33638	ALS	19.5799	23.4775	11	0.884171	0.646293	1.2096	0.441367
M33652	ALS	19.5842	27.977	7	0.976973	0.73691	1.29524	0.87137
M33653	ALS	19.4875	26.5822	14	0.910002	0.705405	1.17394	0.467969
M33658	ALS	19.7551	24.8557	8	1.08422	0.864217	1.36023	0.484674
M33666	ALS	19.1345	99.1368	30	0.964455	0.670419	1.38745	0.845345
M33675	ALS	19.5238	25.4853	8	0.933766	0.688387	1.26661	0.659535
M33683	ALS	19.5377	27.2081	12	0.905965	0.813931	1.00841	0.0707916
M33751	ALS	19.2244	28.3299	24	1.00538	0.964881	1.04758	0.798107
M33782	ALS	19.9165	25.9066	14	1.166	1.03857	1.30906	0.0092991
M33801	ALS	19.6468	84.5442	10	1.36318	1.04805	1.77306	0.0208944
M33821	ALS	19.3547	78.9909	21	0.740529	0.540597	1.0144	0.0613599
M33822	ALS	19.9553	23.7062	8	0.984554	0.58297	1.66277	0.953574
M33833	ALS	19.5892	24.856	8	1.02388	0.717987	1.4601	0.896305
M33835	ALS	19.8904	27.607	9	1.09007	0.920692	1.2906	0.316864
M33864	ALS	19.6325	22.8623	10	1.04319	0.847556	1.28398	0.689853
M33871	ALS	19.5685	33.6297	13	1.34605	0.955239	1.89675	0.0894573
M33877	ALS	19.3462	32.6479	28	1.02831	0.986149	1.07227	0.19122
M33883	ALS	19.4258	100.458	15	1.04312	0.92324	1.17857	0.497905
M33884	ALS	19.502	110.989	13	0.906668	0.685197	1.19972	0.492923
M33885	ALS	19.6254	25.3997	13	1.00721	0.870159	1.16586	0.923257
M33892	ALS	19.4336	30.0506	31	1.12474	0.833725	1.51732	0.441593
M33901	ALS	19.6254	192.55	23	0.955437	0.788657	1.15749	0.641394
M33910	ALS	19.7169	25.1836	15	1.00476	0.779288	1.29547	0.970786
M33936	ALS	19.6936	347.728	24	1.0233	0.823778	1.27116	0.835094
M33937	ALS	20.2444	49.376	12	1.40438	0.936363	2.10633	0.100582
M33939	ALS	19.3078	24.4077	12	1.0113	0.560581	1.82441	0.97022
M33941	ALS	19.4491	188.508	19	0.950759	0.744188	1.21467	0.686209
M33955	ALS	19.42	28.4367	31	0.638493	0.352964	1.155	0.137946
M33957	ALS	19.49	24.801	10	0.872813	0.560269	1.35971	0.547546
M33960	ALS	19.6955	25.8701	18	1.01437	0.619753	1.66026	0.954732
M33961	ALS	19.6996	26.1488	11	1.12046	0.655033	1.91659	0.677938
M33968	ALS	19.7247	39.4994	20	1.07007	0.823434	1.39058	0.612404
M33969	ALS	19.5535	63.9825	11	0.967834	0.674921	1.38787	0.858903
M33971	ALS	19.7687	22.0555	5	0.399519	0.194236	0.82176	0.0126503
M33972	ALS	19.8479	24.9932	7	0.824572	0.473956	1.43456	0.494782
M33973	ALS	19.6069	339.941	17	0.991032	0.861033	1.14066	0.900078
M34035	ALS	19.7594	22.5012	4	0.587499	0.317669	1.08652	0.0899915
M34040	ALS	19.1648	726.344	21	0.835149	0.690876	1.00955	0.0626416
M34062	ALS	19.5404	37.9094	30	0.622285	0.31267	1.23849	0.176742
M34106	ALS	19.6291	252.147	19	1.11777	0.924183	1.35191	0.251209
M34112	ALS	20.0067	24.2945	15	0.93974	0.733311	1.20428	0.623336
M34123	ALS	19.2917	87.3258	23	1.39169	0.942426	2.05512	0.0965489
M34214	ALS	19.7187	134.933	23	1.53756	1.1059	2.13772	0.0105088
M34221	ALS	19.7245	58.761	12	1.58728	1.1136	2.26244	0.0106188
M34244	ALS	19.42	37.0258	25	0.970408	0.687793	1.36915	0.864199
M34245	ALS	19.5124	26.0881	20	0.994811	0.779401	1.26976	0.96667
M34283	ALS	19.1354	182.184	45	0.841253	0.580736	1.21864	0.360602
M34289	ALS	19.3804	26.1219	14	1.07389	0.786186	1.46688	0.654118
M34306	ALS	19.0947	134.879	27	0.778394	0.64855	0.934234	0.00713291
M34314	ALS	19.5769	35.0013	12	0.93843	0.780252	1.12868	0.499851
M34322	ALS	19.0642	48.0969	38	1.02733	0.980708	1.07617	0.255188
M34327	ALS	19.768	24.969	9	1.03143	0.877899	1.21182	0.706649
M34329	ALS	19.3702	22.4293	12	1.00757	0.857575	1.18381	0.926899
M34336	ALS	19.6467	28.4332	24	0.87125	0.735562	1.03197	0.110566
M34338	ALS	19.4265	35.9015	44	0.989054	0.972951	1.00542	0.188826
M34339	ALS	19.4634	27.6434	22	1.06711	0.970023	1.17391	0.182012
M34344	ALS	19.3527	28.2084	12	0.965224	0.86133	1.08165	0.542415
M34350	ALS	19.3992	32.4714	15	1.09234	0.962046	1.24027	0.17292
M34359	ALS	18.7722	50.5981	42	1.00243	0.646151	1.55516	0.991354
M34407	ALS	20.0608	179.71	27	1.0279	0.790933	1.33585	0.836961
M34409	ALS	19.4579	42.0408	5	1.52082	0.734773	3.14775	0.25865
M34416	ALS	19.5013	46.4166	14	0.746119	0.538246	1.03427	0.0787964
M34419	ALS	19.4958	26.5549	14	0.862931	0.491402	1.51536	0.60785
M34420	ALS	19.6923	211.802	26	0.944914	0.868975	1.02749	0.184985
M34441	ALS	19.4313	26.4584	17	0.924298	0.732631	1.16611	0.506745
M34453	ALS	18.5511	25.1165	3	1.23124	0.14667	10.3358	0.848032
M34456	ALS	19.2898	25.8672	27	1.12534	0.805759	1.57168	0.488414
M34469	ALS	20.0298	28.7202	12	1.01997	0.749258	1.3885	0.899994
M34481	ALS	19.8189	1169.83	26	0.860281	0.727252	1.01764	0.0791066
M34499	ALS	19.4896	24.3801	6	1.09225	0.836661	1.42593	0.516478
M34513	ALS	19.4763	23.3467	13	1.09175	0.883823	1.3486	0.41545
M34516	ALS	19.557	29.2266	18	1.00558	0.95647	1.05722	0.827449
M34527	ALS	19.3244	73.7376	17	0.741529	0.501994	1.09536	0.133004
M34530	ALS	19.458	23.5884	9	0.936524	0.775365	1.13118	0.496095
M34533	ALS	19.3929	67.126	18	0.999777	0.815646	1.22548	0.998288
M34534	ALS	19.3521	37.7194	14	1.22436	0.887984	1.68817	0.216798
M34535	ALS	19.8505	28.0572	8	1.0056	0.951727	1.06252	0.842458
M34539	ALS	19.4171	36.5451	20	1.09417	0.822566	1.45544	0.536451
M34674	ALS	19.4166	44.0358	13	1.08133	0.806678	1.44951	0.600954
M34732	ALS	19.6584	22.0313	5	0.854277	0.367215	1.98736	0.714651
M34761	ALS	20.094	32.2122	19	0.682026	0.500961	0.928535	0.0150582
M34878	ALS	19.404	23.6206	11	1.15941	0.903155	1.48837	0.245784
M34912	ALS	19.5391	32.0978	46	1.20794	0.831555	1.75468	0.321354
M35114	ALS	19.1861	22.9114	11	1.35737	0.885122	2.08157	0.161336
M35126	ALS	19.6357	30.0934	17	1.04621	0.807063	1.35622	0.732991
M35127	ALS	18.8839	30.0222	20	0.907364	0.589578	1.39644	0.658539
M35137	ALS	19.4424	35.9853	61	1.16512	0.808098	1.67987	0.413004
M35159	ALS	20.5768	49.351	9	0.942369	0.71685	1.23884	0.670598
M35160	ALS	19.8375	43.9259	9	1.12449	0.669717	1.88807	0.657231
M35186	ALS	19.6069	185.328	26	1.00868	0.707256	1.43856	0.961959
M35187	ALS	19.707	303.716	12	1.03545	0.891964	1.20201	0.647176
M35189	ALS	19.7238	602.909	23	1.01719	0.861782	1.20063	0.840282
M35193	ALS	18.9789	163.425	26	1.18913	0.879494	1.60778	0.260345
M35240	ALS	19.4082	57.3719	8	0.667991	0.334988	1.33202	0.251878
M35253	ALS	20.0781	26.5548	21	0.93862	0.636397	1.38437	0.74935
M35254	ALS	19.5014	28.9859	17	1.17217	0.687697	1.99794	0.559314
M35255	ALS	19.5086	31.7402	13	0.967238	0.653569	1.43145	0.867724
M35257	ALS	19.1869	36.8831	21	0.720515	0.47232	1.09913	0.128187
M35270	ALS	19.0948	33.3735	42	0.722345	0.430002	1.21344	0.219084
M35305	ALS	19.1585	23.7669	11	0.774226	0.55564	1.0788	0.130579
M35326	ALS	19.2557	40.8037	43	0.874729	0.558827	1.36921	0.558245
M35327	ALS	19.6857	24.9928	20	0.71316	0.330015	1.54114	0.389878
M35331	ALS	19.476	25.9685	8	1.46602	0.878622	2.44613	0.14304
M35397	ALS	19.9807	28.6462	31	0.681847	0.370009	1.25649	0.219495
M35431	ALS	19.1647	30.2414	26	1.36526	0.870028	2.14238	0.175633
M35433	ALS	19.7667	68.8192	8	1.14008	0.739352	1.75801	0.552975
M35439	ALS	18.8838	191.821	44	1.17199	0.907905	1.51288	0.223115
M35451	ALS	19.4151	32.0137	17	1.08238	0.999064	1.17264	0.0527403
M35464	ALS	19.0041	50.6797	17	0.888332	0.514682	1.53325	0.670682
M35472	ALS	19.7136	37.4314	19	0.996102	0.784475	1.26482	0.974431
M35551	ALS	19.5212	31.7021	12	0.875365	0.706122	1.08517	0.224627
M35626	ALS	19.4023	27.8474	7	1.29662	0.927052	1.81352	0.129147
M35628	ALS	19.4348	36.5375	10	0.94651	0.562329	1.59316	0.836065
M35631	ALS	18.7726	76.2845	26	0.955614	0.679746	1.34344	0.793914
M35635	ALS	19.8381	23.4965	10	1.04077	0.910984	1.18906	0.556478
M35669	ALS	19.758	264.231	25	1.10514	0.945099	1.29227	0.210386
M35675	ALS	18.621	34.0185	49	0.900712	0.61492	1.31933	0.591296
M35678	ALS	19.747	229.015	27	1.12281	0.929142	1.35684	0.230478
M35718	ALS	19.2196	88.336	24	0.953583	0.638306	1.42458	0.816484
M35754	ALS	19.1726	38.559	45	1.09928	0.758527	1.5931	0.617071
M35854	ALS	19.402	28.6287	12	0.936011	0.649829	1.34823	0.722461
M35977	ALS	19.7474	26.7381	10	1.00529	0.650476	1.55365	0.98104
M35978	ALS	19.4633	25.2713	18	0.935443	0.717931	1.21885	0.621137
M36009	ALS	19.6396	41.8513	13	0.81862	0.620156	1.0806	0.15772
M36103	ALS	19.6173	29.2146	15	0.857946	0.696591	1.05668	0.149486
M36115	ALS	20.1589	93.6977	13	0.99105	0.847273	1.15922	0.910491
M36131	ALS	19.6438	58.7117	18	1.20313	0.974437	1.48549	0.0855738
M36134	ALS	19.5019	91.3662	14	0.985209	0.825628	1.17563	0.868724
M36230	ALS	19.8053	70.4479	19	0.916083	0.760915	1.10289	0.354626
M36300	ALS	19.9699	23.8319	9	1.36612	0.840694	2.21995	0.207871
M36376	ALS	20.3556	26.6595	5	1.02992	0.741353	1.4308	0.860496
M36399	ALS	19.4193	47.6179	13	0.946565	0.717581	1.24862	0.697548
M36468	ALS	20.2872	23.8257	15	1.05371	0.877288	1.26562	0.575733
M36515	ALS	19.2405	27.0326	10	1.39119	0.218351	8.86371	0.726758
M36552	ALS	19.4582	23.0335	18	1.9142	0.958152	3.82421	0.0659305
M36553	ALS	19.1724	198.897	24	1.12416	0.870271	1.45212	0.370206
M36559	ALS	19.5397	24.955	19	1.02501	0.861112	1.2201	0.781105
M36585	ALS	19.5063	24.8361	12	1.23601	0.955727	1.59848	0.106344
M36589	ALS	19.3347	34.9528	20	0.990152	0.870132	1.12673	0.880665
M36673	ALS	19.3064	27.2613	14	0.872694	0.572447	1.33042	0.526774
M36738	ALS	20.1446	26.7475	11	0.944782	0.754853	1.1825	0.619861
M36754	ALS	19.6954	87.0858	11	1.06001	0.740488	1.5174	0.750173
M36756	ALS	19.6289	25.7905	12	1.476	1.06109	2.05315	0.0207728
M36776	ALS	19.4584	24.9932	16	1.09331	0.591161	2.02201	0.776127
M36802	ALS	19.8338	23.3503	9	0.907769	0.501995	1.64154	0.748856
M36808	ALS	19.2568	29.6334	36	1.49138	0.858716	2.59016	0.155853
M36850	ALS	19.9946	27.8915	11	1.02302	0.824589	1.2692	0.836106
M37004	ALS	19.883	21.1746	9	1.10219	0.738541	1.6449	0.633852
M37058	ALS	18.6204	413.318	49	0.762024	0.537922	1.07949	0.126139
M37097	ALS	19.4222	125.087	15	1.01237	0.896374	1.14337	0.843074
M37104	ALS	19.3235	26.3822	15	0.951715	0.7678	1.17969	0.651485
M37112	ALS	19.4592	24.9227	11	0.93543	0.848529	1.03123	0.179664
M37190	ALS	20.1502	128.003	20	1.14748	1.00146	1.3148	0.0476018
M37202	ALS	19.6599	415.857	27	1.03976	0.92523	1.16846	0.512593
M37203	ALS	19.4584	77.7391	20	1.18637	0.903351	1.55805	0.219073
M37253	ALS	19.4191	22.4871	11	1.25337	0.800323	1.96289	0.323764
M37506	ALS	18.7727	35.9872	48	1.02202	0.639736	1.63275	0.927382
M38150	ALS	20.6078	25.7115	4	0.968646	0.523678	1.7917	0.919137
M38178	ALS	19.1649	285.156	15	1.16169	0.879485	1.53444	0.291181
M38768	ALS	19.6047	28.8823	15	1.31873	0.782904	2.22127	0.29835
M00553	ALS	19.565	26.9269	16	1.00107	0.945235	1.06021	0.970792
M00569	ALS	19.7709	56.0603	13	1.12081	0.985454	1.27476	0.0824188
M01515	ALS	19.7973	28.452	18	0.98394	0.948066	1.02117	0.392888
M15753	ALS	19.4666	23.8927	13	1.47574	1.11508	1.95303	0.00649191
M15778	ALS	19.0779	27.2641	38	1.13352	0.68148	1.88542	0.629258
M17799	ALS	18.1068	43.9373	116	0.987327	0.945305	1.03122	0.565475
M18254	ALS	19.6859	25.91	13	0.979488	0.818457	1.1722	0.821076
M18281	ALS	19.5491	27.6527	12	0.982571	0.923364	1.04557	0.579228
M18335	ALS	19.6388	27.0438	6	1.03792	0.806835	1.3352	0.772069
M18392	ALS	19.5835	23.9117	6	1.04775	0.726188	1.5117	0.803064
M18394	ALS	19.822	27.5262	12	1.20075	0.934362	1.54308	0.152866
M20699	ALS	19.2196	48.1668	25	1.35068	1.01289	1.80111	0.0406391
M21151	ALS	19.6102	23.9364	9	1.15389	1.01667	1.30964	0.0266957
M27728	ALS	19.0125	27.9287	27	1.13201	0.814347	1.5736	0.460591
M31536	ALS	19.686	27.6258	21	1.02351	0.945851	1.10755	0.56378
M32445	ALS	19.5511	30.061	15	1.21729	0.968507	1.52998	0.0918652
M33009	ALS	19.4118	41.3778	18	1.15047	0.884237	1.49687	0.296576
M33173	ALS	19.0219	61.1158	46	0.989854	0.975909	1.004	0.158889
M33178	ALS	17.9923	29.6965	469	0.973194	0.962303	0.984209	2.22407e-06
M33384	ALS	19.6761	25.6182	12	1.07207	1.00125	1.14789	0.0459581
M33423	ALS	18.9084	49.6595	55	0.992746	0.984137	1.00143	0.101381
M33935	ALS	19.9162	25.7881	10	0.940042	0.75847	1.16508	0.572316
M34109	ALS	19.6042	29.7513	33	0.996766	0.976165	1.0178	0.761094
M34365	ALS	17.412	38.8355	60	1.01792	0.993549	1.04288	0.150866
M34384	ALS	19.6348	30.3977	7	0.993194	0.804824	1.22565	0.949252
M34389	ALS	19.7455	264.864	15	0.895999	0.702254	1.1432	0.377024
M34390	ALS	19.2637	30.8531	10	0.730147	0.563506	0.946066	0.0173403
M34395	ALS	19.5485	117.177	15	1.10587	0.894835	1.36667	0.351613
M34400	ALS	19.5001	24.5212	12	0.900279	0.695252	1.16577	0.425619
M34404	ALS	20.7235	29.405	10	1.01812	0.908162	1.1414	0.758091
M35320	ALS	19.6069	26.5549	9	0.94177	0.642144	1.3812	0.758803
M35322	ALS	19.5136	27.4675	15	1.02351	0.911474	1.14931	0.69445
M35527	ALS	19.8509	23.6434	11	0.996573	0.681853	1.45656	0.985854
M36095	ALS	19.7651	24.8625	4	0.9718	0.792758	1.19128	0.783068
M36097	ALS	19.2183	28.524	24	0.983385	0.966295	1.00078	0.0610619
M36098	ALS	20.0031	30.8711	9	1.09145	0.824854	1.4442	0.540276
M36099	ALS	19.5899	28.1585	8	1.4106	1.09787	1.81241	0.00714225
M37459	ALS	19.7146	27.2758	10	0.994089	0.784085	1.26034	0.960948
M00053	FTD	20.2445	77.8335	7	0.856397	0.0111022	66.0605	0.944259
M00054	FTD	19.3547	45.9258	199	0.84703	0.240519	2.98297	0.796048
M00059	FTD	21.9477	55.6594	6	0.770147	0.00614162	96.575	0.915623
M00060	FTD	17.6352	80.978	212	1.40034	0.395753	4.955	0.601499
M00063	FTD	18.4344	39.0486	44	1.83748	0.384722	8.77602	0.445699
M00064	FTD	21.77	46.475	4	140.499	0.467536	42221.3	0.0893586
M00513	FTD	19.0779	28.4367	22	0.833183	0.0672166	10.3277	0.887006
M00527	FTD	19.5016	25.8701	11	0.254003	0.024644	2.61798	0.249576
M00542	FTD	19.8757	25.8744	8	1.19482	0.690127	2.06861	0.525032
M00575	FTD	19.8453	24.9889	4	1.99004	0.43964	9.00799	0.371725
M00577	FTD	20.002	23.7779	2	6.18733	0.279549	136.946	0.248764
M00584	FTD	19.4584	334.494	26	0.766089	0.276079	2.12582	0.608863
M00599	FTD	19.6316	24.9931	13	0.619624	0.189457	2.0265	0.428537
M00606	FTD	19.8607	65.7722	18	0.338559	0.0239533	4.78522	0.422862
M01105	FTD	19.5016	26.1832	16	1.39914	0.200675	9.75499	0.734628
M01107	FTD	19.3065	26.535	17	0.775611	0.349574	1.72087	0.532011
M01110	FTD	19.7477	380.927	28	0.93024	0.324688	2.66516	0.892888
M01114	FTD	19.6692	29.6661	14	1.1572	0.600599	2.22961	0.662599
M01121	FTD	20.3544	59.031	8	1.42185	0.225616	8.96065	0.707863
M01123	FTD	19.8261	50.0579	8	1.14203	0.675797	1.92993	0.619806
M01125	FTD	18.7727	28.215	14	0.399372	0.0148035	10.7744	0.585089
M01284	FTD	19.0029	26.4829	18	2.5024	0.445254	14.0639	0.297704
M01299	FTD	18.7727	57.1759	32	0.465501	0.0711932	3.0437	0.424792
M01301	FTD	19.7477	70.7386	21	0.0666718	0.00571645	0.777603	0.0307212
M01302	FTD	18.7727	24.9932	18	3.12772	0.11058	88.4672	0.503697
M01303	FTD	19.6679	28.9857	14	3.69148	0.620189	21.9724	0.151275
M01336	FTD	19.7082	39.5743	28	1.36491	0.230735	8.0741	0.731592
M01356	FTD	19.9457	32.3388	17	0.799615	0.210765	3.03363	0.742375
M01358	FTD	19.7477	87.8667	45	4.77973	1.19297	19.1503	0.0271652
M01359	FTD	19.3547	32.8621	22	1.41435	0.258754	7.73086	0.689138
M01361	FTD	19.8247	29.82	18	1.27903	0.266645	6.13521	0.758359
M01365	FTD	19.2196	28.1145	24	0.468627	0.136235	1.612	0.229185
M01444	FTD	19.1875	31.632	16	0.534189	0.186771	1.52784	0.242231
M01493	FTD	19.3547	27.6397	11	0.585528	0.0689489	4.97243	0.623846
M01494	FTD	19.4348	62.9207	25	2.49793	0.318681	19.5796	0.383525
M01508	FTD	18.7725	40.5703	25	0.599303	0.179506	2.00086	0.405199
M01558	FTD	18.772	257.702	40	1.27829	0.362656	4.50574	0.70248
M01561	FTD	19.3547	27.2458	10	4.39686	0.799461	24.1818	0.0886368
M01564	FTD	18.621	53.4842	46	1.18727	0.31392	4.49037	0.800335
M01572	FTD	19.5583	27.1193	15	0.226733	0.0320135	1.60582	0.137342
M01573	FTD	19.6621	22.3762	9	1.56927	0.652494	3.77413	0.314225
M01585	FTD	19.257	29.0321	18	0.904952	0.0387255	21.1473	0.950472
M01604	FTD	18.7727	418.931	21	0.814482	0.138139	4.80226	0.820675
M01605	FTD	19.7454	24.6468	8	0.897734	0.450411	1.78931	0.759171
M01638	FTD	19.2781	26.9026	21	0.806717	0.182642	3.5632	0.776875
M01640	FTD	19.7182	26.0999	13	0.919414	0.624162	1.35433	0.670724
M01642	FTD	18.9429	31.632	30	1.32871	0.36196	4.87753	0.668396
M01644	FTD	19.42	32.7349	35	1.0625	0.254692	4.43248	0.933697
M01645	FTD	19.2571	30.8558	35	1.16582	0.264647	5.13562	0.839296
M01649	FTD	21.0012	45.5501	4	9.68507	0.0211052	4444.43	0.467765
M01670	FTD	19.5583	24.6243	13	0.5737	0.0632983	5.1997	0.621258
M01712	FTD	19.0361	26.1291	13	0.257536	0.0656118	1.01087	0.0518385
M01769	FTD	18.7725	33.904	39	0.332962	0.0738877	1.50043	0.152224
M01898	FTD	19.2571	261.78	40	1.44003	0.498534	4.15954	0.500443
M02132	FTD	18.7727	42.6216	43	3.04205	0.664725	13.9217	0.15166
M02137	FTD	19.7737	760.709	31	1.68101	1.06509	2.6531	0.0256928
M02342	FTD	19.3	26.0898	15	0.710664	0.21668	2.33083	0.573023
M02730	FTD	19.8375	77.6795	19	0.954115	0.145235	6.26801	0.960995
M02734	FTD	19.2569	33.3732	47	0.234566	0.0621623	0.885121	0.0323493
M03127	FTD	19.3378	65.2676	23	1.0383	0.279958	3.85081	0.955183
M03141	FTD	19.2571	79.9229	30	1.01955	0.31473	3.30276	0.974249
M03147	FTD	19.945	25.9068	4	2.09417	0.0992241	44.1986	0.634741
M11438	FTD	20.227	26.5549	4	2.07449	0.0148471	289.856	0.77217
M12017	FTD	19.0934	29.8179	14	0.435542	0.0942221	2.0133	0.287289
M12035	FTD	18.7727	30.8558	40	0.357422	0.0946891	1.34916	0.128995
M12067	FTD	18.7725	30.9327	25	2.45379	0.281145	21.4163	0.416761
M12129	FTD	19.0946	34.6689	21	1.59031	0.435598	5.80603	0.482573
M12261	FTD	19.5544	25.5906	11	1.28326	0.765153	2.15219	0.344484
M12593	FTD	19.8826	30.566	22	8.1856	0.640386	104.631	0.105847
M12626	FTD	19.2689	24.6101	10	1.14993	0.101649	13.0089	0.910136
M12768	FTD	19.4197	23.0334	18	0.472181	0.123133	1.81069	0.273859
M12774	FTD	19.2571	72.2304	32	1.09311	0.281445	4.24558	0.897671
M15122	FTD	19.0949	27.9312	15	0.272511	0.0498929	1.48843	0.1334
M15140	FTD	18.7727	106.473	41	1.55919	0.473651	5.1326	0.464987
M15335	FTD	19.9402	23.3208	12	1.0622	0.68751	1.64109	0.785731
M15365	FTD	19.1998	23.8637	13	0.341879	0.0500895	2.33345	0.273398
M15488	FTD	18.9429	33.2228	16	41.1951	2.19663	772.565	0.0129148
M15500	FTD	19.2571	293.186	223	1.23919	0.403663	3.80412	0.707851
M15506	FTD	19.1354	29.152	22	0.658616	0.0297132	14.5987	0.791657
M15630	FTD	19.3137	1859.25	18	0.761802	0.515747	1.12525	0.171612
M15650	FTD	19.2196	30.6662	8	3.03087	0.0241181	380.884	0.652984
M15676	FTD	19.2571	67.8016	35	0.148387	0.0332633	0.661955	0.0123949
M15677	FTD	19.5897	21.9757	8	2.03518	0.935455	4.42776	0.0731769
M15749	FTD	19.5821	45.3222	11	0.794682	0.250124	2.52482	0.696798
M15958	FTD	19.5427	22.5021	8	0.449871	0.0932607	2.17009	0.319763
M15990	FTD	19.1038	25.8825	16	1.24842	0.626124	2.4892	0.528584
M15996	FTD	19.8517	24.1891	5	3.60743	0.616905	21.0949	0.154481
M16634	FTD	19.7651	21.844	9	1.49572	0.502262	4.45421	0.469608
M16816	FTD	19.6039	24.2263	13	0.733921	0.119439	4.50977	0.738416
M16818	FTD	19.5014	24.9929	6	0.850572	0.136103	5.31562	0.862569
M16821	FTD	19.0945	28.4337	19	0.627749	0.165277	2.3843	0.49408
M16822	FTD	19.0038	47.6817	18	0.754382	0.15894	3.58056	0.722801
M16823	FTD	19.5192	23.5558	10	0.854381	0.539595	1.3528	0.502091
M17805	FTD	19.6069	23.2601	9	1.40838	0.307386	6.45287	0.659249
M17807	FTD	19.531	45.1143	22	0.742524	0.370739	1.48714	0.400864
M17945	FTD	19.0779	27.2641	31	0.411158	0.082129	2.05836	0.279472
M18283	FTD	19.9986	27.0591	10	0.922062	0.377816	2.2503	0.858526
M18349	FTD	19.4196	50.0281	19	1.5892	0.425085	5.94127	0.491142
M18357	FTD	19.7133	25.2431	6	0.502921	0.210496	1.20159	0.121936
M18369	FTD	19.4584	28.0201	33	0.620487	0.122607	3.14014	0.564032
M18467	FTD	19.7477	92.5505	10	0.749215	0.230152	2.43892	0.631611
M18474	FTD	19.4008	24.6112	9	1.1965	0.819218	1.74754	0.353288
M18476	FTD	20.051	23.8181	8	0.65177	0.303765	1.39846	0.271784
M18477	FTD	20.463	24.2665	7	0.775974	0.499866	1.20459	0.258314
M18494	FTD	19.4677	25.1297	12	1.12314	0.635656	1.98447	0.689268
M18497	FTD	20.2393	25.8785	14	1.19084	0.763471	1.85742	0.441266
M18929	FTD	19.2196	28.8143	13	1.27228	0.234705	6.89675	0.780059
M19323	FTD	19.9734	29.2792	5	1.70415	0.274213	10.5907	0.567398
M19324	FTD	19.8201	20.1446	2	0.549175	0.0336556	8.96117	0.673978
M19362	FTD	19.8712	28.1095	20	2.30387	0.321886	16.4897	0.405906
M19364	FTD	18.9792	30.2385	17	0.408045	0.114681	1.45186	0.166296
M19368	FTD	19.5578	26.1593	12	1.49083	0.214871	10.3437	0.686172
M19396	FTD	20.1745	32.1237	7	1.36748	0.295339	6.33169	0.688981
M19414	FTD	19.7449	25.1349	11	0.91125	0.183542	4.52418	0.909493
M19415	FTD	20.3627	22.9241	5	0.689512	0.144932	3.28036	0.640378
M19934	FTD	18.7727	53.7632	38	0.485882	0.142723	1.65412	0.248178
M20489	FTD	18.9429	33.9042	35	5.26964	0.825054	33.6573	0.0789696
M20675	FTD	19.0949	44.0293	31	1.97838	0.671843	5.82574	0.215651
M21044	FTD	19.2654	29.1521	17	0.610415	0.170534	2.18494	0.448045
M21047	FTD	19.2782	33.7412	16	1.76478	0.206949	15.0493	0.603458
M21049	FTD	19.7159	25.8337	10	0.892654	0.487094	1.63589	0.7133
M21127	FTD	20.0779	26.116	12	2.61487	0.535664	12.7646	0.23473
M21184	FTD	20.0145	36.8131	16	0.794382	0.36385	1.73435	0.563392
M21188	FTD	19.4193	30.0375	26	1.12481	0.336287	3.76223	0.848592
M21630	FTD	18.8839	401.067	22	0.902311	0.316159	2.57517	0.84765
M22030	FTD	19.5573	76.218	18	0.623072	0.156199	2.48541	0.502729
M22032	FTD	19.0864	23.3529	17	0.490133	0.151891	1.5816	0.232872
M22116	FTD	19.8999	41.0652	12	1.3332	0.165843	10.7176	0.786831
M22130	FTD	19.6054	88.9396	19	1.12308	0.30308	4.1616	0.862113
M22138	FTD	19.6023	69.4093	8	1.1613	0.3202	4.21179	0.820041
M22175	FTD	20.2394	82.7668	6	0.428335	0.149331	1.22862	0.114795
M22177	FTD	18.4843	42.2371	56	1.62838	0.566302	4.68233	0.365578
M22189	FTD	19.1997	40.1001	7	0.907287	0.179353	4.58966	0.906357
M22481	FTD	19.0779	146.639	35	1.18302	0.358922	3.89925	0.78241
M22548	FTD	19.2195	29.2319	14	0.921238	0.175241	4.84292	0.922816
M22649	FTD	19.5576	25.7383	12	0.643701	0.0699539	5.9232	0.697257
M22842	FTD	19.7977	22.2298	9	1.03863	0.641714	1.68106	0.87738
M24074	FTD	19.4357	27.1587	20	0.715977	0.164243	3.12113	0.656485
M25459	FTD	19.0779	81.9807	27	0.734365	0.280144	1.92505	0.53005
M25599	FTD	19.2912	35.9887	20	0.566228	0.151272	2.11946	0.398359
M27256	FTD	18.7726	25.5516	33	11.7898	1.83938	75.5683	0.00924375
M27273	FTD	19.9699	25.5677	12	0.35171	0.0322419	3.83663	0.391393
M27278	FTD	19.5142	159.437	22	2.2048	0.606678	8.01275	0.229794
M27447	FTD	19.573	44.5292	15	0.840484	0.428074	1.65021	0.61368
M27513	FTD	19.2918	40.0999	19	1.19478	0.388194	3.67728	0.756364
M27531	FTD	20.0532	28.6774	16	1.19101	0.707141	2.00597	0.511068
M27672	FTD	20.2886	24.9716	5	2.01886	0.4937	8.25562	0.328228
M27710	FTD	19.4343	254.803	20	0.958544	0.542851	1.69256	0.883961
M27716	FTD	19.5337	686.389	19	1.30024	0.927528	1.82272	0.12765
M27718	FTD	19.7721	105.034	12	1.56234	0.5419	4.50436	0.408863
M27722	FTD	19.54	23.185	6	0.928728	0.144437	5.97171	0.93793
M27738	FTD	19.477	24.9932	17	0.396909	0.1327	1.18716	0.0983215
M30805	FTD	19.2192	28.3093	16	2.74077	1.02163	7.35278	0.0452342
M31453	FTD	19.5629	24.9931	12	0.713808	0.106111	4.80181	0.728845
M31522	FTD	19.7523	22.5479	3	0.532991	0.192839	1.47314	0.225086
M31548	FTD	19.8783	21.989	11	1.47754	0.65595	3.32819	0.346081
M31555	FTD	19.5752	23.7591	11	1.48655	0.549012	4.02513	0.435335
M31591	FTD	19.4242	508.646	26	0.651817	0.458484	0.926673	0.0171166
M31787	FTD	19.8982	40.1551	14	0.752333	0.48661	1.16316	0.200511
M32197	FTD	19.6988	51.7152	23	0.548334	0.149249	2.01456	0.36545
M32198	FTD	19.0949	99.26	21	2.71189	0.648118	11.3472	0.171905
M32315	FTD	18.7727	122.264	39	0.222364	0.0602508	0.820666	0.0240322
M32319	FTD	18.9291	21.7531	5	0.795378	0.183173	3.45372	0.759924
M32322	FTD	20.1162	26.7364	3	0.953818	0.0422199	21.5484	0.976286
M32328	FTD	19.7052	453.695	20	0.985955	0.40004	2.43003	0.975482
M32338	FTD	19.0044	686.615	33	0.839965	0.383283	1.84078	0.663088
M32339	FTD	19.2571	59.3645	42	0.72277	0.175208	2.98159	0.65341
M32346	FTD	19.5249	34.9217	14	0.779996	0.479382	1.26912	0.317117
M32348	FTD	18.7727	67.5072	47	1.0942	0.296474	4.03838	0.892517
M32379	FTD	19.6058	87.8619	13	3.41874	1.17424	9.95351	0.0241616
M32388	FTD	19.7354	31.6283	6	2.42493	0.660858	8.89796	0.181721
M32393	FTD	19.686	33.5342	13	3.37607	0.475248	23.983	0.223871
M32405	FTD	19.3085	23.6221	14	0.961442	0.344847	2.68053	0.940085
M32412	FTD	19.9318	1912.98	45	1.17293	0.878503	1.56603	0.279435
M32418	FTD	19.1354	63.9826	14	2.1626	0.723482	6.46433	0.167403
M32425	FTD	19.3547	56.2347	24	0.681704	0.343517	1.35283	0.27319
M32452	FTD	19.5404	147.537	41	0.983216	0.336857	2.8698	0.975292
M32489	FTD	19.2571	28.0431	35	1.06625	0.230741	4.92711	0.934535
M32492	FTD	18.7727	32.7349	46	0.462022	0.158496	1.34682	0.157211
M32497	FTD	19.2498	273.749	28	1.25566	0.552539	2.85351	0.586742
M32504	FTD	19.3289	56.8793	10	0.839116	0.247152	2.84891	0.778515
M32518	FTD	19.42	35.9902	42	2.46627	0.471342	12.9046	0.285013
M32549	FTD	21.2099	56.1318	11	0.656611	0.342848	1.25752	0.204504
M32553	FTD	19.6937	26.8788	15	0.475841	0.194764	1.16256	0.103212
M32557	FTD	19.7596	23.6922	11	1.4061	0.53683	3.68293	0.48785
M32560	FTD	19.5981	24.7546	10	1.12375	0.675152	1.87042	0.653553
M32564	FTD	19.5013	50.9387	20	0.99386	0.618902	1.59598	0.979667
M32578	FTD	19.5507	104.209	20	1.45015	0.743356	2.82897	0.275671
M32586	FTD	19.7817	426.106	19	1.19603	0.783913	1.82481	0.406266
M32587	FTD	19.8376	66.1625	11	1.14271	0.297897	4.38335	0.845799
M32593	FTD	19.5359	26.3949	13	0.777667	0.273426	2.21181	0.637281
M32616	FTD	19.5084	23.5377	11	1.16988	0.658583	2.07813	0.592496
M32632	FTD	19.2571	49.6249	26	1.74605	0.636662	4.78856	0.278901
M32634	FTD	19.2571	44.4286	43	0.881845	0.231278	3.3624	0.853908
M32635	FTD	19.6069	157.998	14	1.40341	0.46338	4.25039	0.548885
M32644	FTD	19.5403	33.3735	38	1.2873	0.317007	5.22746	0.723929
M32651	FTD	19.492	31.1616	24	0.448693	0.13998	1.43824	0.177507
M32654	FTD	19.0044	108.964	29	1.08634	0.333604	3.53751	0.890655
M32672	FTD	19.2919	107.9	18	1.11181	0.495762	2.49336	0.797024
M32675	FTD	19.4584	25.7681	18	0.432688	0.032695	5.72622	0.524958
M32691	FTD	19.4822	29.7435	15	0.910185	0.46017	1.80028	0.78683
M32698	FTD	19.3547	82.368	17	0.593216	0.108447	3.24495	0.546974
M32709	FTD	19.42	117.117	31	1.41273	0.577996	3.45299	0.448596
M32729	FTD	19.0772	35.3603	48	1.45279	0.41252	5.11632	0.56094
M32735	FTD	19.5888	54.5914	15	0.798501	0.402222	1.5852	0.520127
M32739	FTD	19.8987	24.0021	8	1.21465	0.182129	8.10068	0.84081
M32740	FTD	18.7726	72.2303	50	0.368287	0.0978656	1.38593	0.1396
M32753	FTD	19.5535	64.2495	14	0.592329	0.304336	1.15285	0.123235
M32754	FTD	19.5008	28.8353	14	1.41521	0.880042	2.27582	0.151926
M32755	FTD	19.7242	27.7088	23	1.36293	0.589771	3.14967	0.468762
M32757	FTD	19.531	653.261	21	1.27868	0.826195	1.97898	0.269952
M32758	FTD	19.5305	516.459	19	1.38936	0.837449	2.30499	0.202963
M32759	FTD	19.6064	537.685	21	1.52506	0.916299	2.53827	0.104447
M32761	FTD	19.6447	92.4738	19	1.23272	0.509397	2.98315	0.642637
M32762	FTD	19.5826	45.19	14	1.46948	0.878851	2.45704	0.142218
M32769	FTD	19.6629	29.8865	6	0.969621	0.377116	2.49304	0.948949
M32786	FTD	19.6216	57.7889	19	0.74238	0.425777	1.2944	0.293619
M32787	FTD	19.6297	77.4174	11	2.03123	0.631375	6.5348	0.234585
M32795	FTD	19.9573	73.8629	11	0.551475	0.179699	1.69241	0.298205
M32800	FTD	19.6744	34.2312	10	1.40787	0.844757	2.34636	0.189314
M32802	FTD	19.6367	29.5799	7	3.12239	1.1211	8.69623	0.0293548
M32808	FTD	20.2435	137.94	18	1.8904	1.10064	3.24684	0.021031
M32814	FTD	19.2194	26.9816	14	1.57887	0.267432	9.32139	0.614168
M32836	FTD	21.6682	49.5654	6	0.494845	0.18886	1.29658	0.152293
M32838	FTD	19.7732	30.8226	10	0.804117	0.242716	2.66404	0.721305
M32846	FTD	19.5573	1431.87	24	1.60444	1.25008	2.05923	0.000204835
M32847	FTD	19.3286	643.129	20	1.56419	0.933254	2.62167	0.0895444
M32854	FTD	19.4564	25.7169	7	1.32282	0.715909	2.44423	0.371809
M32855	FTD	19.4763	400.619	21	2.22018	1.30346	3.78161	0.00333204
M32857	FTD	19.7908	23.9777	8	0.392676	0.149524	1.03124	0.0577584
M32863	FTD	19.6839	24.8833	11	1.41717	0.941912	2.13223	0.0943583
M32867	FTD	18.5511	47.0076	19	5.79695	0.327278	102.679	0.230792
M32869	FTD	19.393	25.1381	14	1.3861	0.542486	3.5416	0.495145
M32910	FTD	18.7727	817.065	58	0.833938	0.342927	2.02799	0.688772
M32980	FTD	20.2445	104.132	8	0.664944	0.160428	2.75608	0.573789
M33084	FTD	19.5385	54.1935	9	0.661995	0.333683	1.31333	0.23794
M33131	FTD	19.346	55.1091	13	0.527246	0.205119	1.35526	0.183894
M33132	FTD	18.7727	296.975	35	2.3418	0.47425	11.5636	0.296322
M33137	FTD	19.8515	93.7284	15	0.867385	0.592513	1.26977	0.464368
M33138	FTD	19.6994	516.586	24	1.54359	0.848379	2.8085	0.155162
M33140	FTD	19.3547	22.6962	8	1.33544	0.175948	10.136	0.779693
M33144	FTD	19.5527	172.397	9	1.61677	0.99189	2.63532	0.0539428
M33150	FTD	19.5981	25.7677	9	0.838406	0.539615	1.30264	0.433061
M33163	FTD	19.892	28.8432	18	9.53466	2.59081	35.0893	0.000693975
M33165	FTD	19.4023	68.7436	12	0.363783	0.143747	0.920631	0.0327998
M33188	FTD	20.0171	28.5791	3	1.15291	0.636775	2.08741	0.638497
M33190	FTD	19.6437	25.1716	17	0.802448	0.560177	1.1495	0.230065
M33192	FTD	19.5196	24.8883	11	1.14198	0.688479	1.89422	0.607092
M33194	FTD	19.6387	23.8391	10	1.17844	0.719207	1.9309	0.514597
M33195	FTD	20.1577	22.9541	5	0.725176	0.384804	1.36662	0.320271
M33197	FTD	20.6144	24.8658	8	0.926532	0.562137	1.52714	0.764716
M33203	FTD	19.5661	21.202	8	1.0671	0.725402	1.56974	0.741575
M33204	FTD	19.4745	22.7184	12	0.471357	0.104175	2.13274	0.328786
M33221	FTD	19.5692	25.2071	16	1.1371	0.464611	2.78295	0.778447
M33228	FTD	18.8722	431.594	21	0.867023	0.33152	2.26752	0.771126
M33230	FTD	18.9795	40.5925	15	1.28776	0.290644	5.70568	0.739139
M33250	FTD	19.703	210.409	20	1.75347	1.08286	2.83937	0.0223908
M33353	FTD	19.5044	27.4635	17	0.878854	0.638917	1.2089	0.427303
M33359	FTD	19.5662	30.9297	8	0.693528	0.436716	1.10136	0.120941
M33363	FTD	19.9118	26.2051	8	1.65358	0.430893	6.34573	0.463566
M33364	FTD	19.777	23.7301	8	0.44673	0.0700695	2.84814	0.393902
M33380	FTD	19.0948	28.6459	36	0.731194	0.170225	3.14081	0.673761
M33389	FTD	18.6209	45.3726	58	5.88641	1.74497	19.857	0.00427152
M33390	FTD	19.5513	28.1381	13	0.672231	0.367013	1.23128	0.19838
M33391	FTD	19.5061	31.0895	10	0.966638	0.762196	1.22592	0.779573
M33408	FTD	19.6022	26.9057	11	0.731022	0.377561	1.41538	0.352668
M33415	FTD	19.5579	327.235	22	1.81951	1.1526	2.8723	0.0101793
M33420	FTD	19.5174	26.8002	12	0.959427	0.44469	2.06998	0.915923
M33422	FTD	19.7477	34.0185	33	0.609874	0.126897	2.93108	0.536984
M33441	FTD	20.7593	217.503	18	1.62283	0.823688	3.1973	0.161704
M33442	FTD	19.2571	27.2642	25	0.387078	0.0349465	4.28739	0.439192
M33443	FTD	19.6913	22.3592	9	1.54541	0.245484	9.72894	0.642851
M33447	FTD	19.3547	58.4428	13	1.32595	0.43869	4.00774	0.617124
M33453	FTD	19.6531	30.1237	15	4.53495	1.49114	13.7919	0.00772147
M33477	FTD	18.9795	54.5807	43	0.198373	0.0453093	0.868511	0.0317867
M33488	FTD	19.4839	29.0758	17	1.17039	0.585252	2.34054	0.656356
M33507	FTD	19.708	2912.88	35	0.989739	0.779294	1.25701	0.932607
M33508	FTD	19.7881	215.977	15	1.02345	0.616853	1.69806	0.928492
M33509	FTD	20.675	33.9626	7	2.60557	0.467344	14.5268	0.274696
M33510	FTD	19.8989	48.4497	22	0.56258	0.167985	1.88408	0.350934
M33515	FTD	18.9793	44.4319	46	1.17969	0.305433	4.55639	0.81057
M33531	FTD	19.5759	22.777	9	1.06367	0.472131	2.39636	0.881592
M33587	FTD	19.545	27.3877	15	0.890237	0.277021	2.86087	0.845233
M33609	FTD	19.4797	28.0968	14	0.822942	0.562772	1.20339	0.314865
M33610	FTD	19.5801	32.509	21	1.1614	0.969061	1.39193	0.105285
M33627	FTD	19.9076	23.0701	10	1.70686	0.377994	7.70747	0.486983
M33633	FTD	19.8479	25.718	8	0.810193	0.371303	1.76787	0.596999
M33637	FTD	19.4854	22.2098	10	0.759782	0.373097	1.54724	0.448987
M33638	FTD	19.7304	23.4456	9	0.632891	0.166758	2.40199	0.501433
M33652	FTD	19.5842	27.977	9	1.31408	0.566123	3.05022	0.524953
M33653	FTD	19.4875	26.5822	11	0.908027	0.351136	2.34813	0.842239
M33658	FTD	19.7551	27.3122	7	0.844668	0.401927	1.77511	0.655956
M33666	FTD	19.1345	99.1368	29	1.32928	0.429982	4.10944	0.621102
M33675	FTD	19.5238	25.4853	8	0.726507	0.295576	1.78571	0.486225
M33683	FTD	19.7184	27.2081	10	1.16199	0.788589	1.71219	0.447803
M33751	FTD	19.2401	28.3299	21	1.12893	0.968571	1.31583	0.120798
M33782	FTD	19.9165	25.9066	12	0.698543	0.448142	1.08886	0.113174
M33801	FTD	19.6468	84.5442	8	0.609995	0.251927	1.47699	0.27327
M33821	FTD	19.3547	78.9909	20	2.06673	0.780998	5.46913	0.143706
M33822	FTD	19.9553	23.7062	7	0.463519	0.0891447	2.41012	0.360645
M33833	FTD	19.7059	24.856	7	2.53007	0.847072	7.55691	0.0963768
M33835	FTD	19.8904	27.607	9	0.806472	0.492215	1.32137	0.393221
M33864	FTD	19.6325	22.8623	9	0.838992	0.407264	1.72838	0.63402
M33871	FTD	19.7765	33.6297	10	0.653784	0.207739	2.05755	0.467525
M33877	FTD	19.3766	26.763	15	1.01144	0.806783	1.26802	0.921436
M33883	FTD	19.4258	100.458	14	0.800711	0.526925	1.21675	0.29786
M33884	FTD	19.269	110.989	12	0.769061	0.325204	1.81872	0.549881
M33885	FTD	19.6254	25.3997	11	1.09239	0.629217	1.8965	0.75355
M33892	FTD	19.6435	30.0506	31	1.22049	0.491984	3.02774	0.667317
M33901	FTD	19.6254	192.55	18	1.81287	0.965065	3.40548	0.0643972
M33910	FTD	19.7169	22.2703	10	0.419225	0.143153	1.22771	0.112794
M33936	FTD	19.6936	135.884	20	1.2992	0.520395	3.24355	0.574982
M33937	FTD	20.2444	129.039	15	0.563044	0.220272	1.43921	0.230303
M33939	FTD	19.3078	24.4077	13	2.43553	0.400332	14.8172	0.333917
M33941	FTD	19.4491	168.954	18	0.669388	0.296091	1.51332	0.334812
M33955	FTD	19.42	30.2418	31	1.44711	0.242902	8.62135	0.684837
M33957	FTD	19.6488	24.801	8	2.83237	0.673508	11.9112	0.155425
M33960	FTD	19.6955	24.9932	15	5.34332	0.975563	29.2662	0.0534275
M33961	FTD	19.6996	23.8637	12	0.202787	0.0451657	0.910477	0.0373095
M33968	FTD	19.7247	39.4994	15	0.804792	0.321081	2.01722	0.643207
M33969	FTD	19.5535	63.9825	9	1.68276	0.46774	6.05394	0.425609
M33971	FTD	19.7687	22.6143	6	0.921267	0.118442	7.16583	0.937547
M33972	FTD	19.7187	30.5042	9	0.948137	0.220271	4.08117	0.942991
M33973	FTD	19.6069	339.941	15	0.474803	0.27162	0.829976	0.00894982
M34035	FTD	19.5187	22.5012	4	0.669206	0.0538461	8.31698	0.754733
M34040	FTD	19.4346	39.3994	14	1.64874	0.54405	4.99651	0.376749
M34062	FTD	19.5404	37.9094	27	0.572598	0.0559069	5.86455	0.63855
M34106	FTD	19.6291	252.147	18	1.45233	0.793898	2.65683	0.225903
M34112	FTD	20.0067	24.2945	15	1.35319	0.639277	2.86436	0.429207
M34123	FTD	19.2917	87.3258	19	2.71587	0.617958	11.936	0.185927
M34214	FTD	19.7187	134.933	20	1.51985	0.512625	4.50611	0.450296
M34221	FTD	19.5989	58.761	10	1.74028	0.490923	6.16917	0.390848
M34244	FTD	19.42	37.0258	24	0.443573	0.142731	1.37852	0.159992
M34245	FTD	19.5124	26.0881	18	0.522882	0.22226	1.23011	0.137416
M34283	FTD	19.1354	182.184	43	1.24552	0.360125	4.30772	0.72875
M34289	FTD	19.3804	26.1219	15	1.14136	0.437592	2.977	0.786915
M34306	FTD	19.0947	49.5258	23	0.790186	0.459264	1.35955	0.395018
M34314	FTD	19.5769	35.0013	9	0.957544	0.493614	1.8575	0.897891
M34322	FTD	19.0642	34.4595	27	1.0802	0.889177	1.31227	0.437159
M34327	FTD	19.768	24.969	9	0.842553	0.519425	1.3667	0.487579
M34329	FTD	19.3702	22.4293	11	0.652983	0.380536	1.12049	0.121858
M34336	FTD	19.6467	28.4332	21	1.16607	0.664159	2.0473	0.592654
M34338	FTD	19.4265	31.0276	21	1.02331	0.886765	1.18088	0.752487
M34339	FTD	19.4634	26.3895	15	0.984111	0.687714	1.40825	0.930196
M34344	FTD	19.3527	28.2084	10	0.632114	0.399842	0.999314	0.0496577
M34350	FTD	19.3992	32.4714	14	1.38484	0.906346	2.11595	0.132242
M34359	FTD	18.7722	50.5981	43	0.648518	0.170868	2.46141	0.524534
M34407	FTD	20.0608	179.71	25	0.896361	0.364932	2.20168	0.811391
M34409	FTD	19.4579	42.0408	6	0.629248	0.0856076	4.62521	0.649001
M34416	FTD	19.5013	46.4166	12	2.22486	0.66837	7.40608	0.192469
M34419	FTD	19.7307	26.5549	14	3.41567	0.590317	19.7636	0.17023
M34420	FTD	19.6923	211.802	23	1.03098	0.792856	1.34063	0.819865
M34441	FTD	19.4313	26.4584	17	1.24809	0.614568	2.53466	0.539807
M34453	FTD	18.5511	18.5511	1	10.1902	1.01263e-09	1.02546e+11	0.8434
M34456	FTD	19.2898	25.8672	25	0.673728	0.247625	1.83305	0.439321
M34469	FTD	20.0298	28.7202	10	0.593885	0.192602	1.83124	0.364436
M34481	FTD	19.8189	1169.83	25	0.772259	0.469545	1.27013	0.308667
M34499	FTD	19.4896	24.3801	6	0.559487	0.218865	1.43022	0.225237
M34513	FTD	19.4763	23.3467	9	1.20293	0.526444	2.74872	0.661232
M34516	FTD	19.557	29.2266	14	0.980956	0.826357	1.16448	0.826076
M34527	FTD	19.3244	73.7376	14	0.677848	0.181133	2.5367	0.563615
M34530	FTD	19.7961	23.5884	5	1.02659	0.266366	3.95656	0.969587
M34533	FTD	19.3929	67.126	16	0.567664	0.260902	1.23511	0.153411
M34534	FTD	19.3521	37.7194	13	1.16794	0.426708	3.19675	0.762515
M34535	FTD	19.8505	28.0572	8	1.02346	0.847009	1.23667	0.810178
M34539	FTD	19.4171	36.5451	17	1.71037	0.640804	4.56513	0.283947
M34674	FTD	19.4166	44.0358	11	0.923253	0.349769	2.43703	0.871903
M34732	FTD	19.7472	22.0313	3	3.0211	0.117478	77.6918	0.504547
M34761	FTD	20.094	26.6861	17	1.28564	0.465081	3.55397	0.628157
M34878	FTD	19.404	23.6206	9	2.53415	1.07769	5.95893	0.0330495
M34912	FTD	19.5391	33.5066	44	2.63636	0.785637	8.84684	0.116559
M35114	FTD	19.1861	22.9114	10	1.36923	0.391538	4.78824	0.622738
M35126	FTD	19.6357	30.0934	17	0.793124	0.372025	1.69087	0.548454
M35127	FTD	18.8839	30.0222	18	1.16594	0.293763	4.62758	0.827208
M35137	FTD	19.4424	35.9853	58	1.7582	0.57067	5.41692	0.325658
M35159	FTD	20.6781	23.7024	7	1.29034	0.486088	3.42524	0.60883
M35160	FTD	19.8375	43.9259	9	4.18516	0.825021	21.2304	0.0840223
M35186	FTD	19.42	185.328	29	2.42269	0.864151	6.7921	0.0924975
M35187	FTD	19.707	303.716	12	2.28422	1.45724	3.58051	0.000315933
M35189	FTD	19.7238	602.909	23	1.6807	0.921924	3.06399	0.0901446
M35193	FTD	18.9789	163.425	26	1.78363	0.697999	4.55781	0.226717
M35240	FTD	19.4082	20.8237	6	1.86119	0.121918	28.4127	0.655085
M35253	FTD	20.0781	26.5548	23	0.463532	0.148524	1.44665	0.185476
M35254	FTD	19.5014	28.9859	15	2.21993	0.399406	12.3386	0.362163
M35255	FTD	19.6378	31.7402	11	0.558136	0.148285	2.10079	0.388519
M35257	FTD	19.1869	36.8831	21	0.379523	0.103182	1.39595	0.144847
M35270	FTD	19.0948	33.3735	37	1.30268	0.244338	6.94519	0.756818
M35305	FTD	19.1585	23.7669	10	1.00641	0.324425	3.122	0.991179
M35326	FTD	19.2557	40.8037	42	0.334298	0.0839563	1.33111	0.120123
M35327	FTD	19.6857	24.9928	20	0.99323	0.0954443	10.3359	0.995465
M35331	FTD	19.476	20.9684	6	2.82397	0.340531	23.4188	0.336117
M35397	FTD	19.9807	28.6462	27	2.00369	0.271817	14.7701	0.495309
M35431	FTD	19.1647	30.2414	24	0.94287	0.205556	4.32486	0.939662
M35433	FTD	19.7667	68.8192	7	0.385375	0.0887456	1.67348	0.203122
M35439	FTD	18.8838	191.821	43	1.45538	0.648399	3.26671	0.362979
M35451	FTD	19.4151	32.0137	15	1.01089	0.889215	1.14921	0.868542
M35464	FTD	19.0041	50.6797	16	3.56313	0.598115	21.2265	0.162868
M35472	FTD	19.7241	37.4314	17	1.23252	0.558867	2.71818	0.604405
M35551	FTD	19.5212	31.7021	13	0.947056	0.489559	1.83209	0.87164
M35626	FTD	19.4023	27.8474	6	0.869274	0.210798	3.58464	0.846323
M35628	FTD	19.4348	36.5375	10	1.6861	0.338085	8.40899	0.523985
M35631	FTD	18.7726	76.2845	25	1.77966	0.569481	5.56151	0.321443
M35635	FTD	19.8381	23.4965	9	0.986582	0.612373	1.58946	0.955726
M35669	FTD	19.8359	264.231	21	1.83563	1.06113	3.17542	0.0298435
M35675	FTD	18.621	34.0185	43	0.385012	0.0997566	1.48596	0.165996
M35678	FTD	19.747	229.015	24	1.86456	1.03421	3.36159	0.0382824
M35718	FTD	19.2196	88.336	23	1.93975	0.555001	6.77947	0.299384
M35754	FTD	19.1726	38.559	42	1.44543	0.490277	4.26138	0.504236
M35854	FTD	19.402	28.6287	11	0.496715	0.15508	1.59096	0.238734
M35977	FTD	19.54	24.0553	8	1.00592	0.216035	4.68383	0.994001
M35978	FTD	19.4633	25.2713	18	0.692421	0.296798	1.6154	0.395104
M36009	FTD	19.6396	41.8513	12	0.85917	0.364631	2.02444	0.728511
M36103	FTD	19.6173	29.2146	10	0.78963	0.321191	1.94126	0.606811
M36115	FTD	20.6872	93.6977	9	0.607242	0.276887	1.33174	0.213147
M36131	FTD	19.6438	58.7117	15	1.72055	0.878614	3.36929	0.113522
M36134	FTD	19.5019	91.3662	11	1.04896	0.505756	2.17557	0.897822
M36230	FTD	19.7761	70.4479	17	0.641315	0.343462	1.19747	0.163216
M36300	FTD	19.9699	23.8319	8	0.971914	0.215183	4.38983	0.97046
M36376	FTD	20.3556	26.6595	5	0.794845	0.274087	2.30503	0.672532
M36399	FTD	19.4193	47.6179	12	1.04918	0.414048	2.65858	0.919391
M36468	FTD	20.2872	23.8257	14	0.845304	0.485415	1.47202	0.55263
M36515	FTD	19.2405	27.0326	9	195.173	0.304965	124908	0.109656
M36552	FTD	19.4582	26.2582	19	0.703007	0.090047	5.48845	0.736806
M36553	FTD	19.1724	198.897	22	2.54989	1.07624	6.04135	0.0334277
M36559	FTD	19.5397	24.955	17	1.67683	0.859882	3.26995	0.12928
M36585	FTD	19.5063	24.8361	12	1.37544	0.60527	3.12562	0.446571
M36589	FTD	19.3347	34.9528	18	1.07812	0.721217	1.61163	0.713856
M36673	FTD	19.5732	27.2613	11	0.761279	0.197369	2.93636	0.692094
M36738	FTD	20.338	26.7475	7	0.741209	0.335288	1.63856	0.459362
M36754	FTD	19.6954	87.0858	11	2.31248	0.751067	7.11997	0.144
M36756	FTD	19.6289	24.758	11	1.62693	0.609282	4.3443	0.331438
M36776	FTD	19.4584	24.9932	14	0.442948	0.0564003	3.47875	0.438699
M36802	FTD	19.8457	23.3503	8	1.14244	0.156944	8.31608	0.895395
M36808	FTD	19.2568	29.6334	36	0.983001	0.187124	5.16391	0.983838
M36850	FTD	19.9946	27.8915	10	0.74561	0.344297	1.61469	0.456511
M37004	FTD	19.883	21.1746	7	2.35229	0.590713	9.36707	0.225022
M37058	FTD	18.6204	413.318	49	0.838153	0.299384	2.34649	0.736771
M37097	FTD	19.4222	125.087	15	0.96768	0.674374	1.38855	0.858475
M37104	FTD	19.3235	26.3822	13	1.18006	0.606793	2.29493	0.625636
M37112	FTD	19.6702	24.9227	10	0.784341	0.569367	1.08048	0.137193
M37190	FTD	19.6431	128.003	20	0.980453	0.613287	1.56744	0.934277
M37202	FTD	19.8052	415.857	23	1.24512	0.862633	1.7972	0.241673
M37203	FTD	19.4584	77.7391	19	1.55994	0.685431	3.55017	0.289258
M37253	FTD	19.4191	24.2023	10	0.510597	0.128692	2.02584	0.339102
M37506	FTD	18.7727	35.9872	43	4.55355	1.00768	20.5769	0.0488498
M38150	FTD	20.6078	25.7115	3	0.186422	0.0167017	2.08081	0.172361
M38178	FTD	19.1649	285.156	12	0.573019	0.187246	1.75358	0.329185
M38768	FTD	19.6047	28.8823	14	0.848945	0.154064	4.67796	0.850821
M00553	FTD	19.565	24.6988	12	1.16823	0.934966	1.4597	0.171235
M00569	FTD	19.7709	56.0603	13	1.1606	0.78848	1.70833	0.450193
M01515	FTD	19.7973	28.452	12	1.03021	0.84298	1.25902	0.771184
M15753	FTD	19.4666	23.8927	14	1.12594	0.451543	2.8076	0.799147
M15778	FTD	19.0779	27.2641	37	1.10504	0.206268	5.92	0.907154
M17799	FTD	18.1068	43.9373	92	0.985238	0.850026	1.14196	0.843469
M18254	FTD	19.6859	25.91	10	1.183	0.636677	2.19812	0.59497
M18281	FTD	19.5491	27.6527	12	1.19477	0.984789	1.44952	0.0711478
M18335	FTD	19.8255	27.0438	4	1.40392	0.475961	4.14105	0.538731
M18392	FTD	19.5835	23.9117	6	0.608793	0.198051	1.87138	0.386389
M18394	FTD	19.822	27.5262	10	1.95818	0.833184	4.6022	0.123226
M20699	FTD	19.3547	48.1668	21	3.13732	1.03624	9.49852	0.0430777
M21151	FTD	19.6102	23.9364	9	1.23504	0.755841	2.01806	0.399431
M27728	FTD	19.0125	27.9287	27	0.464351	0.158138	1.36351	0.162775
M31536	FTD	19.686	26.1378	16	1.33609	1.00664	1.77337	0.0448828
M32445	FTD	19.5511	30.061	15	0.689184	0.343986	1.3808	0.29376
M33009	FTD	19.6364	41.3778	11	2.32617	0.828635	6.53008	0.108928
M33173	FTD	19.0219	61.1158	31	1.00589	0.959164	1.05489	0.808873
M33178	FTD	18.0077	40.2123	268	0.923702	0.885204	0.963874	0.000258247
M33384	FTD	19.6761	25.6182	9	0.835926	0.660369	1.05815	0.136221
M33423	FTD	19.0148	39.8137	36	0.979283	0.950783	1.00864	0.164751
M33935	FTD	19.9162	25.7881	10	0.940825	0.4878	1.81458	0.855574
M34109	FTD	19.6339	29.7513	17	0.939789	0.837303	1.05482	0.291848
M34365	FTD	17.412	38.8355	52	0.996762	0.918924	1.08119	0.937684
M34384	FTD	19.6348	30.3977	6	1.11934	0.561065	2.23312	0.749015
M34389	FTD	19.7455	264.864	12	0.937578	0.447646	1.96372	0.864318
M34390	FTD	19.2637	30.8531	10	0.796366	0.33843	1.87395	0.602013
M34395	FTD	19.5485	117.177	15	0.603849	0.29528	1.23488	0.166979
M34400	FTD	19.5001	24.5212	11	0.737344	0.296321	1.83475	0.512399
M34404	FTD	20.7235	29.405	8	0.811329	0.567328	1.16027	0.251993
M35320	FTD	19.6069	26.5549	8	2.42329	0.74081	7.92688	0.143246
M35322	FTD	19.5893	27.4675	14	0.82982	0.54588	1.26145	0.382658
M35527	FTD	19.8509	23.3193	10	2.90723	0.860526	9.82191	0.0857724
M36095	FTD	19.7651	24.8625	3	1.32379	0.639437	2.74057	0.449935
M36097	FTD	19.2183	28.524	23	0.991526	0.935427	1.05099	0.77458
M36098	FTD	20.0031	30.8711	9	0.650934	0.29807	1.42153	0.28132
M36099	FTD	19.5899	28.1585	8	1.40307	0.682509	2.88438	0.357009
M37459	FTD	19.7146	27.2758	8	0.666407	0.212599	2.0889	0.486272
M00053	MS	20.2445	77.8335	8	0.664146	0.161875	2.72488	0.569895
M00054	MS	19.3547	47.4439	191	0.878725	0.526121	1.46764	0.621309
M00059	MS	21.9477	55.6594	5	0.223862	0.0239371	2.09358	0.189456
M00060	MS	17.6352	80.978	198	0.770659	0.458796	1.29451	0.324881
M00063	MS	18.4344	35.9902	40	1.36843	0.71286	2.62688	0.345833
M00064	MS	21.0012	46.475	5	0.553523	0.0634094	4.8319	0.592636
M00513	MS	19.0779	33.3736	22	0.491319	0.177958	1.35647	0.170204
M00527	MS	19.5016	25.8701	12	0.714964	0.305192	1.67493	0.439826
M00542	MS	19.8757	25.8744	10	0.960884	0.800935	1.15278	0.66754
M00575	MS	19.8453	24.9889	5	1.08366	0.68656	1.71043	0.730082
M00577	MS	20.002	23.7779	3	0.594139	0.210662	1.67568	0.325035
M00584	MS	19.4584	334.494	27	1.06751	0.696846	1.63532	0.764036
M00599	MS	20.4114	24.9931	12	1.14209	0.700112	1.86309	0.594647
M00606	MS	19.8607	31.2199	18	0.822156	0.276798	2.442	0.724419
M01105	MS	19.5016	29.7853	18	1.72521	0.83918	3.54674	0.138038
M01107	MS	19.3065	26.535	16	1.06787	0.777542	1.46661	0.685005
M01110	MS	19.7477	27.2642	17	0.697176	0.334887	1.4514	0.334945
M01114	MS	19.6692	29.6661	16	0.960278	0.759522	1.2141	0.734817
M01121	MS	20.3544	59.031	8	0.669208	0.323134	1.38592	0.279547
M01123	MS	19.8261	50.0579	11	0.839142	0.705398	0.998245	0.0477265
M01125	MS	18.7727	28.215	15	1.36212	0.396747	4.67647	0.623389
M01284	MS	19.0029	26.4829	18	0.675733	0.34383	1.32803	0.255534
M01299	MS	18.7727	57.1759	32	3.16972	1.49845	6.70501	0.00254477
M01301	MS	19.7477	70.7386	23	1.76223	0.677975	4.58048	0.245021
M01302	MS	18.5926	30.5661	23	0.964163	0.300163	3.09702	0.951124
M01303	MS	19.6679	37.8589	14	1.13048	0.58886	2.17027	0.712461
M01336	MS	19.7082	39.5743	25	0.574439	0.271744	1.2143	0.146628
M01356	MS	19.9457	32.3388	16	1.07878	0.638571	1.82244	0.776843
M01358	MS	19.7477	87.8667	42	0.983218	0.5629	1.71739	0.952572
M01359	MS	19.3547	32.8621	19	0.615247	0.303645	1.24661	0.177609
M01361	MS	19.8247	29.82	20	0.864119	0.479017	1.55882	0.627552
M01365	MS	19.2196	28.1145	23	0.649421	0.394091	1.07018	0.0902976
M01444	MS	19.7388	31.632	16	0.850561	0.569947	1.26934	0.42813
M01493	MS	19.3547	27.6397	11	1.03563	0.437263	2.45282	0.936573
M01494	MS	19.4348	27.8708	21	0.87082	0.356423	2.1276	0.761525
M01508	MS	18.7725	40.5703	26	0.693483	0.445493	1.07952	0.104998
M01558	MS	18.772	257.702	38	0.820299	0.485978	1.38461	0.458319
M01561	MS	19.3547	27.2458	11	1.42287	0.787334	2.5714	0.242784
M01564	MS	18.7727	53.4842	42	0.754413	0.436672	1.30336	0.312389
M01572	MS	19.5583	27.1193	16	0.910342	0.436171	1.89999	0.802416
M01573	MS	19.6621	24.2788	11	0.989386	0.731598	1.33801	0.944762
M01585	MS	19.257	29.0321	17	0.90145	0.247029	3.28954	0.875177
M01604	MS	18.7727	418.931	24	0.760722	0.389636	1.48523	0.423035
M01605	MS	19.6587	24.6468	10	0.849918	0.657871	1.09803	0.213367
M01638	MS	19.2781	26.9026	22	0.774292	0.430865	1.39145	0.392354
M01640	MS	19.7182	26.0999	13	1.06764	0.943181	1.20853	0.300675
M01642	MS	19.3547	31.632	28	1.50273	0.878644	2.57011	0.136892
M01644	MS	19.0779	32.7349	33	1.07563	0.59996	1.92844	0.80663
M01645	MS	19.2571	30.8558	38	1.27802	0.735491	2.22075	0.384196
M01649	MS	21.0012	45.5501	5	5.31425	0.610999	46.2215	0.130137
M01670	MS	19.5583	24.6243	10	1.28461	0.471318	3.50129	0.624437
M01712	MS	19.0361	28.714	13	1.84188	1.08447	3.12829	0.0238214
M01769	MS	18.7725	33.904	35	1.27858	0.687123	2.37915	0.437965
M01898	MS	19.2571	261.78	38	0.905501	0.586614	1.39774	0.65403
M02132	MS	18.7727	42.6216	47	0.994144	0.558792	1.76868	0.984059
M02137	MS	19.7737	760.709	33	1.01697	0.845747	1.22286	0.858018
M02342	MS	19.3	26.0898	16	0.81404	0.526112	1.25954	0.355568
M02730	MS	19.4347	77.6795	20	0.621834	0.3195	1.21026	0.162026
M02734	MS	19.2569	33.3732	45	0.990491	0.587883	1.66882	0.971366
M03127	MS	19.3378	28.4335	22	1.12588	0.65046	1.94879	0.671885
M03141	MS	19.1792	79.9229	28	1.09054	0.668961	1.7778	0.728135
M03147	MS	19.945	25.9068	3	0.370448	0.111155	1.2346	0.105915
M11438	MS	20.227	26.5549	5	0.42108	0.114044	1.55474	0.194358
M12017	MS	19.0934	29.8179	13	1.25714	0.684514	2.30879	0.460617
M12035	MS	18.7727	30.8558	36	0.819998	0.46821	1.4361	0.487621
M12067	MS	18.7725	30.9327	25	0.802195	0.330385	1.94778	0.626283
M12129	MS	19.0946	28.8325	23	1.13186	0.724056	1.76935	0.586851
M12261	MS	19.5544	25.5906	10	1.19579	0.970522	1.47334	0.0931525
M12593	MS	19.8826	30.566	20	1.71579	0.63924	4.60537	0.283859
M12626	MS	19.5582	24.6101	8	0.860474	0.300686	2.46242	0.779381
M12768	MS	19.4197	23.0334	18	0.847728	0.488807	1.4702	0.556498
M12774	MS	19.2571	72.2304	29	0.741919	0.417668	1.3179	0.308527
M15122	MS	19.0949	27.9312	16	0.488204	0.254856	0.935204	0.0306219
M15140	MS	18.7727	36.6994	31	1.66123	0.91366	3.02048	0.096124
M15335	MS	20.1002	23.3208	12	1.13814	0.945124	1.37057	0.172345
M15365	MS	19.1998	23.8637	14	0.773113	0.369466	1.61775	0.494563
M15488	MS	18.9429	33.2228	19	1.14052	0.404029	3.21955	0.803877
M15500	MS	19.2571	293.186	216	1.04287	0.665193	1.63497	0.854831
M15506	MS	19.1354	29.152	22	1.7535	0.562071	5.47043	0.333304
M15630	MS	19.3137	1859.25	28	0.943702	0.828129	1.0754	0.384665
M15650	MS	19.2196	30.6662	8	0.141683	0.0199125	1.00812	0.0509516
M15676	MS	19.2571	67.8016	33	0.893786	0.493981	1.61717	0.710523
M15677	MS	19.5897	25.0523	10	0.916874	0.701148	1.19897	0.526017
M15749	MS	19.5821	45.3222	17	0.857422	0.62558	1.17519	0.338893
M15958	MS	20.3566	22.5021	8	0.802217	0.525163	1.22543	0.307968
M15990	MS	19.1038	23.5849	15	1.12433	0.847449	1.49168	0.416539
M15996	MS	19.8517	24.1891	5	0.854781	0.426654	1.71251	0.658069
M16634	MS	19.7651	21.9235	8	1.24497	0.798394	1.94133	0.333717
M16816	MS	19.4147	23.9298	12	1.477	0.799497	2.72862	0.212984
M16818	MS	19.5014	24.9929	11	1.08948	0.639005	1.85752	0.7529
M16821	MS	19.0945	28.4337	22	0.89463	0.563913	1.4193	0.63631
M16822	MS	19.0038	47.6817	18	1.34796	0.701232	2.59114	0.37051
M16823	MS	19.5192	23.7275	12	0.861472	0.738081	1.00549	0.0586891
M17805	MS	19.5311	23.2601	10	2.05023	1.14323	3.67681	0.0159905
M17807	MS	19.531	45.1143	21	0.755687	0.565936	1.00906	0.0575874
M17945	MS	19.0779	27.2641	31	1.41442	0.732232	2.73219	0.30199
M18283	MS	19.9986	27.0591	9	0.836344	0.558128	1.25324	0.386461
M18349	MS	19.4196	50.0281	17	1.30023	0.752014	2.24809	0.34733
M18357	MS	19.7133	25.2431	7	1.05851	0.751398	1.49115	0.745006
M18369	MS	19.4128	27.4009	31	1.10693	0.572385	2.1407	0.762721
M18467	MS	19.7477	24.7163	10	1.28454	0.762151	2.16498	0.347133
M18474	MS	19.4008	32.3748	11	1.088	0.966922	1.22424	0.16117
M18476	MS	20.051	23.5075	6	0.824851	0.591333	1.15059	0.256826
M18477	MS	20.463	24.2665	7	0.979827	0.825872	1.16248	0.815237
M18494	MS	19.4677	25.1297	10	0.89071	0.675453	1.17457	0.412222
M18497	MS	19.7988	25.8785	14	0.947403	0.819162	1.09572	0.466543
M18929	MS	19.2196	28.8143	13	0.877641	0.471557	1.63343	0.680485
M19323	MS	19.9362	29.2792	7	0.994821	0.552652	1.79076	0.986188
M19324	MS	19.8201	27.3847	6	1.47347	0.867363	2.50313	0.151669
M19362	MS	19.8712	28.1095	23	0.76094	0.373734	1.54931	0.451388
M19364	MS	18.9792	30.2385	18	1.36021	0.865463	2.13779	0.182334
M19368	MS	19.5578	26.1593	9	3.73394	1.68685	8.26526	0.00115539
M19396	MS	19.5102	32.1237	8	0.608358	0.347557	1.06486	0.0818673
M19414	MS	19.7449	25.2174	13	1.36159	0.792731	2.33867	0.26341
M19415	MS	20.3627	22.9241	5	0.881814	0.39377	1.97475	0.759783
M19934	MS	18.7727	50.8456	38	0.935495	0.559766	1.56342	0.799126
M20489	MS	18.9429	33.9042	33	0.562354	0.264865	1.19397	0.134016
M20675	MS	19.0949	190.797	30	0.925991	0.613575	1.39748	0.714238
M21044	MS	19.6069	29.1521	16	0.920044	0.548848	1.54229	0.751878
M21047	MS	19.2782	33.7412	17	0.780288	0.34726	1.7533	0.548098
M21049	MS	19.5927	30.9313	15	1.10686	0.909804	1.3466	0.310111
M21127	MS	20.0779	26.116	13	1.28889	0.680238	2.44213	0.436398
M21184	MS	20.0145	36.8131	14	1.29998	0.931417	1.81438	0.123003
M21188	MS	19.4193	30.0375	26	1.20802	0.740895	1.96967	0.448659
M21630	MS	19.8999	401.067	22	0.802129	0.531995	1.20943	0.292626
M22030	MS	20.0639	76.218	16	1.20509	0.661869	2.19416	0.541746
M22032	MS	19.0864	23.3529	16	0.927034	0.578922	1.48447	0.752459
M22116	MS	19.8999	41.0652	14	1.35789	0.634627	2.90546	0.430522
M22130	MS	19.6054	24.4538	16	1.19079	0.670393	2.11513	0.551372
M22138	MS	19.9952	69.4093	7	1.47167	0.847781	2.55469	0.16971
M22175	MS	19.7754	82.7668	7	1.27648	0.842262	1.93456	0.249844
M22177	MS	18.4843	42.2371	54	0.948152	0.611762	1.46951	0.811767
M22189	MS	19.1997	40.1001	10	1.33321	0.755462	2.3528	0.321029
M22481	MS	19.0779	146.639	34	0.981598	0.624973	1.54172	0.935734
M22548	MS	19.2195	28.5734	13	1.5017	0.733115	3.07605	0.266405
M22649	MS	19.5576	25.7383	11	0.383006	0.156335	0.938328	0.0357991
M22842	MS	19.7977	22.2298	10	0.977152	0.81472	1.17197	0.80322
M24074	MS	19.8203	27.1587	19	1.13935	0.620837	2.09092	0.67365
M25459	MS	19.0779	32.3014	30	0.814287	0.573754	1.15566	0.250105
M25599	MS	19.2912	28.2742	19	1.062	0.673366	1.67493	0.795819
M27256	MS	18.7726	24.9932	33	1.10404	0.532785	2.2878	0.790049
M27273	MS	19.9699	25.5677	11	0.811338	0.361624	1.82031	0.61209
M27278	MS	19.5142	159.437	21	0.903556	0.545437	1.49681	0.693726
M27447	MS	19.573	44.5292	15	1.09234	0.825933	1.44468	0.535777
M27513	MS	19.2918	30.7435	20	0.817848	0.526147	1.27127	0.371604
M27531	MS	20.1829	28.6774	15	0.878027	0.715405	1.07761	0.213244
M27672	MS	20.2886	24.9716	5	0.607371	0.363056	1.01609	0.0575449
M27710	MS	19.4343	254.803	22	0.905176	0.73275	1.11818	0.355486
M27716	MS	19.5337	686.389	20	1.07183	0.934842	1.22889	0.320107
M27718	MS	19.7721	105.034	12	0.827329	0.554854	1.23361	0.35239
M27722	MS	19.54	23.185	7	1.00628	0.47096	2.15008	0.987105
M27738	MS	19.477	24.9932	17	1.28977	0.867942	1.9166	0.20798
M30805	MS	19.6065	28.3093	12	1.00686	0.673667	1.50484	0.973418
M31453	MS	19.5629	24.9931	19	1.72002	0.955413	3.09654	0.0706196
M31522	MS	19.7523	22.5479	4	0.817315	0.552094	1.20995	0.31353
M31548	MS	19.8819	21.989	12	1.09055	0.80744	1.47292	0.57192
M31555	MS	19.5752	23.7591	13	0.975836	0.659002	1.445	0.902798
M31591	MS	19.4242	508.646	28	0.856105	0.749488	0.977887	0.0220511
M31787	MS	19.8982	26.7096	12	0.937744	0.775628	1.13375	0.506851
M32197	MS	19.6988	51.7152	19	1.12423	0.65431	1.93165	0.671552
M32198	MS	19.0949	99.26	21	1.17311	0.682344	2.01684	0.563621
M32315	MS	18.7727	86.3116	32	1.00371	0.549726	1.83261	0.990382
M32319	MS	20.1672	21.7531	4	0.634853	0.342879	1.17545	0.148279
M32322	MS	20.1162	28.8444	4	0.912725	0.342031	2.43565	0.855306
M32328	MS	19.7052	453.695	24	1.38849	1.03503	1.86266	0.02855
M32338	MS	19.0044	686.615	33	0.987045	0.732201	1.33059	0.931804
M32339	MS	19.2571	59.3645	39	1.62019	0.905231	2.89983	0.104221
M32346	MS	19.5249	34.9217	14	0.924676	0.761727	1.12248	0.428494
M32348	MS	18.7727	42.2385	38	1.25025	0.694098	2.25203	0.456964
M32379	MS	19.6058	87.8619	13	1.12439	0.788216	1.60394	0.517709
M32388	MS	19.7354	31.6283	5	1.19732	0.717627	1.99767	0.49049
M32393	MS	19.686	33.5342	15	0.598745	0.286968	1.24925	0.171659
M32405	MS	19.3085	86.7603	16	1.21645	0.871598	1.69775	0.249327
M32412	MS	19.5441	1912.98	54	1.0442	0.93548	1.16557	0.440672
M32418	MS	19.1354	63.9826	14	1.23966	0.809751	1.89781	0.32279
M32425	MS	19.3547	56.2347	22	0.820252	0.61639	1.09154	0.174097
M32452	MS	19.5404	147.537	35	1.15626	0.702888	1.90207	0.567515
M32489	MS	19.2571	28.0431	33	1.8189	0.975435	3.39173	0.0598726
M32492	MS	18.7727	29.0322	48	1.20866	0.805431	1.81377	0.360128
M32497	MS	19.2498	273.749	29	0.959532	0.748147	1.23064	0.74491
M32504	MS	19.3289	23.7104	8	1.61526	0.934868	2.79084	0.0856922
M32518	MS	19.4144	35.9902	37	0.624135	0.315563	1.23444	0.175519
M32549	MS	19.5283	56.1318	11	1.0859	0.803504	1.46755	0.591758
M32553	MS	19.6937	26.4211	13	1.1335	0.837467	1.53417	0.417129
M32557	MS	19.7596	23.6922	11	1.19176	0.8161	1.74035	0.363837
M32560	MS	19.5981	24.7546	13	0.951954	0.79693	1.13713	0.587179
M32564	MS	19.5013	50.9387	18	0.904461	0.741337	1.10348	0.322381
M32578	MS	19.5507	104.209	18	1.02543	0.777928	1.35168	0.858569
M32586	MS	19.7817	426.106	19	0.971223	0.815776	1.15629	0.742821
M32587	MS	19.8376	66.1625	13	0.882112	0.539708	1.44175	0.616783
M32593	MS	19.5516	24.788	12	0.751181	0.463558	1.21726	0.245363
M32616	MS	19.5084	23.5377	12	1.07718	0.864117	1.34276	0.508523
M32632	MS	19.2571	50.7474	25	0.778633	0.528344	1.14749	0.206004
M32634	MS	19.2571	44.4286	36	0.844653	0.490107	1.45568	0.543232
M32635	MS	19.6069	37.4326	12	0.889376	0.498813	1.58575	0.69112
M32644	MS	19.5403	30.8557	34	1.14979	0.643752	2.0536	0.637176
M32651	MS	19.492	31.1616	22	1.2007	0.725564	1.98699	0.47665
M32654	MS	19.0044	108.964	28	0.791784	0.494728	1.26721	0.330551
M32672	MS	19.2919	107.9	19	0.823468	0.607979	1.11533	0.209552
M32675	MS	19.4584	30.8784	21	1.27604	0.523205	3.11214	0.592036
M32691	MS	19.4822	29.7435	18	0.970205	0.779721	1.20722	0.78621
M32698	MS	19.5016	82.368	17	1.42259	0.721322	2.80562	0.309048
M32709	MS	19.42	117.117	31	1.23388	0.847271	1.79689	0.273163
M32729	MS	19.0772	35.3603	42	0.848672	0.513566	1.40244	0.522007
M32735	MS	19.5888	54.5914	18	0.795548	0.628957	1.00627	0.0564085
M32739	MS	19.8987	24.0021	9	1.21736	0.586053	2.52871	0.597966
M32740	MS	19.2571	72.2303	50	1.33972	0.790517	2.27047	0.277215
M32753	MS	19.5535	64.2495	13	1.42445	1.06335	1.90819	0.0177057
M32754	MS	19.5008	28.8353	13	0.899515	0.760837	1.06347	0.215111
M32755	MS	19.7242	27.7088	21	1.1739	0.847618	1.62578	0.334566
M32757	MS	19.531	653.261	23	0.959272	0.805872	1.14187	0.640001
M32758	MS	19.5305	516.459	22	0.95141	0.776292	1.16603	0.631273
M32759	MS	19.6064	537.685	22	0.994727	0.812514	1.2178	0.959153
M32761	MS	19.6447	92.4738	21	1.09563	0.778315	1.54232	0.600639
M32762	MS	19.5826	38.8886	13	1.23706	0.991216	1.54388	0.0598479
M32769	MS	19.6629	29.8865	7	1.0117	0.69381	1.47525	0.951793
M32786	MS	19.6216	57.7889	16	0.985791	0.760444	1.27792	0.913938
M32787	MS	19.6297	77.4174	13	0.713647	0.443093	1.1494	0.165333
M32795	MS	19.9573	114.481	15	1.18286	0.87845	1.59277	0.268611
M32800	MS	19.6744	34.2312	10	0.972851	0.820576	1.15338	0.751309
M32802	MS	19.6367	29.5799	7	1.18411	0.81192	1.72692	0.38007
M32808	MS	20.2435	137.94	17	1.17977	0.947718	1.46865	0.139025
M32814	MS	19.2194	26.9816	13	1.28262	0.613719	2.68055	0.508089
M32836	MS	21.6682	49.5654	7	1.11255	0.787053	1.57267	0.545861
M32838	MS	19.7732	30.8226	11	0.905718	0.583438	1.40602	0.658979
M32846	MS	19.5573	1431.87	27	0.982905	0.890562	1.08482	0.731944
M32847	MS	19.3286	643.129	21	0.959795	0.777382	1.18501	0.702785
M32854	MS	19.4564	25.7169	6	0.969699	0.751981	1.25045	0.812524
M32855	MS	19.4763	400.619	20	0.958845	0.772655	1.1899	0.702813
M32857	MS	19.7908	23.9777	7	1.03745	0.698897	1.54	0.855251
M32863	MS	19.6839	24.8833	11	0.940595	0.779194	1.13543	0.523724
M32867	MS	18.5511	47.0076	21	0.800059	0.263662	2.42771	0.693673
M32869	MS	19.4363	25.1381	17	1.31947	0.920972	1.89041	0.130737
M32910	MS	18.7727	817.065	57	0.918203	0.642628	1.31195	0.639284
M32980	MS	19.8814	24.6173	9	0.978224	0.527758	1.81318	0.944252
M33084	MS	19.5385	50.3824	9	1.58313	1.10262	2.27304	0.0127991
M33131	MS	19.346	55.1091	12	0.814937	0.565769	1.17384	0.271715
M33132	MS	18.7727	550.719	38	0.404311	0.242955	0.672831	0.000492335
M33137	MS	19.8515	93.7284	12	1.0746	0.891377	1.29548	0.450641
M33138	MS	19.6994	516.586	25	0.978719	0.767844	1.24751	0.86207
M33140	MS	19.3547	24.1998	8	1.02301	0.479159	2.18416	0.953113
M33144	MS	19.5527	172.397	9	0.986407	0.805032	1.20865	0.894973
M33150	MS	19.5981	25.7677	10	0.945813	0.819656	1.09139	0.44563
M33163	MS	19.7179	28.8432	20	0.524535	0.326911	0.841628	0.00748025
M33165	MS	19.4023	23.4679	10	1.07699	0.651825	1.77947	0.772207
M33188	MS	20.0171	28.5791	3	0.985795	0.802817	1.21048	0.891374
M33190	MS	19.6437	25.1716	21	1.04293	0.918374	1.18437	0.517157
M33192	MS	19.5068	24.8883	13	0.989935	0.81952	1.19579	0.916416
M33194	MS	19.6387	23.8391	13	1.03073	0.880498	1.20659	0.706504
M33195	MS	20.3009	23.9459	5	0.886948	0.66494	1.18308	0.414396
M33197	MS	20.4653	24.8658	8	0.910311	0.762458	1.08683	0.298736
M33203	MS	19.5661	33.495	16	1.00184	0.893453	1.12338	0.974852
M33204	MS	19.4745	21.9031	12	0.945766	0.498273	1.79515	0.864588
M33221	MS	19.5692	22.6779	17	0.950744	0.685794	1.31806	0.761848
M33228	MS	18.8722	33.6305	16	1.20833	0.65472	2.23005	0.545001
M33230	MS	18.9795	40.5925	15	2.00035	1.10429	3.62349	0.0221825
M33250	MS	19.703	210.409	17	0.810116	0.644733	1.01792	0.0706861
M33353	MS	19.5044	27.4635	20	1.02142	0.906155	1.15135	0.728628
M33359	MS	19.5662	30.9297	8	1.15932	0.958959	1.40154	0.126744
M33363	MS	19.9118	28.8544	7	1.24056	0.739144	2.08211	0.414558
M33364	MS	19.777	23.6183	8	1.72698	0.879503	3.39106	0.11251
M33380	MS	19.0948	28.6459	36	1.04982	0.63511	1.73533	0.849613
M33389	MS	18.6209	45.3726	56	1.27955	0.77754	2.10567	0.332086
M33390	MS	19.5513	28.1381	14	0.989908	0.787795	1.24387	0.930629
M33391	MS	19.5061	31.0895	15	0.963521	0.897061	1.0349	0.308163
M33408	MS	19.6022	26.9057	12	1.23168	0.974876	1.55614	0.080693
M33415	MS	19.8054	499.082	22	0.87307	0.750129	1.01616	0.07961
M33420	MS	19.5174	24.51	11	1.10258	0.818782	1.48473	0.520135
M33422	MS	18.7726	34.0185	34	1.00107	0.493175	2.03203	0.997629
M33441	MS	20.7593	217.503	13	1.16723	0.848306	1.60607	0.342288
M33442	MS	19.2571	27.2642	26	0.744059	0.289104	1.91497	0.539916
M33443	MS	19.6913	22.3592	8	1.14278	0.562386	2.32214	0.712184
M33447	MS	19.3547	58.4428	12	0.942195	0.581399	1.52689	0.808987
M33453	MS	19.4569	30.1237	16	1.03878	0.679035	1.58911	0.860765
M33477	MS	19.7477	54.5807	44	1.04607	0.597245	1.8322	0.874834
M33488	MS	19.4839	29.0758	16	0.908124	0.689923	1.19534	0.491848
M33507	MS	19.4174	2912.88	37	0.893973	0.810656	0.985852	0.024741
M33508	MS	19.9316	226.604	18	1.04975	0.885216	1.24486	0.576722
M33509	MS	19.3545	33.9626	9	1.21091	0.697715	2.10158	0.496288
M33510	MS	19.6718	48.4497	23	1.24865	0.818185	1.9056	0.303204
M33515	MS	19.7285	44.4319	43	1.23097	0.70689	2.1436	0.462784
M33531	MS	19.2332	22.777	9	0.868907	0.625878	1.20631	0.401211
M33587	MS	19.545	27.3877	15	1.01732	0.650072	1.59204	0.940096
M33609	MS	19.4797	30.3443	18	1.02079	0.928231	1.12258	0.671331
M33610	MS	19.3091	27.1181	26	1.07676	1.00066	1.15865	0.0479683
M33627	MS	19.9076	23.0701	10	0.766233	0.419877	1.3983	0.385618
M33633	MS	19.8479	25.718	7	1.12986	0.834717	1.52936	0.429294
M33637	MS	19.4854	22.2098	7	1.04133	0.742188	1.46105	0.814668
M33638	MS	19.7304	23.4775	9	1.5618	0.907248	2.68861	0.107675
M33652	MS	19.5842	27.977	7	0.957056	0.676042	1.35488	0.804527
M33653	MS	19.7243	26.5822	14	1.07957	0.777534	1.49894	0.647488
M33658	MS	19.7551	27.3122	8	0.968397	0.727626	1.28884	0.825727
M33666	MS	19.1345	99.1368	27	0.932163	0.592116	1.4675	0.761589
M33675	MS	19.5238	25.4853	7	0.963441	0.6597	1.40703	0.847159
M33683	MS	19.5377	27.2081	12	1.05488	0.924207	1.20404	0.428452
M33751	MS	19.2244	28.3299	26	1.00838	0.959192	1.0601	0.743509
M33782	MS	19.9165	25.9066	12	1.12407	0.956804	1.32058	0.154794
M33801	MS	19.6468	84.5442	8	0.580216	0.406783	0.827593	0.00266128
M33821	MS	19.3547	32.2136	16	1.19768	0.775047	1.85078	0.416586
M33822	MS	20.2445	22.1267	6	0.875644	0.434461	1.76483	0.710363
M33833	MS	19.5892	24.856	7	0.865089	0.560613	1.33493	0.512611
M33835	MS	19.8904	27.607	8	1.03862	0.84407	1.278	0.720311
M33864	MS	20.1139	22.8623	5	0.946481	0.653613	1.37058	0.770913
M33871	MS	19.5685	23.2593	12	0.907409	0.590969	1.39329	0.656986
M33877	MS	19.3462	32.6479	24	1.00856	0.949328	1.07149	0.782548
M33883	MS	19.4258	100.458	15	0.974281	0.839907	1.13015	0.730768
M33884	MS	19.502	110.989	13	1.16659	0.826705	1.64621	0.380541
M33885	MS	19.6254	25.3997	10	0.960192	0.752062	1.22592	0.744512
M33892	MS	19.4336	30.0506	31	0.750628	0.535385	1.05241	0.0961713
M33901	MS	19.6254	192.55	23	1.04463	0.818165	1.33379	0.726155
M33910	MS	19.7169	25.1836	13	1.28632	0.828058	1.9982	0.26254
M33936	MS	19.8552	347.728	22	1.32972	1.01787	1.73712	0.0366288
M33937	MS	20.4738	129.039	15	1.1827	0.792765	1.76444	0.410988
M33939	MS	19.3078	24.4077	11	1.0676	0.508637	2.24084	0.86271
M33941	MS	19.4491	188.508	18	1.31637	0.972544	1.78174	0.0751228
M33955	MS	19.42	30.2418	29	2.50507	1.21505	5.1647	0.0128607
M33957	MS	19.6716	24.4892	6	1.08282	0.552447	2.12238	0.816738
M33960	MS	19.6955	25.8701	17	0.817844	0.449368	1.48847	0.510447
M33961	MS	19.8111	22.7223	9	1.36409	0.676004	2.75255	0.386044
M33968	MS	19.7275	39.4994	18	1.13267	0.815327	1.57353	0.457642
M33969	MS	19.5535	24.167	8	1.16237	0.629695	2.14565	0.630451
M33971	MS	19.7687	22.6143	6	1.01311	0.471945	2.17481	0.973341
M33972	MS	19.7187	30.5042	7	1.21313	0.621878	2.36652	0.570923
M33973	MS	19.6069	339.941	16	0.860765	0.714169	1.03745	0.115492
M34035	MS	19.5187	22.5012	4	4.89887	1.76729	13.5795	0.00225322
M34040	MS	19.855	726.344	18	0.900201	0.713191	1.13625	0.376212
M34062	MS	19.7477	37.9094	25	1.87751	0.773242	4.5588	0.163985
M34106	MS	19.6291	252.147	20	0.88452	0.704601	1.11038	0.290249
M34112	MS	20.0067	24.2945	16	1.02762	0.803279	1.31461	0.828366
M34123	MS	19.2917	87.3258	20	0.90002	0.542529	1.49307	0.683362
M34214	MS	19.7187	134.933	18	0.854486	0.531202	1.37452	0.516736
M34221	MS	19.5989	58.761	12	1.31975	0.881959	1.97485	0.177289
M34244	MS	19.42	37.0258	23	1.31109	0.851656	2.01836	0.218514
M34245	MS	19.5124	26.0881	17	1.09503	0.781062	1.53521	0.598467
M34283	MS	19.1354	35.3268	42	0.787525	0.467497	1.32663	0.369339
M34289	MS	19.3804	26.1219	15	0.786111	0.53837	1.14786	0.212762
M34306	MS	19.0947	126.094	21	0.955787	0.760313	1.20152	0.698492
M34314	MS	19.8436	35.0013	9	0.935802	0.729959	1.19969	0.600625
M34322	MS	19.0642	48.0969	30	1.05964	0.996751	1.12649	0.063497
M34327	MS	19.768	24.969	9	1.13411	0.932507	1.37929	0.207592
M34329	MS	19.3702	22.4293	10	1.19348	0.964708	1.47649	0.103305
M34336	MS	19.6467	28.4332	23	1.00588	0.803466	1.2593	0.959193
M34338	MS	19.4265	35.9015	32	1.02445	0.990363	1.05971	0.16179
M34339	MS	19.4634	26.9952	20	0.956332	0.835224	1.095	0.518082
M34344	MS	19.6122	28.2084	10	1.01318	0.84877	1.20944	0.884731
M34350	MS	19.3992	32.4714	13	1.32221	1.10769	1.57828	0.00198637
M34359	MS	18.7722	50.5981	42	1.10557	0.660942	1.84931	0.702192
M34407	MS	20.0608	179.71	26	1.78225	1.2623	2.51637	0.0010252
M34409	MS	19.4579	42.0408	6	0.691173	0.307365	1.55424	0.37166
M34416	MS	19.5013	46.4166	14	1.08519	0.701388	1.679	0.713522
M34419	MS	19.4958	24.9932	13	0.495901	0.246917	0.995953	0.0486824
M34420	MS	19.6923	211.802	20	1.13936	1.00422	1.29269	0.0428405
M34441	MS	19.4313	26.4584	16	1.27813	0.9626	1.6971	0.0897992
M34453	MS	18.5511	25.1165	3	0.592926	0.045968	7.64795	0.688697
M34456	MS	19.2898	25.8672	24	0.60719	0.390989	0.942941	0.0263122
M34469	MS	20.0298	28.7202	11	0.908628	0.594993	1.38759	0.657353
M34481	MS	19.8189	1169.83	24	1.03362	0.839877	1.27207	0.754831
M34499	MS	19.4896	24.3801	7	1.01146	0.719802	1.4213	0.947652
M34513	MS	19.4763	23.3467	13	1.17951	0.900293	1.54533	0.230962
M34516	MS	19.557	29.2266	18	1.01101	0.950195	1.07572	0.729395
M34527	MS	19.3244	73.7376	13	0.829519	0.490707	1.40227	0.485314
M34530	MS	19.458	23.5884	9	1.02737	0.737842	1.4305	0.872989
M34533	MS	19.3929	67.126	17	0.923043	0.711906	1.1968	0.545646
M34534	MS	19.3521	37.7194	14	1.08452	0.744023	1.58084	0.673011
M34535	MS	19.8505	28.0572	8	0.989656	0.925392	1.05838	0.761478
M34539	MS	19.4171	36.5451	19	0.881618	0.601868	1.2914	0.517673
M34674	MS	19.4166	26.5362	11	0.723222	0.478471	1.09317	0.124213
M34732	MS	21.6035	22.0313	2	0.75797	0.152213	3.77445	0.735122
M34761	MS	20.094	32.2122	17	0.722862	0.487661	1.0715	0.10608
M34878	MS	19.404	23.6206	9	1.20803	0.865248	1.68661	0.26703
M34912	MS	19.5391	33.5066	42	0.506082	0.296465	0.863909	0.0125562
M35114	MS	19.1861	22.9114	9	0.67731	0.381032	1.20396	0.184334
M35126	MS	19.6357	30.0934	17	0.957471	0.713289	1.28525	0.772336
M35127	MS	18.8839	30.0222	19	1.1367	0.665983	1.94014	0.638538
M35137	MS	19.4424	35.9853	55	0.768014	0.487613	1.20966	0.254798
M35159	MS	20.5768	49.351	9	1.11169	0.796501	1.5516	0.533665
M35160	MS	19.8375	43.9259	11	1.24298	0.69633	2.21877	0.461897
M35186	MS	19.42	74.7513	25	1.28784	0.796672	2.08182	0.301921
M35187	MS	19.707	303.716	12	0.995652	0.832859	1.19027	0.96185
M35189	MS	19.7238	602.909	22	0.82124	0.670251	1.00624	0.057443
M35193	MS	18.9789	163.425	25	0.941461	0.64549	1.37314	0.754085
M35240	MS	19.4082	57.3719	8	0.732162	0.331989	1.6147	0.439776
M35253	MS	20.0781	26.5548	19	0.734797	0.452263	1.19383	0.213323
M35254	MS	19.6067	26.5546	13	0.454791	0.216795	0.954056	0.037125
M35255	MS	19.5086	27.1294	9	0.96267	0.543344	1.70561	0.896277
M35257	MS	19.3132	24.1796	18	0.527058	0.296782	0.936008	0.0288412
M35270	MS	19.0948	33.3735	35	0.766518	0.387013	1.51816	0.445711
M35305	MS	19.1585	23.7669	10	0.960612	0.631754	1.46066	0.850922
M35326	MS	19.2557	40.8037	42	1.6186	0.937599	2.79423	0.0838684
M35327	MS	19.6857	24.9928	19	1.69191	0.653335	4.38146	0.278733
M35331	MS	19.476	25.9685	8	0.654914	0.326552	1.31346	0.233246
M35397	MS	19.9807	28.6462	27	0.765156	0.337632	1.73403	0.521351
M35431	MS	19.1647	30.2414	23	0.912411	0.50283	1.65562	0.763015
M35433	MS	19.7667	68.8192	9	1.4676	0.896796	2.40172	0.126879
M35439	MS	18.8838	191.821	42	0.96248	0.696482	1.33007	0.81676
M35451	MS	19.4151	32.0137	18	1.01883	0.968585	1.07168	0.469686
M35464	MS	19.0041	50.6797	14	2.02973	1.00279	4.10837	0.0491031
M35472	MS	19.7241	37.4314	18	1.26858	0.943943	1.70487	0.114693
M35551	MS	19.5212	31.7021	12	1.12917	0.87119	1.46354	0.358636
M35626	MS	19.4023	27.8474	5	1.38081	0.775952	2.45716	0.272502
M35628	MS	19.6411	36.5375	8	1.19929	0.608632	2.36315	0.599495
M35631	MS	18.7726	76.2845	26	1.03821	0.676972	1.59219	0.863555
M35635	MS	19.8381	23.4965	9	1.01423	0.855157	1.20289	0.871039
M35669	MS	19.758	264.231	22	0.929062	0.748018	1.15392	0.505826
M35675	MS	18.621	34.0185	46	0.965173	0.591768	1.5742	0.887062
M35678	MS	19.747	229.015	28	1.02808	0.819219	1.29019	0.811094
M35718	MS	19.2196	43.7514	23	1.04879	0.620772	1.77193	0.858688
M35754	MS	19.1726	38.559	42	1.24379	0.804558	1.9228	0.32632
M35854	MS	19.402	28.6287	12	1.32686	0.84216	2.09054	0.222717
M35977	MS	19.54	26.7381	7	0.642252	0.298067	1.38388	0.258278
M35978	MS	19.6284	25.2713	16	1.04877	0.731354	1.50395	0.795702
M36009	MS	19.6396	41.8513	12	0.867481	0.614514	1.22458	0.418986
M36103	MS	19.6173	29.2146	15	0.894295	0.692245	1.15532	0.392542
M36115	MS	20.1589	93.6977	12	1.17635	0.938527	1.47444	0.158714
M36131	MS	19.6438	58.7117	18	1.07306	0.830042	1.38723	0.590438
M36134	MS	19.5019	91.3662	14	0.983335	0.785855	1.23044	0.883186
M36230	MS	19.7761	70.4479	19	1.00234	0.792452	1.26781	0.984476
M36300	MS	19.9699	23.8319	9	0.815697	0.458935	1.4498	0.487546
M36376	MS	20.3556	26.6595	5	1.05329	0.704362	1.57507	0.800355
M36399	MS	19.768	47.6179	12	0.887587	0.626003	1.25848	0.503239
M36468	MS	20.2872	23.8257	16	1.05918	0.851551	1.31743	0.605544
M36515	MS	19.2405	27.0326	9	0.122327	0.0120879	1.23792	0.0752033
M36552	MS	19.8711	26.2582	15	0.504709	0.195918	1.30019	0.156704
M36553	MS	19.1724	198.897	23	1.00364	0.708625	1.42147	0.983693
M36559	MS	19.5397	24.955	16	0.883997	0.691504	1.13007	0.325095
M36585	MS	19.5063	24.8361	11	1.17369	0.839388	1.64114	0.349098
M36589	MS	19.3347	34.9528	18	1.12286	0.917489	1.37421	0.260846
M36673	MS	19.3064	27.2613	14	1.6167	0.964025	2.71126	0.0685955
M36738	MS	20.1446	26.7475	10	0.857842	0.647171	1.13709	0.286229
M36754	MS	19.6954	87.0858	10	0.94467	0.587928	1.51787	0.814019
M36756	MS	19.6289	25.7905	12	0.921831	0.617529	1.37609	0.690495
M36776	MS	19.7477	24.9932	14	1.02048	0.446418	2.33273	0.961674
M36802	MS	19.8338	23.3503	9	1.17903	0.583196	2.38362	0.646549
M36808	MS	19.2568	29.2678	34	0.571068	0.29348	1.11121	0.0990471
M36850	MS	20.0989	27.8915	11	1.19551	0.905976	1.57758	0.206916
M37004	MS	19.883	21.1746	9	1.13091	0.704231	1.8161	0.610726
M37058	MS	19.0773	413.318	46	1.39699	0.911069	2.14206	0.125298
M37097	MS	19.4222	125.087	14	1.01262	0.871055	1.1772	0.870297
M37104	MS	19.3235	26.3822	13	0.885918	0.680246	1.15377	0.368807
M37112	MS	19.4592	24.9227	12	1.00336	0.901763	1.11641	0.950835
M37190	MS	19.6431	128.003	19	0.995394	0.830543	1.19297	0.960146
M37202	MS	19.6599	415.857	26	0.924229	0.797552	1.07103	0.294803
M37203	MS	19.4584	77.7391	17	0.99505	0.6931	1.42854	0.978541
M37253	MS	19.4191	24.2023	11	1.16201	0.681105	1.98247	0.581693
M37506	MS	18.7727	30.8558	43	0.640942	0.34929	1.17612	0.150947
M38150	MS	20.9981	25.7115	3	1.17838	0.542188	2.56109	0.678559
M38178	MS	19.1649	285.156	15	1.20299	0.851276	1.70002	0.294916
M38768	MS	19.6047	28.8823	14	1.44555	0.758815	2.7538	0.262448
M00553	MS	19.565	26.9269	14	1.05538	0.971437	1.14658	0.202422
M00569	MS	19.7709	56.0603	11	1.06433	0.90132	1.25682	0.462319
M01515	MS	19.7973	28.452	17	1.02	0.974831	1.06727	0.391454
M15753	MS	19.4666	23.8927	10	0.941644	0.63965	1.38622	0.760555
M15778	MS	19.0779	27.2641	35	1.07351	0.556476	2.07095	0.832421
M17799	MS	18.1068	43.9373	104	0.999181	0.945042	1.05642	0.977006
M18254	MS	19.8493	25.91	12	1.10877	0.870397	1.41242	0.403138
M18281	MS	19.5491	27.6527	10	1.00643	0.928802	1.09055	0.875572
M18335	MS	19.6388	27.0438	6	1.06074	0.776328	1.44935	0.711187
M18392	MS	19.5835	23.9117	6	0.752342	0.481112	1.17648	0.212224
M18394	MS	19.822	27.5262	11	1.12066	0.798702	1.57241	0.509735
M20699	MS	19.2196	48.1668	23	0.750058	0.516434	1.08937	0.130935
M21151	MS	19.6102	23.9364	8	0.993275	0.825136	1.19567	0.943149
M27728	MS	19.0933	27.9287	20	1.02966	0.64021	1.65602	0.904044
M31536	MS	19.686	27.6258	21	0.933027	0.839976	1.03639	0.195932
M32445	MS	19.5511	30.061	15	0.913075	0.693259	1.20259	0.517535
M33009	MS	19.4118	41.3778	14	1.09642	0.756406	1.58929	0.626958
M33173	MS	19.0219	61.1158	40	1.00257	0.984232	1.02125	0.785098
M33178	MS	18.0077	40.2123	436	0.994491	0.979811	1.00939	0.466529
M33384	MS	19.6761	25.6182	10	0.979784	0.89449	1.07321	0.660302
M33423	MS	18.9084	49.6595	51	0.994203	0.983154	1.00538	0.307918
M33935	MS	20.244	25.7881	9	1.04029	0.794896	1.36143	0.773558
M34109	MS	19.6042	29.7513	31	0.978674	0.944455	1.01413	0.235193
M34365	MS	17.4491	38.8355	57	0.991245	0.96182	1.02157	0.567388
M34384	MS	19.6348	30.3977	5	0.801522	0.57866	1.11022	0.183199
M34389	MS	19.7455	264.864	14	0.961664	0.714926	1.29356	0.796088
M34390	MS	19.2637	30.8531	11	1.22187	0.902703	1.65388	0.194538
M34395	MS	19.5485	117.177	17	0.892953	0.681434	1.17013	0.41172
M34400	MS	19.5001	24.5212	9	0.911613	0.626988	1.32544	0.627969
M34404	MS	20.7235	29.405	7	0.957412	0.814611	1.12525	0.597434
M35320	MS	19.6069	26.5549	9	1.27712	0.806346	2.02276	0.29715
M35322	MS	19.5136	27.4675	16	0.930705	0.812143	1.06658	0.301651
M35527	MS	19.7966	23.6434	11	1.50849	0.970518	2.34467	0.0677035
M36095	MS	19.7651	24.8625	4	1.00588	0.793323	1.27538	0.961418
M36097	MS	19.2183	28.524	24	0.991542	0.970387	1.01316	0.440133
M36098	MS	20.0031	30.8711	10	1.22921	0.92013	1.64212	0.162523
M36099	MS	19.5899	28.1585	8	0.902267	0.684677	1.18901	0.465125
M37459	MS	19.7146	27.2758	9	1.07924	0.755912	1.54086	0.674689
M00053	PD	21.77	77.8335	5	0.416444	0.0629523	2.75487	0.363492
M00054	PD	18.9429	47.4439	194	0.962154	0.50248	1.84234	0.907335
M00059	PD	19.7017	26.4594	6	0.899694	0.0905191	8.9423	0.928119
M00060	PD	17.6352	80.978	217	0.749071	0.400525	1.40093	0.365724
M00063	PD	18.4344	39.0486	46	0.895999	0.450264	1.78299	0.754438
M00064	PD	20.032	46.475	6	4.00809	0.300476	53.4645	0.293575
M00513	PD	19.0779	28.4367	26	1.28084	0.418469	3.92034	0.664538
M00527	PD	19.5016	23.942	11	0.65352	0.227938	1.8737	0.428626
M00542	PD	19.8757	25.8744	8	1.08949	0.875733	1.35543	0.441788
M00575	PD	19.8453	24.9889	6	2.21232	1.13153	4.32546	0.0202769
M00577	PD	19.4919	23.7779	4	1.74405	0.511429	5.94747	0.374193
M00584	PD	19.5583	68.044	23	2.33245	1.23934	4.38968	0.00866341
M00599	PD	19.6316	24.9931	14	1.10897	0.637367	1.92952	0.714348
M00606	PD	19.8607	65.7722	20	1.23817	0.411565	3.72494	0.70383
M01105	PD	19.5016	29.7853	16	0.814967	0.310258	2.14071	0.67796
M01107	PD	19.3065	26.535	19	0.832392	0.569194	1.21729	0.344147
M01110	PD	19.7477	380.927	31	1.06166	0.674762	1.67041	0.79582
M01114	PD	19.6692	29.6661	15	1.03933	0.776063	1.39189	0.795774
M01121	PD	20.3544	59.031	8	0.52179	0.20962	1.29885	0.162111
M01123	PD	19.8261	50.0579	11	0.850305	0.740315	0.976636	0.0217632
M01125	PD	18.7727	28.215	18	0.942712	0.25559	3.47707	0.929407
M01284	PD	19.0029	26.4829	17	0.50306	0.217127	1.16553	0.109012
M01299	PD	18.7727	57.1759	33	0.810729	0.335282	1.96039	0.641392
M01301	PD	20.0494	70.7386	21	1.34241	0.393918	4.57473	0.637838
M01302	PD	18.5926	30.5661	23	0.809398	0.191511	3.42083	0.77369
M01303	PD	19.6679	37.8589	15	1.42871	0.647151	3.15415	0.377257
M01336	PD	19.8713	39.5743	28	0.42826	0.175266	1.04644	0.0628332
M01356	PD	19.9764	32.3388	15	0.474132	0.231981	0.969051	0.0407404
M01358	PD	19.7477	87.8667	44	0.548934	0.280051	1.07597	0.0806876
M01359	PD	19.5686	32.8621	19	0.558595	0.223537	1.39587	0.212683
M01361	PD	19.8247	29.82	19	0.540432	0.24697	1.1826	0.12351
M01365	PD	19.2196	28.1145	25	0.837702	0.446914	1.5702	0.580646
M01444	PD	19.1875	31.632	16	1.38388	0.842563	2.27296	0.199386
M01493	PD	19.3547	27.6397	11	0.802196	0.283231	2.27206	0.678193
M01494	PD	19.4348	27.8708	20	0.630413	0.189903	2.09275	0.451052
M01508	PD	18.7725	40.5703	28	0.684773	0.407684	1.15019	0.152393
M01558	PD	18.772	257.702	37	1.22905	0.656097	2.30234	0.519585
M01561	PD	19.3547	27.2458	10	0.660435	0.299036	1.4586	0.304791
M01564	PD	18.621	53.4842	47	0.601118	0.318074	1.13604	0.117063
M01572	PD	19.5583	27.1193	17	0.545125	0.216426	1.37303	0.197979
M01573	PD	19.6621	24.2788	12	0.971402	0.692242	1.36314	0.866701
M01585	PD	19.257	29.0321	22	1.43531	0.366795	5.61654	0.603655
M01604	PD	18.7727	26.1832	17	0.673121	0.169314	2.67604	0.574039
M01605	PD	19.6587	24.6468	11	1.11534	0.82094	1.51532	0.485105
M01638	PD	19.2781	26.9026	19	0.674378	0.311883	1.45819	0.316687
M01640	PD	20.272	26.0999	12	0.858873	0.742126	0.993986	0.0412629
M01642	PD	18.9429	30.5661	33	0.70974	0.365636	1.37769	0.310986
M01644	PD	19.0779	32.7349	34	0.697152	0.320785	1.5151	0.362356
M01645	PD	19.2571	30.8558	39	0.432987	0.215319	0.870696	0.0188525
M01649	PD	21.0012	45.5501	5	0.636258	0.0483861	8.36654	0.730869
M01670	PD	19.5583	24.6243	14	2.00098	0.736679	5.4351	0.17366
M01712	PD	19.0361	28.714	13	0.895988	0.475944	1.68674	0.733659
M01769	PD	18.7725	33.904	38	1.02491	0.507329	2.07054	0.945324
[truncated: 433 more rows]

## Sheet: Table S3
Table S3. Inverse-variance weighted Mendelian randomization estamites for all metabolites on the risk of the five NDDs (P<0.05)
Metabolite ID	Metabolite	NDD	IVW analysis			k0/k1	F	Status	Super pathway	N of metabolite
			OR(95% CI)	P	FDR
M00053	glutamine	AD	0.808 (0.673 ~ 0.969)	0.02164	0.563926	8/8	19.8 - 1001.7	Known	Amino acid	7821
M01358	stearate (18:0)	AD	0.932 (0.872 ~ 0.997)	0.04024	0.623313	45/45	19.8 - 1001.7	Known	Lipid	7803
M01573	guanosine	AD	0.955 (0.924 ~ 0.987)	0.00627	0.409472	14/14	19.8 - 1001.7	Known	Nucleotide	2343
M01670	urea	AD	0.906 (0.821 ~ 1.000)	0.04904	0.637325	13/13	19.8 - 1001.7	Known	Amino acid	7796
M15335	mannitol	AD	0.973 (0.952 ~ 0.994)	0.01158	0.478281	13/13	19.8 - 1001.7	Known	Carbohydrate	5917
M15676	3-methyl-2-oxovalerate	AD	1.075 (1.007 ~ 1.148)	0.03111	0.601678	39/39	19.8 - 1001.7	Known	Amino acid	7779
M20675	1,5-anhydroglucitol (1,5-AG)	AD	0.927 (0.890 ~ 0.966)	0.00032	0.146287	38/38	19.8 - 1001.7	Known	Carbohydrate	7746
M32425	dehydroisoandrosterone sulfate (DHEA-S)	AD	0.963 (0.931 ~ 0.997)	0.03474	0.611452	23/23	19.8 - 1001.7	Known	Lipid	7793
M32740	X-11423--O-sulfo-L-tyrosine	AD	0.932 (0.874 ~ 0.994)	0.03293	0.606809	55/55	19.8 - 1001.7	Identified	Amino acid	7765
M33178	2-methoxyacetaminophen sulfate	AD	0.998 (0.996 ~ 0.999)	0.00587	0.40679	620/585	19.8 - 1001.7	Known	Xenobiotics	1086
M33364	gamma-glutamylthreonine	AD	0.918 (0.855 ~ 0.986)	0.01874	0.546494	10/10	19.8 - 1001.7	Known	Peptide	4016
M33422	gamma-glutamylphenylalanine	AD	1.103 (1.026 ~ 1.186)	0.00774	0.431069	38/37	19.8 - 1001.7	Known	Peptide	7753
M34416	1-stearoylglycerophosphoethanolamine	AD	1.059 (1.003 ~ 1.119)	0.03788	0.618591	14/12	19.8 - 1001.7	Known	Lipid	7369
M35431	2-methylbutyroylcarnitine	AD	0.903 (0.842 ~ 0.967)	0.00371	0.383844	27/27	19.8 - 1001.7	Known	Amino acid	7420
M35433	hydroxyisovaleroyl carnitine	AD	0.937 (0.879 ~ 1.000)	0.04986	0.638404	8/8	19.8 - 1001.7	Known	Amino acid	5588
M35678	hexadecanedioate	AD	0.971 (0.945 ~ 0.999)	0.03929	0.621472	27/27	19.8 - 1001.7	Known	Lipid	6887
M36134	X-14208--phenylalanylserine	AD	0.968 (0.940 ~ 0.997)	0.03246	0.605531	14/13	19.8 - 1001.7	Identified	Peptide	2455
M37104	cyclo(leu-pro)	AD	1.033 (1.001 ~ 1.067)	0.04547	0.632223	14/14	19.8 - 1001.7	Known	Peptide	4833
M00064	phenylalanine	ALS	6.396 (1.285 ~ 31.845)	0.02345	0.496296	6/6	19.5 - 129.5	Known	Amino acid	7803
M01558	4-acetamidobutanoate	ALS	0.649 (0.426 ~ 0.990)	0.04478	0.571318	42/42	19.5 - 129.5	Known	Amino acid	6930
M01564	citrate	ALS	0.629 (0.414 ~ 0.957)	0.03026	0.529124	52/52	19.5 - 129.5	Known	Energy	7813
M12261	taurodeoxycholate	ALS	1.160 (1.001 ~ 1.345)	0.04914	0.579869	13/13	19.5 - 129.5	Known	Lipid	1564
M15140	kynurenine	ALS	1.500 (1.018 ~ 2.209)	0.0402	0.560702	45/44	19.5 - 129.5	Known	Amino acid	7816
M15630	N-acetylornithine	ALS	0.869 (0.781 ~ 0.966)	0.00955	0.456237	28/28	19.5 - 129.5	Known	Amino acid	7574
M15753	hippurate	ALS	1.499 (1.142 ~ 1.967)	0.00355	0.386623	14/14	19.5 - 129.5	Known	Xenobiotics	7806
M18369	gamma-glutamylleucine	ALS	1.758 (1.106 ~ 2.796)	0.01712	0.478791	38/38	19.5 - 129.5	Known	Peptide	7802
M20675	1,5-anhydroglucitol (1,5-AG)	ALS	0.705 (0.530 ~ 0.938)	0.01658	0.47782	41/40	19.5 - 129.5	Known	Carbohydrate	7746
M20699	erythritol	ALS	1.344 (1.010 ~ 1.789)	0.04259	0.566477	26/26	19.5 - 129.5	Known	Xenobiotics	7776
M21047	3-methyl-2-oxobutyrate	ALS	2.684 (1.403 ~ 5.136)	0.00287	0.365586	18/18	19.5 - 129.5	Known	Amino acid	7648
M21151	saccharin	ALS	1.147 (1.014 ~ 1.296)	0.02862	0.522307	10/10	19.5 - 129.5	Known	Xenobiotics	2449
M32980	adrenate (22:4n6)	ALS	1.621 (1.095 ~ 2.399)	0.01579	0.476289	12/12	19.5 - 129.5	Known	Lipid	7778
M33178	2-methoxyacetaminophen sulfate	ALS	0.971 (0.961 ~ 0.982)	2.31e-07	0.000103568	626/493	19.5 - 129.5	Known	Xenobiotics	1086
M33384	salicyluric glucuronide	ALS	1.072 (1.001 ~ 1.148)	0.04596	0.573766	12/12	19.5 - 129.5	Known	Xenobiotics	832
M33422	gamma-glutamylphenylalanine	ALS	1.961 (1.214 ~ 3.170)	0.00596	0.428725	37/37	19.5 - 129.5	Known	Peptide	7753
M33801	ADpSGEGDFXAEGGGVR	ALS	1.363 (1.048 ~ 1.773)	0.02089	0.484241	10/10	19.5 - 129.5	Known	Peptide	3939
M33971	10-heptadecenoate (17:1n7)	ALS	0.453 (0.233 ~ 0.881)	0.0197	0.482734	6/6	19.5 - 129.5	Known	Lipid	7795
M34214	1-arachidonoylglycerophosphoinositol	ALS	1.538 (1.106 ~ 2.138)	0.01051	0.46072	24/23	19.5 - 129.5	Known	Lipid	7797
M34390	7-methylxanthine	ALS	0.739 (0.574 ~ 0.951)	0.01881	0.481489	11/11	19.5 - 129.5	Known	Xenobiotics	5901
M36097	4-acetaminophen sulfate	ALS	0.981 (0.965 ~ 0.999)	0.03419	0.543349	26/25	19.5 - 129.5	Known	Xenobiotics	498
M36099	4-ethylphenylsulfate	ALS	1.411 (1.098 ~ 1.812)	0.00714	0.440401	8/8	19.5 - 129.5	Known	Xenobiotics	6012
M36756	leucylleucine	ALS	1.476 (1.061 ~ 2.053)	0.02077	0.484096	12/12	19.5 - 129.5	Known	Peptide	3386
M01301	lysine	FTD	0.067 (0.006 ~ 0.778)	0.03072	0.553038	25/21	29.7 - 40.8	Known	Amino acid	7812
M01358	stearate (18:0)	FTD	4.780 (1.193 ~ 19.150)	0.02717	0.543098	46/45	29.7 - 40.8	Known	Lipid	7803
M02137	biliverdin	FTD	1.681 (1.065 ~ 2.653)	0.02569	0.538276	34/31	29.7 - 40.8	Known	Cofactors and vitamins	6686
M02734	gamma-glutamyltyrosine	FTD	0.235 (0.062 ~ 0.885)	0.03235	0.556969	50/47	29.7 - 40.8	Known	Peptide	7468
M15488	acetylphosphate	FTD	41.195 (2.197 ~ 772.565)	0.01291	0.463477	19/16	29.7 - 40.8	Known	Energy	7789
M15676	3-methyl-2-oxovalerate	FTD	0.148 (0.033 ~ 0.662)	0.01239	0.458107	39/35	29.7 - 40.8	Known	Amino acid	7779
M20699	erythritol	FTD	3.137 (1.036 ~ 9.499)	0.04308	0.595113	26/21	29.7 - 40.8	Known	Xenobiotics	7776
M31536	N-(2-furoyl)glycine	FTD	1.336 (1.007 ~ 1.773)	0.04488	0.600441	24/16	29.7 - 40.8	Known	Xenobiotics	604
M31591	androsterone sulfate	FTD	0.652 (0.458 ~ 0.927)	0.01712	0.497662	30/26	29.7 - 40.8	Known	Lipid	7785
M32315	serine	FTD	0.222 (0.060 ~ 0.821)	0.02403	0.532281	40/39	29.7 - 40.8	Known	Amino acid	7796
M32379	scyllo-inositol	FTD	3.419 (1.174 ~ 9.954)	0.02416	0.532775	14/13	29.7 - 40.8	Known	Lipid	6500
M33178	2-methoxyacetaminophen sulfate	FTD	0.924 (0.885 ~ 0.964)	0.00026	0.0481915	631/268	29.7 - 40.8	Known	Xenobiotics	1086
M33453	alpha-ketoglutarate	FTD	4.535 (1.491 ~ 13.792)	0.00772	0.390202	20/15	29.7 - 40.8	Known	Energy	6130
M33477	erythronate	FTD	0.198 (0.045 ~ 0.869)	0.03179	0.555658	50/43	29.7 - 40.8	Known	Carbohydrate	7752
M33961	1-stearoylglycerophosphocholine	FTD	0.203 (0.045 ~ 0.910)	0.03731	0.575426	13/12	29.7 - 40.8	Known	Lipid	7817
M33973	epiandrosterone sulfate	FTD	0.475 (0.272 ~ 0.830)	0.00895	0.412496	17/15	29.7 - 40.8	Known	Lipid	7769
M34878	X-13183--stearamide	FTD	2.534 (1.078 ~ 5.959)	0.03305	0.558554	13/9	29.7 - 40.8	Identified	Lipid	2503
M35669	tetradecanedioate	FTD	1.836 (1.061 ~ 3.175)	0.02984	0.550763	25/21	29.7 - 40.8	Known	Lipid	6046
M35678	hexadecanedioate	FTD	1.865 (1.034 ~ 3.362)	0.03828	0.57905	28/24	29.7 - 40.8	Known	Lipid	6887
M37506	palmitoyl sphingomyelin	FTD	4.554 (1.008 ~ 20.577)	0.04885	0.611081	49/43	29.7 - 40.8	Known	Lipid	7814
M00575	arabinose	PD	2.212 (1.132 ~ 4.325)	0.02028	0.512437	7/6	19.5 - 88.9	Known	Carbohydrate	5889
M00584	mannose	PD	2.688 (1.538 ~ 4.698)	0.00052	0.163995	29/28	19.5 - 88.9	Known	Carbohydrate	7793
M01123	inosine	PD	0.835 (0.731 ~ 0.954)	0.00782	0.373083	13/13	19.5 - 88.9	Known	Nucleotide	2675
M01336	palmitate (16:0)	PD	0.417 (0.176 ~ 0.986)	0.04642	0.624238	29/29	19.5 - 88.9	Known	Lipid	7800
M01358	stearate (18:0)	PD	0.481 (0.242 ~ 0.958)	0.03732	0.599495	41/41	19.5 - 88.9	Known	Lipid	7803
M01564	citrate	PD	0.501 (0.254 ~ 0.990)	0.04655	0.624534	46/43	19.5 - 88.9	Known	Energy	7813
M01640	ascorbate (Vitamin C)	PD	0.847 (0.735 ~ 0.976)	0.0216	0.522594	14/14	19.5 - 88.9	Known	Cofactors and vitamins	2085
M01645	laurate (12:0)	PD	0.482 (0.245 ~ 0.948)	0.03458	0.590042	41/41	19.5 - 88.9	Known	Lipid	7793
M02342	serotonin (5HT)	PD	0.477 (0.276 ~ 0.826)	0.00819	0.376446	16/16	19.5 - 88.9	Known	Amino acid	6139
M15749	3-phenylpropionate (hydrocinnamate)	PD	1.628 (1.086 ~ 2.442)	0.01835	0.49585	16/16	19.5 - 88.9	Known	Amino acid	6182
M19324	1-stearoylglycerophosphoinositol	PD	0.527 (0.308 ~ 0.903)	0.01973	0.507934	7/7	19.5 - 88.9	Known	Lipid	7694
M21188	1-stearoylglycerol (1-monostearin)	PD	2.055 (1.176 ~ 3.591)	0.01139	0.410527	26/26	19.5 - 88.9	Known	Lipid	6965
M27728	glycerol 2-phosphate	PD	1.681 (1.032 ~ 2.738)	0.03681	0.597821	30/30	19.5 - 88.9	Known	Xenobiotics	5912
M32709	X-03056--N-[3-(2-Oxopyrrolidin-1-yl)propyl]acetamide	PD	0.603 (0.421 ~ 0.863)	0.00573	0.347984	36/36	19.5 - 88.9	Identified	Amino acid	7812
M33228	1-arachidonoylglycerophosphocholine	PD	0.624 (0.413 ~ 0.942)	0.02487	0.544392	23/23	19.5 - 88.9	Known	Lipid	7507
M34365	3-(cystein-S-yl)acetaminophen	PD	0.949 (0.914 ~ 0.985)	0.00625	0.355428	58/58	19.5 - 88.9	Known	Xenobiotics	1024
M34420	bradykinin, des-arg(9)	PD	0.843 (0.751 ~ 0.947)	0.004	0.31382	26/26	19.5 - 88.9	Known	Peptide	4570
M35127	pro-hydroxy-pro	PD	0.460 (0.230 ~ 0.919)	0.02795	0.561439	18/18	19.5 - 88.9	Known	Peptide	7787
M36230	X-14304--leucylalanine	PD	1.416 (1.065 ~ 1.884)	0.01686	0.48138	20/20	19.5 - 88.9	Identified	Peptide	2434
M36738	gamma-glutamylglutamate	PD	1.479 (1.030 ~ 2.123)	0.03383	0.587246	10/10	19.5 - 88.9	Known	Peptide	931
M01123	inosine	MS	0.839 (0.705 ~ 0.998)	0.04773	0.740113	11/11	12.3 - 69.1	Known	Nucleotide	2675
M01299	tyrosine	MS	3.170 (1.498 ~ 6.705)	0.00254	0.210185	32/32	12.3 - 69.1	Known	Amino acid	7807
M01712	cortisol	MS	1.842 (1.084 ~ 3.128)	0.02382	0.630918	13/13	12.3 - 69.1	Known	Lipid	7795
M15122	glycerol	MS	0.488 (0.255 ~ 0.935)	0.03062	0.675072	16/16	12.3 - 69.1	Known	Lipid	7800
M17805	dihomo-linoleate (20:2n6)	MS	2.050 (1.143 ~ 3.677)	0.01599	0.551395	10/10	12.3 - 69.1	Known	Lipid	7800
M31591	androsterone sulfate	MS	0.856 (0.749 ~ 0.978)	0.02205	0.616346	29/28	12.3 - 69.1	Known	Lipid	7785
M32328	hexanoylcarnitine	MS	1.388 (1.035 ~ 1.863)	0.02855	0.663282	24/24	12.3 - 69.1	Known	Lipid	7786
M33084	ADSGEGDFXAEGGGVR	MS	1.583 (1.103 ~ 2.273)	0.0128	0.503299	9/9	12.3 - 69.1	Known	Peptide	5588
M33230	1-palmitoleoylglycerophosphocholine	MS	1.939 (1.053 ~ 3.572)	0.03357	0.689935	14/14	12.3 - 69.1	Known	Lipid	7812
M33801	ADpSGEGDFXAEGGGVR	MS	0.580 (0.407 ~ 0.828)	0.00266	0.210185	9/8	12.3 - 69.1	Known	Peptide	3939
M33936	octanoylcarnitine	MS	1.330 (1.018 ~ 1.737)	0.03663	0.703363	22/22	12.3 - 69.1	Known	Lipid	7790
M33955	1-palmitoylglycerophosphocholine	MS	2.505 (1.215 ~ 5.165)	0.01286	0.504328	29/29	12.3 - 69.1	Known	Lipid	7803
M34035	linolenate [alpha or gamma; (18:3n3 or 6)]	MS	4.899 (1.767 ~ 13.580)	0.00225	0.210185	4/4	12.3 - 69.1	Known	Lipid	7786
M34407	isovalerylcarnitine	MS	1.711 (1.196 ~ 2.446)	0.00326	0.220796	26/25	12.3 - 69.1	Known	Amino acid	7789
M34420	bradykinin, des-arg(9)	MS	1.139 (1.004 ~ 1.293)	0.04284	0.725828	23/20	12.3 - 69.1	Known	Peptide	4570
M34456	gamma-glutamylisoleucine	MS	0.630 (0.403 ~ 0.985)	0.04258	0.724994	24/23	12.3 - 69.1	Known	Peptide	5522
M35254	2-oleoylglycerophosphocholine	MS	0.455 (0.217 ~ 0.954)	0.03713	0.705391	13/13	12.3 - 69.1	Known	Lipid	7524
M35257	2-linoleoylglycerophosphocholine	MS	0.527 (0.297 ~ 0.936)	0.02884	0.66501	19/18	12.3 - 69.1	Known	Lipid	6894
M17807	X-18601	AD	0.966 (0.937 ~ 0.996)	0.0277	0.590557	24/24	19.8 - 1001.7	Unknown	-	7663
M22481	X-08988	AD	1.061 (1.014 ~ 1.110)	0.00992	0.453489	41/41	19.8 - 1001.7	Unknown	-	7776
M32634	X-11317	AD	1.112 (1.034 ~ 1.195)	0.00397	0.387737	46/44	19.8 - 1001.7	Unknown	-	7811
M32753	X-09789	AD	0.956 (0.923 ~ 0.989)	0.00959	0.450626	14/14	19.8 - 1001.7	Unknown	-	7805
M32846	X-11529	AD	0.983 (0.971 ~ 0.995)	0.00614	0.408635	28/28	19.8 - 1001.7	Unknown	-	6664
M33391	X-12040	AD	1.008 (1.000 ~ 1.015)	0.03847	0.619819	21/20	19.8 - 1001.7	Unknown	-	559
M33408	X-12056	AD	1.029 (1.003 ~ 1.056)	0.03033	0.59932	14/14	19.8 - 1001.7	Unknown	-	4130
M34245	X-12645	AD	1.040 (1.001 ~ 1.081)	0.04551	0.632284	21/20	19.8 - 1001.7	Unknown	-	5254
M34306	X-12696	AD	0.966 (0.940 ~ 0.993)	0.01357	0.502347	27/27	19.8 - 1001.7	Unknown	-	7409
M34344	X-12734	AD	0.982 (0.966 ~ 0.997)	0.01947	0.551261	14/14	19.8 - 1001.7	Unknown	-	5616
M34513	X-12830	AD	0.962 (0.929 ~ 0.996)	0.03087	0.600964	13/13	19.8 - 1001.7	Unknown	-	3415
M34533	X-12850	AD	0.965 (0.937 ~ 0.994)	0.02012	0.555279	19/18	19.8 - 1001.7	Unknown	-	6251
M35187	X-13429	AD	0.975 (0.953 ~ 0.997)	0.02908	0.595321	12/12	19.8 - 1001.7	Unknown	-	6344
M35464	X-13671	AD	0.885 (0.811 ~ 0.965)	0.00597	0.407491	15/15	19.8 - 1001.7	Unknown	-	7311
M36553	X-14626	AD	0.956 (0.919 ~ 0.994)	0.02358	0.573654	24/24	19.8 - 1001.7	Unknown	-	6904
M19364	X-06246	ALS	0.686 (0.476 ~ 0.987)	0.04254	0.566362	21/20	19.5 - 129.5	Unknown	-	7358
M19368	X-06267	ALS	0.525 (0.303 ~ 0.910)	0.02164	0.48511	13/13	19.5 - 129.5	Unknown	-	7075
M22649	X-09108	ALS	0.483 (0.234 ~ 0.999)	0.04959	0.580679	13/13	19.5 - 129.5	Unknown	-	6910
M32761	X-11444	ALS	1.325 (1.003 ~ 1.749)	0.04745	0.576711	22/22	19.5 - 129.5	Unknown	-	7758
M32857	X-11540	ALS	0.709 (0.518 ~ 0.970)	0.03135	0.533347	8/8	19.5 - 129.5	Unknown	-	2688
M33507	X-12092	ALS	1.104 (1.023 ~ 1.192)	0.0114	0.464263	40/40	19.5 - 129.5	Unknown	-	7500
M33508	X-12093	ALS	1.192 (1.047 ~ 1.358)	0.00811	0.447767	20/20	19.5 - 129.5	Unknown	-	2854
M33782	X-10346	ALS	1.166 (1.039 ~ 1.309)	0.0093	0.454934	15/14	19.5 - 129.5	Unknown	-	4207
M34221	X-12627	ALS	1.407 (1.010 ~ 1.960)	0.04345	0.568427	14/13	19.5 - 129.5	Unknown	-	7419
M34306	X-12696	ALS	0.770 (0.642 ~ 0.924)	0.00488	0.414027	28/28	19.5 - 129.5	Unknown	-	7409
M34761	X-13069	ALS	0.682 (0.501 ~ 0.929)	0.01506	0.474741	19/19	19.5 - 129.5	Unknown	-	6770
M36552	X-14625	ALS	1.954 (1.050 ~ 3.635)	0.03446	0.544232	20/20	19.5 - 129.5	Unknown	-	7511
M27256	X-10500	FTD	11.790 (1.839 ~ 75.568)	0.00924	0.417191	38/33	29.7 - 40.8	Unknown	-	7751
M30805	X-10810	FTD	2.741 (1.022 ~ 7.353)	0.04523	0.601438	17/16	29.7 - 40.8	Unknown	-	7232
M32802	X-11485	FTD	3.122 (1.121 ~ 8.696)	0.02935	0.549446	8/7	29.7 - 40.8	Unknown	-	4544
M32808	X-11491	FTD	1.890 (1.101 ~ 3.247)	0.02103	0.519508	19/18	29.7 - 40.8	Unknown	-	6584
M32846	X-11529	FTD	1.604 (1.250 ~ 2.059)	0.0002	0.0481915	28/24	29.7 - 40.8	Unknown	-	6664
M32855	X-11538	FTD	2.220 (1.303 ~ 3.782)	0.00333	0.256973	25/21	29.7 - 40.8	Unknown	-	7804
M33163	X-11818	FTD	9.535 (2.591 ~ 35.089)	0.00069	0.0779347	20/18	29.7 - 40.8	Unknown	-	6790
M33165	X-11820	FTD	0.364 (0.144 ~ 0.921)	0.0328	0.557994	16/12	29.7 - 40.8	Unknown	-	7710
M33250	X-11905	FTD	1.753 (1.083 ~ 2.839)	0.02239	0.525645	25/20	29.7 - 40.8	Unknown	-	4761
M33389	X-12038	FTD	5.886 (1.745 ~ 19.857)	0.00427	0.296113	60/58	29.7 - 40.8	Unknown	-	7758
M33415	X-12063	FTD	1.820 (1.153 ~ 2.872)	0.01018	0.431178	25/22	29.7 - 40.8	Unknown	-	7197
M34344	X-12734	FTD	0.632 (0.400 ~ 0.999)	0.04966	0.613084	14/10	29.7 - 40.8	Unknown	-	5616
M35187	X-13429	FTD	2.284 (1.457 ~ 3.581)	0.00032	0.0481915	12/12	29.7 - 40.8	Unknown	-	6344
M36553	X-14626	FTD	2.550 (1.076 ~ 6.041)	0.03343	0.55939	24/22	29.7 - 40.8	Unknown	-	6904
M16821	X-04498	PD	1.905 (1.071 ~ 3.388)	0.02827	0.56305	19/19	19.5 - 88.9	Unknown	-	7160
M22649	X-09108	PD	0.335 (0.118 ~ 0.955)	0.04069	0.609705	12/12	19.5 - 88.9	Unknown	-	6910
M32735	X-01911	PD	1.618 (1.214 ~ 2.156)	0.00102	0.163995	17/17	19.5 - 88.9	Unknown	-	6360
M33140	X-11795	PD	2.436 (1.063 ~ 5.585)	0.0354	0.592992	10/10	19.5 - 88.9	Unknown	-	7763
M33165	X-11820	PD	1.561 (1.111 ~ 2.193)	0.01027	0.39879	15/15	19.5 - 88.9	Unknown	-	7710
M33192	X-11847	PD	1.445 (1.159 ~ 1.800)	0.00105	0.163995	13/13	19.5 - 88.9	Unknown	-	6059
M33380	X-12029	PD	0.404 (0.195 ~ 0.837)	0.01476	0.457964	40/40	19.5 - 88.9	Unknown	-	7564
M33508	X-12093	PD	0.823 (0.686 ~ 0.987)	0.03515	0.592104	18/18	19.5 - 88.9	Unknown	-	2854
M33877	X-12435	PD	1.092 (1.022 ~ 1.166)	0.00899	0.382938	33/33	19.5 - 88.9	Unknown	-	231
M34327	X-12717	PD	1.416 (1.117 ~ 1.795)	0.0041	0.316329	9/9	19.5 - 88.9	Unknown	-	1632
M34441	X-12771	PD	1.480 (1.027 ~ 2.133)	0.03534	0.59278	16/16	19.5 - 88.9	Unknown	-	4734
M36585	X-14658	PD	0.654 (0.431 ~ 0.991)	0.04497	0.62085	12/11	19.5 - 88.9	Unknown	-	3533
M36673	X-14745	PD	2.430 (1.263 ~ 4.675)	0.0078	0.372894	13/13	19.5 - 88.9	Unknown	-	5602
M19368	X-06267	MS	3.734 (1.687 ~ 8.265)	0.00116	0.210185	10/9	12.3 - 69.1	Unknown	-	7075
M22649	X-09108	MS	0.383 (0.156 ~ 0.938)	0.0358	0.699898	12/11	12.3 - 69.1	Unknown	-	6910
M32753	X-09789	MS	1.424 (1.063 ~ 1.908)	0.01771	0.572723	13/13	12.3 - 69.1	Unknown	-	7805
M33132	X-11787	MS	0.409 (0.245 ~ 0.685)	0.00067	0.210185	36/36	12.3 - 69.1	Unknown	-	7811
M33163	X-11818	MS	0.525 (0.327 ~ 0.842)	0.00748	0.383915	20/20	12.3 - 69.1	Unknown	-	6790
M33507	X-12092	MS	0.894 (0.811 ~ 0.986)	0.02474	0.637904	37/37	12.3 - 69.1	Unknown	-	7500
M33610	X-12189	MS	1.082 (1.002 ~ 1.169)	0.04463	0.731354	32/25	12.3 - 69.1	Unknown	-	481
M34062	X-12524	MS	2.513 (1.019 ~ 6.199)	0.04546	0.733795	25/24	12.3 - 69.1	Unknown	-	7809
M34350	X-12740	MS	1.322 (1.108 ~ 1.578)	0.00199	0.210185	13/13	12.3 - 69.1	Unknown	-	3731
M34912	X-13215	MS	0.511 (0.297 ~ 0.878)	0.01498	0.537499	43/41	12.3 - 69.1	Unknown	-	6305
M35464	X-13671	MS	2.030 (1.003 ~ 4.108)	0.0491	0.743691	15/14	12.3 - 69.1	Unknown	-	7311
Note: NDD: neurodegenerative disease; AD: Alzheimer’s disease; ALS: amyotrophic lateral sclerosis; FTD: frontotemporal dementia; PD: Parkinson’s disease; MS: multiple sclerosis

## Sheet: Table S4
Table S4. Inverse-variance weighted Mendelian randomization estimates for metabolites on the risk of the two NDDs via different thresholds (FDR<0.05)
Metabolite ID	Metabolite	NDD	r2	IVW analysis
				OR (95% CI)	P
M33178	2-methoxyacetaminophen sulfate	ALS	<0.1	0.971 (0.961 ~ 0.982)	2.31e-07
			<0.001	0.968 (0.957 ~ 0.980)	4.57e-08
M33178	2-methoxyacetaminophen sulfate	FTD	<0.1	0.924 (0.885 ~ 0.964)	0.00026
			<0.001	0.916 (0.876 ~ 0.958)	0.000113
M32846	X-11529	FTD	<0.1	1.604 (1.250 ~ 2.059)	0.0002
			<0.001	1.432 (1.035 ~ 1.982)	0.0303
M35187	X-13429	FTD	<0.1	2.284 (1.457 ~ 3.581)	0.00032
			<0.001	1.802 (1.055 ~ 3.080)	0.0312

## Sheet: Table S5
Table S5. Sensitivity estamites for metabolites on the risk of the five NDDs
Metabolite ID	Metabolite	NDD	MR-Egger test			MR-Egger Intercept			Weight median test			Likelihood test
			OR(95% CI)	P		OR(95% CI)	P		OR(95% CI)	P		OR(95% CI)	P
M00053	glutamine	AD	0.625 (0.450 ~ 0.868)	0.00997168		1.0030 (0.9998 ~ 1.0061)	0.065176		0.723 (0.563 ~ 0.928)	0.0109406		0.806 (0.672 ~ 0.968)	0.0209338
M01358	stearate (18:0)	AD	0.942 (0.792 ~ 1.120)	0.489201		0.9999 (0.9980 ~ 1.0017)	0.895372		0.892 (0.807 ~ 0.985)	0.0243178		0.933 (0.869 ~ 1.001)	0.052713
M01573	guanosine	AD	0.910 (0.835 ~ 0.993)	0.0342064		1.0026 (0.9982 ~ 1.0071)	0.243763		0.949 (0.906 ~ 0.993)	0.0238347		0.955 (0.923 ~ 0.988)	0.00838569
M01670	urea	AD	0.901 (0.604 ~ 1.346)	0.580547		1.0001 (0.9940 ~ 1.0062)	0.976426		0.903 (0.780 ~ 1.045)	0.170744		0.906 (0.802 ~ 1.023)	0.111097
M15335	mannitol	AD	0.962 (0.907 ~ 1.020)	0.171402		1.0010 (0.9966 ~ 1.0053)	0.636525		0.977 (0.947 ~ 1.008)	0.143701		0.973 (0.951 ~ 0.994)	0.0139081
M15676	3-methyl-2-oxovalerate	AD	1.056 (0.909 ~ 1.227)	0.46519		1.0002 (0.9985 ~ 1.0020)	0.78398		1.042 (0.934 ~ 1.162)	0.465555		1.076 (0.997 ~ 1.162)	0.0595508
M20675	1,5-anhydroglucitol (1,5-AG)	AD	0.911 (0.818 ~ 1.014)	0.0845789		1.0004 (0.9983 ~ 1.0026)	0.6958		0.898 (0.841 ~ 0.958)	0.00107503		0.928 (0.884 ~ 0.975)	0.0027502
M32425	dehydroisoandrosterone sulfate (DHEA-S)	AD	0.949 (0.857 ~ 1.051)	0.312041		1.0005 (0.9974 ~ 1.0035)	0.755482		0.955 (0.909 ~ 1.002)	0.0600415		0.964 (0.930 ~ 0.998)	0.0403564
M32740	X-11423--O-sulfo-L-tyrosine	AD	0.811 (0.638 ~ 1.032)	0.0869939		1.0015 (0.9991 ~ 1.0038)	0.224783		0.890 (0.805 ~ 0.984)	0.0232861		0.929 (0.856 ~ 1.009)	0.079024
M33178	2-methoxyacetaminophen sulfate	AD	0.998 (0.993 ~ 1.003)	0.359562		1.0001 (0.9986 ~ 1.0015)	0.942233		0.997 (0.995 ~ 1.000)	0.0190955		0.998 (0.996 ~ 0.999)	0.00837699
M33364	gamma-glutamylthreonine	AD	0.990 (0.790 ~ 1.240)	0.91985		0.9980 (0.9924 ~ 1.0035)	0.425597		0.930 (0.842 ~ 1.028)	0.154		0.917 (0.850 ~ 0.990)	0.0262654
M33422	gamma-glutamylphenylalanine	AD	1.083 (0.940 ~ 1.248)	0.260376		1.0003 (0.9986 ~ 1.0019)	0.747974		1.066 (0.941 ~ 1.208)	0.317896		1.106 (1.021 ~ 1.199)	0.0140455
M34416	1-stearoylglycerophosphoethanolamine	AD	1.103 (0.980 ~ 1.242)	0.102845		0.9988 (0.9958 ~ 1.0018)	0.447542		1.076 (0.999 ~ 1.159)	0.0523446		1.063 (1.005 ~ 1.123)	0.0328373
M35431	2-methylbutyroylcarnitine	AD	0.961 (0.747 ~ 1.236)	0.747894		0.9989 (0.9947 ~ 1.0031)	0.589382		0.890 (0.805 ~ 0.983)	0.0222537		0.904 (0.833 ~ 0.981)	0.0154212
M35433	hydroxyisovaleroyl carnitine	AD	0.970 (0.842 ~ 1.116)	0.626532		0.9988 (0.9947 ~ 1.0030)	0.534527		0.925 (0.847 ~ 1.010)	0.0829562		0.935 (0.874 ~ 1.000)	0.0513186
M35678	hexadecanedioate	AD	0.938 (0.880 ~ 0.999)	0.0481792		1.0016 (0.9992 ~ 1.0040)	0.19169		0.958 (0.920 ~ 0.997)	0.034784		0.971 (0.939 ~ 1.004)	0.0870923
M36134	X-14208--phenylalanylserine	AD	0.980 (0.930 ~ 1.033)	0.450847		0.9991 (0.9961 ~ 1.0022)	0.570733		0.972 (0.931 ~ 1.015)	0.192349		0.967 (0.938 ~ 0.998)	0.034936
M37104	cyclo(leu-pro)	AD	1.030 (0.973 ~ 1.090)	0.311992		1.0002 (0.9977 ~ 1.0027)	0.891651		1.033 (0.987 ~ 1.081)	0.160499		1.034 (1.001 ~ 1.068)	0.0456044
M00064	phenylalanine	ALS	5.092 (0.191 ~ 135.779)	0.331269		1.0025 (0.9714 ~ 1.0346)	0.875957		8.04 (1.085 ~ 59.584)	0.0413777		6.476 (1.251 ~ 33.526)	0.0259608
M01558	4-acetamidobutanoate	ALS	0.836 (0.213 ~ 3.284)	0.792657		0.9969 (0.9814 ~ 1.0125)	0.685202		1.032 (0.510 ~ 2.090)	0.929883		0.634 (0.367 ~ 1.094)	0.101698
M01564	citrate	ALS	0.349 (0.093 ~ 1.316)	0.117481		1.0065 (0.9928 ~ 1.0205)	0.346829		0.758 (0.406 ~ 1.416)	0.38472		0.641 (0.407 ~ 1.010)	0.0553753
M12261	taurodeoxycholate	ALS	1.132 (0.642 ~ 1.997)	0.639915		1.0017 (0.9643 ~ 1.0406)	0.922641		1.143 (0.929 ~ 1.406)	0.207483		1.173 (1.008 ~ 1.364)	0.0385381
M15140	kynurenine	ALS	2.825 (1.110 ~ 7.193)	0.0302177		0.9914 (0.9803 ~ 1.0026)	0.127518		1.684 (0.926 ~ 3.062)	0.0875986		1.525 (0.976 ~ 2.382)	0.0638456
M15630	N-acetylornithine	ALS	0.915 (0.787 ~ 1.065)	0.252773		0.9953 (0.9856 ~ 1.0050)	0.340064		0.910 (0.791 ~ 1.046)	0.18509		0.869 (0.780 ~ 0.967)	0.00994667
M15753	hippurate	ALS	1.328 (0.435 ~ 4.058)	0.58984		1.0045 (0.9665 ~ 1.0439)	0.805757		1.780 (1.186 ~ 2.671)	0.00535854		1.558 (1.088 ~ 2.232)	0.0156017
M18369	gamma-glutamylleucine	ALS	1.938 (0.645 ~ 5.823)	0.230666		0.9988 (0.9870 ~ 1.0108)	0.842549		1.775 (0.877 ~ 3.593)	0.110452		1.814 (1.121 ~ 2.934)	0.0152223
M20675	1,5-anhydroglucitol (1,5-AG)	ALS	0.672 (0.292 ~ 1.549)	0.341157		1.0010 (0.9856 ~ 1.0166)	0.898421		0.650 (0.419 ~ 1.008)	0.0545504		0.715 (0.506 ~ 1.009)	0.0562065
M20699	erythritol	ALS	1.049 (0.650 ~ 1.693)	0.843643		1.0076 (0.9958 ~ 1.0195)	0.206057		1.220 (0.786 ~ 1.893)	0.3753		1.357 (1.006 ~ 1.832)	0.0458986
M21047	3-methyl-2-oxobutyrate	ALS	6.962 (0.681 ~ 71.189)	0.101839		0.9867 (0.9562 ~ 1.0182)	0.402631		3.135 (1.287 ~ 7.637)	0.0118964		2.791 (1.433 ~ 5.437)	0.00255195
M21151	saccharin	ALS	1.094 (0.878 ~ 1.362)	0.423849		1.0059 (0.9833 ~ 1.0290)	0.609551		1.108 (0.941 ~ 1.305)	0.220139		1.150 (1.012 ~ 1.306)	0.0320449
M32980	adrenate (22:4n6)	ALS	0.489 (0.149 ~ 1.601)	0.208456		1.0336 (1.0031 ~ 1.0652)	0.0340033		1.301 (0.736 ~ 2.300)	0.365942		1.654 (0.983 ~ 2.785)	0.0582018
M33178	2-methoxyacetaminophen sulfate	ALS	0.963 (0.934 ~ 0.993)	0.0171424		1.0026 (0.9939 ~ 1.0114)	0.55251		0.967 (0.951 ~ 0.984)	0.000180507		0.971 (0.960 ~ 0.983)	1.72383e-06
M33384	salicyluric glucuronide	ALS	1.091 (0.928 ~ 1.282)	0.25852		0.9957 (0.9623 ~ 1.0302)	0.784043		1.061 (0.962 ~ 1.169)	0.234714		1.075 (0.997 ~ 1.159)	0.0602397
M33422	gamma-glutamylphenylalanine	ALS	2.084 (0.720 ~ 6.037)	0.169732		0.9992 (0.9872 ~ 1.0113)	0.892255		2.658 (1.102 ~ 6.415)	0.0295932		1.985 (1.155 ~ 3.412)	0.0131446
M33801	ADpSGEGDFXAEGGGVR	ALS	1.964 (0.918 ~ 4.201)	0.081816		0.9841 (0.9538 ~ 1.0154)	0.315637		1.293 (0.901 ~ 1.855)	0.162938		1.375 (1.051 ~ 1.798)	0.0201745
M33971	10-heptadecenoate (17:1n7)	ALS	0.160 (0.003 ~ 7.470)	0.350306		1.0202 (0.9486 ~ 1.0972)	0.590744		0.449 (0.187 ~ 1.082)	0.0742912		0.450 (0.229 ~ 0.886)	0.0208356
M34214	1-arachidonoylglycerophosphoinositol	ALS	1.400 (0.740 ~ 2.649)	0.294489		1.0023 (0.9889 ~ 1.0159)	0.730721		1.156 (0.709 ~ 1.884)	0.562316		1.563 (1.111 ~ 2.198)	0.0102499
M34390	7-methylxanthine	ALS	0.555 (0.141 ~ 2.177)	0.355167		1.0108 (0.9622 ~ 1.0619)	0.633382		0.671 (0.463 ~ 0.974)	0.0358188		0.742 (0.536 ~ 1.028)	0.0725371
M36097	4-acetaminophen sulfate	ALS	1.013 (0.953 ~ 1.077)	0.670131		0.9842 (0.9565 ~ 1.0128)	0.261845		0.977 (0.951 ~ 1.004)	0.0989625		0.981 (0.959 ~ 1.004)	0.108474
M36099	4-ethylphenylsulfate	ALS	1.629 (0.918 ~ 2.892)	0.0847577		0.9915 (0.9617 ~ 1.0221)	0.568413		1.409 (1.005 ~ 1.976)	0.0465912		1.422 (1.098 ~ 1.843)	0.00769485
M36756	leucylleucine	ALS	1.597 (0.535 ~ 4.771)	0.401534		0.9978 (0.9692 ~ 1.0273)	0.882001		1.539 (0.981 ~ 2.416)	0.060667		1.482 (1.059 ~ 2.073)	0.0216385
M01301	lysine	FTD	0.002 (0 ~ 595.935)	0.308217		1.0364 (0.9180 ~ 1.1701)	0.545714		0.398 (0.011 ~ 15.044)	0.619403		0.071 (0.006 ~ 0.898)	0.0410203
M01358	stearate (18:0)	FTD	0.611 (0.013 ~ 28.752)	0.801774		1.0229 (0.9833 ~ 1.0641)	0.261696		2.833 (0.371 ~ 21.633)	0.315295		5.083 (1.234 ~ 20.944)	0.0244149
M02137	biliverdin	FTD	1.172 (0.501 ~ 2.746)	0.714025		1.0190 (0.9815 ~ 1.0579)	0.325457		1.713 (0.876 ~ 3.349)	0.1155		1.691 (1.067 ~ 2.678)	0.0252509
M02734	gamma-glutamyltyrosine	FTD	14.167 (0.051 ~ 3921.347)	0.347442		0.9601 (0.9098 ~ 1.0133)	0.135332		0.124 (0.018 ~ 0.875)	0.0362519		0.248 (0.056 ~ 1.093)	0.065313
M15488	acetylphosphate	FTD	0.413 (0 ~ 1054600.995)	0.903611		1.0407 (0.9183 ~ 1.1793)	0.519191		7.483 (0.131 ~ 427.343)	0.329432		49.174 (2.407 ~ 1004.432)	0.0113817
M15676	3-methyl-2-oxovalerate	FTD	0.147 (0.002 ~ 9.561)	0.368278		1.0001 (0.9592 ~ 1.0427)	0.996831		0.121 (0.015 ~ 0.993)	0.0492251		0.140 (0.030 ~ 0.648)	0.0118471
M20699	erythritol	FTD	4.288 (0.601 ~ 30.584)	0.146436		0.9921 (0.9522 ~ 1.0337)	0.705926		3.421 (0.592 ~ 19.774)	0.16951		3.298 (1.052 ~ 10.335)	0.0406054
M31536	N-(2-furoyl)glycine	FTD	1.168 (0.799 ~ 1.707)	0.412692		0.9950 (0.9515 ~ 1.0404)	0.820254		1.340 (1.036 ~ 1.733)	0.0260469		1.131 (0.940 ~ 1.360)	0.192552
M31591	androsterone sulfate	FTD	0.635 (0.298 ~ 1.352)	0.22713		1.0020 (0.9570 ~ 1.0490)	0.928896		-	-		-	-
M32315	serine	FTD	0.440 (0.006 ~ 31.840)	0.699786		0.9916 (0.9437 ~ 1.0420)	0.732638		0.311 (0.044 ~ 2.210)	0.242974		0.237 (0.055 ~ 1.017)	0.0526652
M32379	scyllo-inositol	FTD	3.322 (0.201 ~ 54.804)	0.366183		1.0009 (0.9239 ~ 1.0843)	0.980382		2.665 (0.609 ~ 11.653)	0.192934		3.527 (1.187 ~ 10.474)	0.0232473
M33178	2-methoxyacetaminophen sulfate	FTD	0.912 (0.819 ~ 1.015)	0.0908844		1.0039 (0.9753 ~ 1.0333)	0.792497		0.905 (0.844 ~ 0.970)	0.00499037		0.923 (0.882 ~ 0.967)	0.000641705
M33453	alpha-ketoglutarate	FTD	4.848 (0.327 ~ 71.955)	0.251417		0.9984 (0.9407 ~ 1.0596)	0.957575		4.441 (0.923 ~ 21.376)	0.0629286		4.641 (1.492 ~ 14.44)	0.00803647
M33477	erythronate	FTD	0.049 (0 ~ 150.329)	0.452543		1.0136 (0.9395 ~ 1.0935)	0.721986		0.249 (0.029 ~ 2.159)	0.206939		0.191 (0.041 ~ 0.879)	0.0335294
M33961	1-stearoylglycerophosphocholine	FTD	0.924 (0.004 ~ 201.556)	0.9745		0.9673 (0.8661 ~ 1.0803)	0.517648		0.128 (0.015 ~ 1.060)	0.056609		0.216 (0.041 ~ 1.138)	0.0706809
M33973	epiandrosterone sulfate	FTD	0.472 (0.076 ~ 2.915)	0.389011		1.0004 (0.9170 ~ 1.0913)	0.993097		0.667 (0.294 ~ 1.513)	0.332771		0.464 (0.209 ~ 1.031)	0.0594748
M34878	X-13183--stearamide	FTD	0.786 (0.159 ~ 3.884)	0.767356		1.0639 (0.9906 ~ 1.1426)	0.0890938		2.156 (0.656 ~ 7.088)	0.205701		2.636 (1.079 ~ 6.440)	0.0334066
M35669	tetradecanedioate	FTD	1.914 (0.650 ~ 5.634)	0.238844		0.9979 (0.9531 ~ 1.0449)	0.930227		2.240 (0.997 ~ 5.035)	0.0509518		1.875 (1.070 ~ 3.287)	0.0281016
M35678	hexadecanedioate	FTD	5.770 (1.764 ~ 18.872)	0.0037493		0.9555 (0.9168 ~ 0.9959)	0.0312935		3.659 (1.540 ~ 8.694)	0.00329973		1.908 (1.050 ~ 3.467)	0.034115
M37506	palmitoyl sphingomyelin	FTD	157846.471 (86.857 ~ 286856890.339)	0.00250387		0.9063 (0.8460 ~ 0.9709)	0.00622033		1.802 (0.181 ~ 17.935)	0.615576		4.765 (0.783 ~ 28.991)	0.0901104
M00575	arabinose	PD	2.068 (0.477 ~ 8.963)	0.267349		1.0034 (0.9416 ~ 1.0694)	0.903611		2.100 (0.896 ~ 4.925)	0.0878449		2.233 (1.107 ~ 4.502)	0.0247922
M00584	mannose	PD	6.423 (1.187 ~ 34.754)	0.03214		0.9822 (0.9511 ~ 1.0142)	0.260083		3.623 (1.565 ~ 8.386)	0.00264937		2.813 (1.459 ~ 5.422)	0.00200798
M01123	inosine	PD	0.815 (0.621 ~ 1.070)	0.126239		1.0035 (0.9745 ~ 1.0333)	0.79949		0.825 (0.670 ~ 1.016)	0.0702701		0.833 (0.710 ~ 0.978)	0.0252116
M01336	palmitate (16:0)	PD	0.072 (0.007 ~ 0.710)	0.0242992		1.0202 (0.9959 ~ 1.0452)	0.104399		0.462 (0.139 ~ 1.538)	0.208094		0.405 (0.168 ~ 0.975)	0.0437297
M01358	stearate (18:0)	PD	0.422 (0.076 ~ 2.358)	0.326019		1.0015 (0.9836 ~ 1.0197)	0.871038		0.700 (0.258 ~ 1.902)	0.484472		0.496 (0.246 ~ 1.001)	0.0504635
M01564	citrate	PD	0.104 (0.013 ~ 0.845)	0.0349539		1.0171 (0.9957 ~ 1.0389)	0.115394		0.256 (0.092 ~ 0.713)	0.00914622		0.488 (0.242 ~ 0.986)	0.0456721
M01640	ascorbate (Vitamin C)	PD	0.793 (0.600 ~ 1.050)	0.0968485		1.0078 (0.9803 ~ 1.0361)	0.549908		0.880 (0.715 ~ 1.082)	0.226195		0.845 (0.726 ~ 0.984)	0.030139
M01645	laurate (12:0)	PD	0.348 (0.067 ~ 1.810)	0.209675		1.0039 (0.9859 ~ 1.0223)	0.67181		0.390 (0.140 ~ 1.088)	0.0720834		0.469 (0.236 ~ 0.935)	0.0315252
M02342	serotonin (5HT)	PD	0.593 (0.139 ~ 2.529)	0.452225		0.9946 (0.9629 ~ 1.0273)	0.724587		0.441 (0.196 ~ 0.995)	0.0486042		0.487 (0.269 ~ 0.883)	0.0178616
M15749	3-phenylpropionate (hydrocinnamate)	PD	2.120 (0.988 ~ 4.548)	0.0532199		0.9891 (0.9632 ~ 1.0156)	0.391792		1.790 (1.015 ~ 3.157)	0.0443752		1.661 (1.098 ~ 2.510)	0.01616
M19324	1-stearoylglycerophosphoinositol	PD	0.432 (0.134 ~ 1.399)	0.125827		1.0117 (0.9573 ~ 1.0691)	0.61204		0.603 (0.286 ~ 1.275)	0.185885		0.512 (0.291 ~ 0.901)	0.0202441
M21188	1-stearoylglycerol (1-monostearin)	PD	3.421 (0.741 ~ 15.800)	0.110126		0.9907 (0.9654 ~ 1.0166)	0.461808		2.642 (1.158 ~ 6.028)	0.020963		2.092 (1.180 ~ 3.709)	0.0115359
M27728	glycerol 2-phosphate	PD	2.424 (0.877 ~ 6.697)	0.0877336		0.9925 (0.9745 ~ 1.0109)	0.4212		1.808 (0.896 ~ 3.648)	0.098467		1.698 (1.034 ~ 2.790)	0.0366037
M32709	X-03056--N-[3-(2-Oxopyrrolidin-1-yl)propyl]acetamide	PD	0.856 (0.380 ~ 1.928)	0.70018		0.9913 (0.9741 ~ 1.0087)	0.315232		0.679 (0.388 ~ 1.188)	0.174548		0.591 (0.396 ~ 0.883)	0.0103288
M33228	1-arachidonoylglycerophosphocholine	PD	1.141 (0.468 ~ 2.782)	0.760879		0.9844 (0.9654 ~ 1.0038)	0.108498		0.850 (0.479 ~ 1.506)	0.576764		0.632 (0.391 ~ 1.021)	0.060583
M34365	3-(cystein-S-yl)acetaminophen	PD	0.939 (0.810 ~ 1.090)	0.40287		1.0019 (0.9755 ~ 1.0290)	0.887776		0.957 (0.904 ~ 1.012)	0.122267		0.949 (0.911 ~ 0.988)	0.011918
M34420	bradykinin, des-arg(9)	PD	0.864 (0.662 ~ 1.129)	0.280284		0.9978 (0.9760 ~ 1.0199)	0.839511		0.888 (0.755 ~ 1.046)	0.15434		0.845 (0.751 ~ 0.951)	0.0050794
M35127	pro-hydroxy-pro	PD	0.586 (0.034 ~ 10.024)	0.695393		0.9960 (0.9525 ~ 1.0414)	0.850426		0.348 (0.125 ~ 0.975)	0.0446534		0.472 (0.199 ~ 1.120)	0.0887116
M36230	X-14304--leucylalanine	PD	1.238 (0.550 ~ 2.786)	0.605413		1.0060 (0.9724 ~ 1.0408)	0.728817		1.444 (0.984 ~ 2.120)	0.0602845		1.432 (1.071 ~ 1.913)	0.0152977
M36738	gamma-glutamylglutamate	PD	0.775 (0.263 ~ 2.283)	0.60096		1.0398 (0.9797 ~ 1.1035)	0.168901		1.943 (1.120 ~ 3.372)	0.0181109		1.526 (0.959 ~ 2.428)	0.0745804
M01123	inosine	MS	1.085 (0.581 ~ 2.025)	0.774627		0.9791 (0.9331 ~ 1.0273)	0.345608		0.787 (0.617 ~ 1.004)	0.0539856		0.843 (0.693 ~ 1.025)	0.0873421
M01299	tyrosine	MS	0.070 (0.003 ~ 1.453)	0.0855879		1.0380 (1.0086 ~ 1.0684)	0.0110278		2.941 (0.940 ~ 9.196)	0.0637062		3.320 (1.515 ~ 7.277)	0.00272134
M01712	cortisol	MS	1.133 (0.285 ~ 4.504)	0.846129		1.0122 (0.9819 ~ 1.0434)	0.398003		1.688 (0.798 ~ 3.572)	0.170595		1.915 (1.051 ~ 3.491)	0.033895
M15122	glycerol	MS	0.534 (0.069 ~ 4.126)	0.547178		0.9985 (0.9657 ~ 1.0324)	0.928515		0.509 (0.209 ~ 1.239)	0.136726		0.498 (0.257 ~ 0.966)	0.0391096
M17805	dihomo-linoleate (20:2n6)	MS	5.789 (0.683 ~ 49.074)	0.0947565		0.9776 (0.9353 ~ 1.0218)	0.271896		2.919 (1.255 ~ 6.785)	0.0128326		2.124 (1.181 ~ 3.821)	0.0119376
M31591	androsterone sulfate	MS	0.801 (0.640 ~ 1.003)	0.053614		1.0049 (0.9915 ~ 1.0185)	0.475178		0.860 (0.704 ~ 1.051)	0.139848		0.854 (0.746 ~ 0.977)	0.0216432
M32328	hexanoylcarnitine	MS	1.356 (0.771 ~ 2.385)	0.279114		1.0009 (0.9836 ~ 1.0184)	0.921122		1.421 (0.926 ~ 2.181)	0.107504		1.394 (1.036 ~ 1.876)	0.0283447
M33084	ADSGEGDFXAEGGGVR	MS	0.969 (0.371 ~ 2.531)	0.940527		1.0233 (0.9834 ~ 1.0649)	0.212427		1.413 (0.899 ~ 2.219)	0.133613		1.624 (1.065 ~ 2.477)	0.0243789
M33230	1-palmitoleoylglycerophosphocholine	MS	12.477 (1.692 ~ 92.031)	0.0175381		0.9662 (0.9329 ~ 1.0007)	0.054149		1.838 (0.787 ~ 4.294)	0.159741		1.985 (1.045 ~ 3.771)	0.0361374
M33801	ADpSGEGDFXAEGGGVR	MS	1.005 (0.319 ~ 3.165)	0.992114		0.9738 (0.9252 ~ 1.0251)	0.252673		0.504 (0.313 ~ 0.812)	0.00482079		0.573 (0.396 ~ 0.827)	0.00295762
M33936	octanoylcarnitine	MS	1.148 (0.626 ~ 2.105)	0.64096		1.0057 (0.9862 ~ 1.0256)	0.552079		1.333 (0.905 ~ 1.965)	0.145631		1.337 (0.979 ~ 1.826)	0.0673896
M33955	1-palmitoylglycerophosphocholine	MS	2.266 (0.220 ~ 23.383)	0.478347		1.0011 (0.9775 ~ 1.0253)	0.92562		2.008 (0.628 ~ 6.427)	0.240009		2.606 (1.185 ~ 5.730)	0.017236
M34035	linolenate [alpha or gamma; (18:3n3 or 6)]	MS	4.280 (0.138 ~ 132.465)	0.220789		1.0033 (0.9309 ~ 1.0813)	0.899386		5.078 (1.408 ~ 18.322)	0.0130612		5.006 (1.68 ~ 14.915)	0.00383332
M34407	isovalerylcarnitine	MS	3.294 (1.015 ~ 10.692)	0.0473829		0.9854 (0.9619 ~ 1.0096)	0.222201		2.528 (1.446 ~ 4.421)	0.00113882		1.755 (1.109 ~ 2.778)	0.0163795
M34420	bradykinin, des-arg(9)	MS	1.304 (0.960 ~ 1.772)	0.0888766		0.9893 (0.9677 ~ 1.0114)	0.341757		1.167 (0.967 ~ 1.409)	0.106828		1.143 (1.006 ~ 1.299)	0.0396061
M34456	gamma-glutamylisoleucine	MS	0.825 (0.253 ~ 2.695)	0.750541		0.9951 (0.9756 ~ 1.0151)	0.629489		0.702 (0.367 ~ 1.342)	0.284196		0.623 (0.391 ~ 0.991)	0.0458727
M35254	2-oleoylglycerophosphocholine	MS	3.739 (0.089 ~ 156.412)	0.488748		0.9707 (0.9220 ~ 1.0221)	0.259172		0.461 (0.170 ~ 1.252)	0.128769		0.460 (0.216 ~ 0.980)	0.0442802
M35257	2-linoleoylglycerophosphocholine	MS	1.664 (0.121 ~ 22.970)	0.686236		0.9790 (0.9344 ~ 1.0258)	0.349355		0.507 (0.217 ~ 1.186)	0.117037		0.540 (0.276 ~ 1.054)	0.0710653
M17807	X-18601	AD	0.996 (0.931 ~ 1.065)	0.904853		0.9989 (0.9967 ~ 1.0011)	0.318922		0.968 (0.926 ~ 1.012)	0.150369		0.966 (0.936 ~ 0.997)	0.0317809
M22481	X-08988	AD	1.028 (0.957 ~ 1.104)	0.444409		1.0007 (0.9995 ~ 1.0019)	0.267161		1.063 (0.987 ~ 1.145)	0.105305		1.062 (1.014 ~ 1.112)	0.010297
M32634	X-11317	AD	1.187 (0.964 ~ 1.461)	0.104461		0.9993 (0.9970 ~ 1.0015)	0.499898		1.124 (1.001 ~ 1.263)	0.0486272		1.115 (1.034 ~ 1.202)	0.00469467
M32753	X-09789	AD	0.94 (0.77 ~ 1.148)	0.515554		1.0007 (0.9927 ~ 1.0087)	0.858941		0.960 (0.912 ~ 1.011)	0.120428		0.954 (0.906 ~ 1.004)	0.068551
M32846	X-11529	AD	0.991 (0.973 ~ 1.009)	0.308765		0.9990 (0.9973 ~ 1.0007)	0.239211		0.986 (0.969 ~ 1.003)	0.100904		0.983 (0.971 ~ 0.995)	0.00663656
M33391	X-12040	AD	1.014 (1.001 ~ 1.026)	0.0358062		0.9983 (0.9954 ~ 1.0012)	0.237462		1.010 (1.000 ~ 1.021)	0.0602797		1.008 (1.000 ~ 1.016)	0.0394823
M33408	X-12056	AD	1.04 (0.989 ~ 1.093)	0.123411		0.9993 (0.9965 ~ 1.0022)	0.636907		1.033 (0.995 ~ 1.071)	0.0883652		1.030 (1.003 ~ 1.058)	0.0283217
M34245	X-12645	AD	1.092 (0.984 ~ 1.213)	0.092143		0.9985 (0.9955 ~ 1.0015)	0.293086		1.050 (0.986 ~ 1.119)	0.125778		1.042 (0.999 ~ 1.086)	0.054202
M34306	X-12696	AD	0.994 (0.953 ~ 1.038)	0.78713		0.9984 (0.9970 ~ 0.9999)	0.0404565		0.990 (0.957 ~ 1.025)	0.585704		0.964 (0.920 ~ 1.009)	0.111065
M34344	X-12734	AD	0.988 (0.95 ~ 1.027)	0.513112		0.9990 (0.9942 ~ 1.0037)	0.645281		0.991 (0.968 ~ 1.015)	0.472032		0.980 (0.957 ~ 1.004)	0.100864
M34513	X-12830	AD	0.966 (0.866 ~ 1.078)	0.505225		0.9998 (0.9953 ~ 1.0044)	0.927359		0.967 (0.919 ~ 1.017)	0.191737		0.961 (0.921 ~ 1.003)	0.0687724
M34533	X-12850	AD	0.961 (0.907 ~ 1.018)	0.162159		1.0003 (0.9976 ~ 1.0029)	0.839931		0.965 (0.925 ~ 1.006)	0.0958521		0.965 (0.936 ~ 0.995)	0.0232496
M35187	X-13429	AD	0.99 (0.942 ~ 1.041)	0.681311		0.9987 (0.9951 ~ 1.0023)	0.472909		0.972 (0.943 ~ 1.002)	0.0639164		0.975 (0.952 ~ 0.998)	0.0332468
M35464	X-13671	AD	1.064 (0.787 ~ 1.439)	0.663449		0.9970 (0.9925 ~ 1.0015)	0.177627		0.868 (0.766 ~ 0.983)	0.0259259		0.886 (0.794 ~ 0.988)	0.02911
M36553	X-14626	AD	0.957 (0.889 ~ 1.031)	0.235873		0.9999 (0.9980 ~ 1.0019)	0.954021		0.944 (0.889 ~ 1.002)	0.0561338		0.957 (0.915 ~ 1.000)	0.0521231
M19364	X-06246	ALS	0.872 (0.357 ~ 2.128)	0.750575		0.9947 (0.9776 ~ 1.0120)	0.524831		0.737 (0.413 ~ 1.315)	0.301477		0.686 (0.450 ~ 1.046)	0.079712
M19368	X-06267	ALS	1.832 (0.438 ~ 7.664)	0.407157		0.9785 (0.9562 ~ 1.0013)	0.0639184		0.487 (0.223 ~ 1.064)	0.0709882		0.505 (0.283 ~ 0.903)	0.0210948
M22649	X-09108	ALS	0.651 (0.069 ~ 6.164)	0.708547		0.9957 (0.9659 ~ 1.0265)	0.782965		0.669 (0.253 ~ 1.767)	0.417435		0.474 (0.225 ~ 0.997)	0.0491846
M32761	X-11444	ALS	2.483 (1.021 ~ 6.035)	0.0452907		0.9823 (0.9598 ~ 1.0054)	0.124628		1.295 (0.859 ~ 1.954)	0.217219		1.339 (0.948 ~ 1.892)	0.0977388
M32857	X-11540	ALS	1.454 (0.289 ~ 7.323)	0.591809		0.9742 (0.9205 ~ 1.0312)	0.303736		0.766 (0.500 ~ 1.175)	0.222512		0.699 (0.496 ~ 0.985)	0.0405953
M33507	X-12092	ALS	1.107 (0.993 ~ 1.234)	0.0662716		0.9997 (0.9920 ~ 1.0075)	0.948013		1.092 (0.986 ~ 1.211)	0.0926186		1.105 (1.023 ~ 1.193)	0.0112805
M33508	X-12093	ALS	1.012 (0.765 ~ 1.34)	0.927511		1.0120 (0.9944 ~ 1.0299)	0.169122		1.240 (1.030 ~ 1.492)	0.0227314		1.199 (1.039 ~ 1.383)	0.0129907
M33782	X-10346	ALS	1.341 (1.05 ~ 1.713)	0.0225992		0.9837 (0.9613 ~ 1.0067)	0.146652		1.213 (1.023 ~ 1.438)	0.0263711		1.174 (1.018 ~ 1.354)	0.0272906
M34221	X-12627	ALS	0.712 (0.19 ~ 2.662)	0.581772		1.0196 (0.9835 ~ 1.0571)	0.261258		1.361 (0.861 ~ 2.150)	0.186598		1.430 (1.013 ~ 2.018)	0.0419091
M34306	X-12696	ALS	0.756 (0.574 ~ 0.994)	0.045628		1.0010 (0.9917 ~ 1.0104)	0.82315		0.806 (0.626 ~ 1.039)	0.096179		0.758 (0.594 ~ 0.967)	0.0259794
M34761	X-13069	ALS	1.051 (0.364 ~ 3.035)	0.92655		0.9882 (0.9610 ~ 1.0161)	0.403378		0.793 (0.523 ~ 1.204)	0.276418		0.679 (0.496 ~ 0.931)	0.0160618
M36552	X-14625	ALS	1.457 (0.354 ~ 6.004)	0.597082		1.0038 (0.9875 ~ 1.0203)	0.645234		2.220 (0.912 ~ 5.406)	0.0789581		2.036 (1.081 ~ 3.835)	0.0277035
M27256	X-10500	FTD	20830.926 (20.335 ~ 21338718.446)	0.00637667		0.9273 (0.8672 ~ 0.9915)	0.028407		13.547 (0.815 ~ 225.229)	0.0691868		13.571 (1.611 ~ 114.292)	0.0164496
M30805	X-10810	FTD	2.105 (0.39 ~ 11.375)	0.359995		1.0108 (0.9619 ~ 1.0623)	0.648651		3.068 (0.772 ~ 12.196)	0.111451		2.819 (0.950 ~ 8.365)	0.0618402
M32802	X-11485	FTD	0.51 (0.011 ~ 22.853)	0.668554		1.0727 (0.9335 ~ 1.2327)	0.250741		3.443 (0.821 ~ 14.445)	0.0910796		3.241 (1.118 ~ 9.395)	0.0303263
M32808	X-11491	FTD	3.876 (0.908 ~ 16.541)	0.0652863		0.9680 (0.9114 ~ 1.0280)	0.268404		2.148 (0.984 ~ 4.690)	0.0548555		1.955 (1.113 ~ 3.434)	0.0196455
M32846	X-11529	FTD	1.683 (1.118 ~ 2.533)	0.014905		0.9943 (0.9596 ~ 1.0303)	0.743646		1.463 (1.050 ~ 2.038)	0.0243693		1.623 (1.253 ~ 2.103)	0.000248201
M32855	X-11538	FTD	3.677 (1.351 ~ 10.008)	0.0135445		0.9737 (0.9315 ~ 1.0177)	0.22229		2.724 (1.332 ~ 5.569)	0.00602343		2.297 (1.340 ~ 3.936)	0.00248493
M33163	X-11818	FTD	38.43 (1.714 ~ 861.743)	0.0242957		0.9737 (0.9230 ~ 1.0273)	0.313223		11.679 (1.842 ~ 74.028)	0.0090935		10.587 (2.758 ~ 40.631)	0.000584717
M33165	X-11820	FTD	0.579 (0.046 ~ 7.315)	0.641859		0.9847 (0.9144 ~ 1.0604)	0.651829		0.305 (0.081 ~ 1.145)	0.0785116		0.35 (0.120 ~ 1.015)	0.0532661
M33250	X-11905	FTD	1.486 (0.606 ~ 3.646)	0.386538		1.0106 (0.9631 ~ 1.0604)	0.66878		1.571 (0.772 ~ 3.196)	0.212973		1.791 (1.081 ~ 2.967)	0.0237512
M33389	X-12038	FTD	1.926 (0.002 ~ 1575.151)	0.84545		1.0108 (0.9488 ~ 1.0770)	0.734859		5.624 (0.913 ~ 34.644)	0.0626479		6.313 (1.688 ~ 23.605)	0.00617529
M33415	X-12063	FTD	1.343 (0.549 ~ 3.285)	0.518252		1.0174 (0.9739 ~ 1.0629)	0.439004		1.910 (0.981 ~ 3.718)	0.0569105		1.858 (1.171 ~ 2.946)	0.00847274
M34344	X-12734	FTD	0.689 (0.134 ~ 3.533)	0.613422		0.9928 (0.8730 ~ 1.1291)	0.90041		0.573 (0.308 ~ 1.068)	0.0796219		0.628 (0.395 ~ 0.997)	0.0484285
M35187	X-13429	FTD	2.127 (0.868 ~ 5.212)	0.0989454		1.0056 (0.9466 ~ 1.0683)	0.856751		2.299 (1.298 ~ 4.072)	0.00431486		2.334 (1.477 ~ 3.689)	0.000283399
M36553	X-14626	FTD	3.02 (0.435 ~ 20.966)	0.248063		0.9953 (0.9512 ~ 1.0414)	0.830547		2.649 (0.674 ~ 10.408)	0.162991		2.649 (0.968 ~ 7.253)	0.0579163
M16821	X-04498	PD	1.72 (0.342 ~ 8.659)	0.488591		1.0021 (0.9721 ~ 1.0331)	0.885532		1.429 (0.604 ~ 3.382)	0.416924		1.959 (1.049 ~ 3.657)	0.0347806
M22649	X-09108	PD	0.532 (0.026 ~ 10.882)	0.651251		0.9926 (0.9501 ~ 1.0370)	0.712851		0.386 (0.085 ~ 1.758)	0.218388		0.319 (0.102 ~ 0.999)	0.0497477
M32735	X-01911	PD	1.018 (0.409 ~ 2.536)	0.969072		1.0196 (0.9832 ~ 1.0574)	0.294845		1.376 (0.925 ~ 2.048)	0.115617		1.644 (1.220 ~ 2.216)	0.00107912
M33140	X-11795	PD	1.464 (0.08 ~ 26.939)	0.7706		1.0119 (0.9502 ~ 1.0777)	0.676104		2.720 (0.867 ~ 8.538)	0.0864296		2.544 (1.056 ~ 6.126)	0.0373607
M33165	X-11820	PD	1.54 (0.635 ~ 3.73)	0.311378		1.0006 (0.9705 ~ 1.0316)	0.969269		1.423 (0.863 ~ 2.346)	0.166667		1.600 (1.078 ~ 2.377)	0.0197877
M33192	X-11847	PD	1.738 (1.001 ~ 3.018)	0.0496746		0.9863 (0.9496 ~ 1.0243)	0.474415		1.551 (1.156 ~ 2.082)	0.00344433		1.457 (1.163 ~ 1.825)	0.00105579
M33380	X-12029	PD	2.133 (0.316 ~ 14.385)	0.42683		0.9797 (0.9590 ~ 1.0008)	0.0592296		0.894 (0.283 ~ 2.824)	0.849064		0.408 (0.173 ~ 0.962)	0.0404901
M33508	X-12093	PD	0.721 (0.492 ~ 1.056)	0.0927856		1.0094 (0.9857 ~ 1.0335)	0.440575		0.813 (0.640 ~ 1.033)	0.0896868		0.826 (0.687 ~ 0.993)	0.0418024
M33877	X-12435	PD	1.034 (0.925 ~ 1.157)	0.556991		1.0166 (0.9890 ~ 1.0449)	0.240616		1.076 (0.978 ~ 1.184)	0.131849		1.092 (1.021 ~ 1.169)	0.0100821
M34327	X-12717	PD	1.393 (0.385 ~ 5.047)	0.561658		1.0013 (0.9073 ~ 1.1049)	0.97678		1.604 (1.158 ~ 2.221)	0.00445327		1.432 (1.120 ~ 1.831)	0.00420442
M34441	X-12771	PD	1.804 (0.486 ~ 6.699)	0.351384		0.9926 (0.9481 ~ 1.0391)	0.732637		1.562 (0.901 ~ 2.708)	0.112233		1.530 (0.973 ~ 2.407)	0.0654909
M36585	X-14658	PD	2.504 (0.438 ~ 14.326)	0.264271		0.9421 (0.8757 ~ 1.0135)	0.0978486		0.482 (0.259 ~ 0.896)	0.0211532		0.648 (0.360 ~ 1.169)	0.149892
M36673	X-14745	PD	0.38 (0.002 ~ 84.508)	0.700934		1.0409 (0.9278 ~ 1.1678)	0.459241		3.348 (1.282 ~ 8.745)	0.0136358		2.556 (1.111 ~ 5.879)	0.0272205
M19368	X-06267	MS	5.544 (0.28 ~ 109.636)	0.216918		0.9930 (0.9458 ~ 1.0425)	0.743087		3.237 (0.946 ~ 11.068)	0.0611732		3.988 (1.520 ~ 10.465)	0.00494287
M22649	X-09108	MS	0.183 (0.021 ~ 1.597)	0.109848		1.0128 (0.9800 ~ 1.0466)	0.405081		0.282 (0.079 ~ 1.004)	0.0507344		0.383 (0.154 ~ 0.953)	0.0391162
M32753	X-09789	MS	3.911 (0.627 ~ 24.388)	0.129213		0.9633 (0.9011 ~ 1.0297)	0.24249		1.419 (0.917 ~ 2.196)	0.116319		1.444 (1.060 ~ 1.968)	0.0197839
M33132	X-11787	MS	0.776 (0.309 ~ 1.949)	0.589616		0.9881 (0.9740 ~ 1.0023)	0.100463		0.544 (0.258 ~ 1.147)	0.109713		0.409 (0.243 ~ 0.687)	0.000727996
M33163	X-11818	MS	1 (0.302 ~ 3.309)	0.999533		0.9876 (0.9672 ~ 1.0085)	0.22598		0.574 (0.283 ~ 1.164)	0.123881		0.535 (0.322 ~ 0.887)	0.0153016
M33507	X-12092	MS	0.966 (0.84 ~ 1.111)	0.632654		0.9922 (0.9823 ~ 1.0022)	0.125655		0.955 (0.842 ~ 1.084)	0.477111		0.893 (0.810 ~ 0.986)	0.024579
M33610	X-12189	MS	1.047 (0.895 ~ 1.223)	0.551788		1.0060 (0.9845 ~ 1.0279)	0.574185		1.088 (0.972 ~ 1.217)	0.142761		1.086 (0.988 ~ 1.194)	0.0871448
M34062	X-12524	MS	1.146 (0.028 ~ 46.524)	0.93969		1.0091 (0.9690 ~ 1.0509)	0.646329		2.143 (0.537 ~ 8.546)	0.280077		2.622 (0.814 ~ 8.450)	0.106354
M34350	X-12740	MS	1.26 (0.791 ~ 2.007)	0.330904		1.0034 (0.9733 ~ 1.0345)	0.826334		1.337 (1.039 ~ 1.721)	0.0241825		1.328 (1.107 ~ 1.594)	0.00224275
M34912	X-13215	MS	0.868 (0.115 ~ 6.538)	0.887647		0.9943 (0.9736 ~ 1.0153)	0.581612		0.620 (0.281 ~ 1.367)	0.236259		0.495 (0.273 ~ 0.898)	0.0206936
M35464	X-13671	MS	3.698 (0.582 ~ 23.511)	0.165835		0.9904 (0.9636 ~ 1.0180)	0.491752		2.808 (1.084 ~ 7.275)	0.0334783		2.077 (1.014 ~ 4.255)	0.0458327

## Sheet: Table S6
Table S6. Estimated causal effects three metabolites on FTD by the multivariable Mendelian randomization analysis
Metabolite ID	Metabolite	Multivariable MR
		OR(95% CI)	P	F	P of Cochran’s Q
M32846	X-11529	0.726 (0.19 ~ 2.776)	0.64	19.56	0.317
M33178	2-methoxyacetaminophen sulfate	0.917 (0.875 ~ 0.96)	0.000231377	18.01	0.203
M35187	X-13429	1.799 (0.604 ~ 5.354)	0.292	19.71	0.907

## Sheet: Table S7
Table S7. Reverse associations for ALS/FTD on three metabolites
Metabolite ID	Metabolite	NDD	k0/k1	PVE	F	IVW			MR-Egger test			MR-Egger Intercept			Weight median test			Likelihood test
						OR(95% CI)	P		OR(95% CI)	P		beta(95% CI)	P		OR(95% CI)	P		OR(95% CI)	P
M33178	2-methoxyacetaminophen sulfate	ALS	69/9	0.00381	19.7 - 129.5	0.838 (0.722 ~ 0.972)	0.02		0.843 (0.522 ~ 1.362)	0.428		-0.0006 (-0.0469 ~ 0.0456)	0.975		0.893 (0.732 ~ 1.089)	0.264		0.838 (0.720 ~ 0.975)	0.022
M33178	2-methoxyacetaminophen sulfate	FTD	14/11	0.0271	29.7 - 40.8	1.050 (1.007 ~ 1.095)	0.021		0.670 (0.226 ~ 1.983)	0.469		0.1322 (-0.1866 ~ 0.451)	0.416		1.059 (1.006 ~ 1.116)	0.03		1.051 (1.007 ~ 1.096)	0.021
M32846	X-11529	FTD	14/11	0.0271	29.7 - 40.8	0.976 (0.961 ~ 0.991)	0.00213615		0.806 (0.54 ~ 1.202)	0.289634		0.0563 (-0.0611 ~ 0.1737)	0.347328		0.973 (0.953 ~ 0.993)	0.00919215		0.976 (0.96 ~ 0.991)	0.00230665
M35187	X-13429	FTD	14/11	0.0271	29.7 - 40.8	1.01 (0.995 ~ 1.025)	0.205772		0.802 (0.549 ~ 1.174)	0.256336		0.0675 (-0.0442 ~ 0.1792)	0.236021		1.011 (0.992 ~ 1.03)	0.260555		1.01 (0.995 ~ 1.025)	0.205199

## Sheet: Table S8
Table S8. Causal associations among three metabolites that were identified to be associated with ALS/FTD
Exposure	Outcome	IVW			MR-Egger test			MR-Egger Intercept			Weight median test			Likelihood test
		β (95% CI)	P		β (95% CI)	P		Intercept (95% CI)	P		β (95% CI)	P		β (95% CI)	P
M33178	M32846	0.012 (0.002 ~ 0.021)	0.012		-0.002 (-0.021 ~ 0.017)	0.84		0.004 (-0.001 ~ 0.008)	0.121		0.007 (-0.007 ~ 0.021)	0.325		0.012 (0.002 ~ 0.021)	0.017
M32846	M33178	0.004 (-0.109 ~ 0.117)	0.942		0.101 (-0.066 ~ 0.268)	0.268		-0.011 (-0.025 ~ 0.003)	0.122		0.062 (-0.090 ~ 0.214)	0.427		0.004 (-0.109 ~ 0.118)	0.941
M33178	M35187	0.006 (-0.003 ~ 0.016)	0.17		-0.002 (-0.021 ~ 0.017)	0.86		0.002 (-0.002 ~ 0.006)	0.332		0.018 (0.004 ~ 0.032)	0.012		0.006 (-0.004 ~ 0.016)	0.183
M35187	M33178	0.040 (-0.171 ~ 0.251)	0.709		0.185 (-0.235 ~ 0.604)	0.388		-0.011 (-0.038 ~ 0.017)	0.435		0.090 (-0.182 ~ 0.362)	0.517		0.041 (-0.170 ~ 0.253)	0.701
M32846	M35187	0.500 (0.463 ~ 0.537)	1.44e-153		0.482 (0.416 ~ 0.549)	3e-14		0.002 (-0.004 ~ 0.008)	0.451		0.486 (0.429 ~ 0.543)	3.52e-63		0.510 (0.465 ~ 0.556)	5.02e-107
M35187	M32846	1.596 (1.199 ~ 1.993)	3.3e-15		2.220 (1.453 ~ 2.986)	7.32e-05		-0.050 (-0.103 ~ 0.003)	0.061		1.649 (1.362 ~ 1.937)	2.62e-29		1.985 (1.385 ~ 2.585)	8.81e-11

## Sheet: Table S9
Table S9. Estimated genetic correlation between three metabolites and ALS/FTD using LDSC
Metabolite ID	Metabolite	NDD	rg	se	z	p
M33178	2-methoxyacetaminophen sulfate	ALS	-0.1072	0.1196	-0.8966	0.3699
M33178	2-methoxyacetaminophen sulfate	FTD	-0.1164	0.2155	-0.5402	0.589
M32846	X-11529	FTD	-0.1508	0.5178	-0.2913	0.7708
M35187	X-13429	FTD	-0.2438	0.5813	-0.4194	0.6749

## Sheet: Table S10
Table S10. Posterior probability of colocalisation for genetic variants for metabolites and ALS/FTD
Metabolite ID	Metabolite	NDD	IVs	nSNPs	PP.H0.abf	PP.H1.abf	PP.H2.abf	PP.H3.abf	PP.H4.abf
M33178	2-methoxyacetaminophen sulfate	ALS	rs10027220	119	0.982693	0.00838561	0.00825797	6.98738e-05	0.000593873
			rs10044695	129	0.9801	0.00964305	0.00943701	9.21217e-05	0.000727485
			rs10046447	175	0.975404	0.0118859	0.0117415	0.000142251	0.000825952
			rs10059799	88	0.984604	0.00738368	0.00732991	5.43395e-05	0.000628492
			rs10060532	116	0.982577	0.00844832	0.00828536	7.06197e-05	0.000618748
			rs10063245	86	0.985988	0.00675489	0.00667786	4.5215e-05	0.000534276
			rs10065331	144	0.979963	0.00970036	0.00957945	9.41616e-05	0.00066253
			rs10067430	66	0.988335	0.00557863	0.00557746	3.10039e-05	0.00047791
			rs10100951	90	0.985968	0.00675659	0.00671653	4.55136e-05	0.000513129
			rs10120414	85	0.986393	0.00657326	0.00648183	4.2685e-05	0.000509538
			rs10131251	66	0.988149	0.00569098	0.00563439	3.19561e-05	0.000493658
			rs10132956	143	0.979562	0.00993018	0.00971535	9.77931e-05	0.000695027
			rs10157030	122	0.981961	0.0087239	0.0086088	7.58519e-05	0.000629999
			rs10220710	163	0.977655	0.0108941	0.0105979	0.000117357	0.00073594
			rs10229296	96	0.984628	0.00743579	0.0073031	5.4574e-05	0.000578069
			rs10252504	112	0.983339	0.00803602	0.00797476	6.45852e-05	0.00058598
			rs10274397	43	0.992127	0.00377709	0.00374958	1.39424e-05	0.00033252
			rs10276616	236	0.971083	0.0140365	0.013827	0.000199006	0.000854399
			rs1038697	192	0.97451	0.0123141	0.0122071	0.000153435	0.000815512
			rs10415374	43	0.992116	0.00378735	0.00374966	1.39808e-05	0.000333347
			rs10447967	82	0.987019	0.00625677	0.00620471	3.88512e-05	0.000480869
			rs10471169	109	0.983343	0.00804091	0.00795206	6.44256e-05	0.000599284
			rs10475669	89	0.985259	0.00710421	0.00701487	5.00085e-05	0.000572233
			rs10483854	43	0.992172	0.00375365	0.00373135	1.37877e-05	0.000328981
			rs10486289	120	0.980705	0.00926625	0.00921366	8.63269e-05	0.000728926
			rs10488089	82	0.985514	0.00698357	0.00685735	4.7996e-05	0.000596677
			rs10494913	137	0.979496	0.00991391	0.0097663	9.81233e-05	0.000725677
			rs10495116	139	0.979166	0.0100278	0.00996428	0.000101305	0.000741
			rs1055375	65	0.988898	0.00532512	0.00530805	2.81426e-05	0.000440707
			rs10741472	35	0.993606	0.00306558	0.00305032	9.14186e-06	0.000269322
			rs10776859	85	0.986258	0.00665476	0.00652317	4.34947e-05	0.000520255
			rs10783298	37	0.993288	0.00322125	0.00319946	1.0095e-05	0.000280885
			rs10805325	154	0.978348	0.0104656	0.0103523	0.000110016	0.000724314
			rs10830676	89	0.984721	0.00735045	0.00726466	5.36166e-05	0.000610522
			rs10841927	100	0.984272	0.00760298	0.0074866	5.72489e-05	0.000581137
			rs10842538	96	0.984591	0.00743833	0.00733535	5.48367e-05	0.000580003
			rs10864476	79	0.987303	0.00612063	0.00606125	3.70981e-05	0.000477663
			rs10917221	101	0.984194	0.00761376	0.00755365	5.78549e-05	0.000580415
			rs10922741	55	0.989964	0.00482034	0.00476918	2.27986e-05	0.000423464
			rs10934820	50	0.990748	0.00442682	0.00441076	1.93133e-05	0.000394668
			rs10961091	139	0.980391	0.00952526	0.00933604	9.00491e-05	0.000657785
			rs10961171	174	0.975565	0.0117869	0.0116899	0.000140421	0.000818108
			rs10973779	146	0.979093	0.0101343	0.00995962	0.000102378	0.000710865
			rs10994406	125	0.98175	0.00876834	0.00877383	7.77322e-05	0.000629707
			rs11004576	88	0.985834	0.0068088	0.00677809	4.62808e-05	0.000533068
			rs11013791	127	0.980721	0.00927335	0.00922584	8.65433e-05	0.000692844
			rs11019667	159	0.978334	0.010547	0.0103024	0.00011036	0.000705787
			rs11032476	85	0.986456	0.0065637	0.00643238	4.22947e-05	0.000505188
			rs11038541	149	0.978352	0.0105434	0.0102451	0.000109659	0.000749385
			rs11041611	174	0.975702	0.0117978	0.0115476	0.000138814	0.000813912
			rs11057970	70	0.988392	0.00560808	0.00552036	3.08736e-05	0.000448669
			rs11067315	81	0.986685	0.00642296	0.00633906	4.07531e-05	0.000511798
			rs11112162	177	0.975746	0.0118491	0.0114675	0.000138458	0.000799213
			rs11121715	36	0.993134	0.00330993	0.00324428	1.05116e-05	0.000300957
			rs11183923	142	0.979179	0.0100754	0.00992329	0.000101385	0.000721451
			rs11198080	133	0.980307	0.0095232	0.00938945	9.05236e-05	0.000690251
			rs11202938	168	0.976992	0.0111587	0.0109698	0.000124538	0.000754638
			rs11215605	153	0.97859	0.010349	0.010238	0.000107555	0.000715914
			rs11228559	98	0.984979	0.00726127	0.00716641	5.22893e-05	0.000541483
			rs11256010	167	0.976851	0.0111768	0.0110815	0.000126026	0.000764922
			rs11257897	146	0.979274	0.0100468	0.00987696	0.000100631	0.000701412
			rs11608731	102	0.983651	0.0078829	0.00779024	6.18164e-05	0.000613903
			rs11613732	73	0.987596	0.00600473	0.00587247	3.52142e-05	0.0004913
			rs11620793	110	0.983352	0.00811191	0.00787813	6.43951e-05	0.000593527
			rs11664692	169	0.977414	0.0109432	0.0108014	0.000120212	0.000720978
			rs11672123	67	0.988559	0.00551351	0.00544304	2.9903e-05	0.000454605
			rs1169758	103	0.984064	0.00770355	0.00759378	5.8867e-05	0.000579381
			rs11698917	67	0.988805	0.0053678	0.00536305	2.8678e-05	0.000435764
			rs1174851	120	0.982169	0.00860452	0.00852673	7.40747e-05	0.000625792
			rs11753364	162	0.976892	0.0110965	0.0110956	0.000125245	0.000790721
			rs11753418	140	0.980492	0.00941937	0.00935415	8.92184e-05	0.000644801
			rs11770198	78	0.987436	0.00605494	0.00599951	3.63154e-05	0.000473492
			rs11826948	167	0.976806	0.0112353	0.0110647	0.0001265	0.000767434
			rs11834053	61	0.989055	0.00522138	0.00524219	2.72202e-05	0.000454226
			rs11856508	63	0.989173	0.00519693	0.00517101	2.67356e-05	0.000431874
			rs11878031	77	0.986997	0.00623954	0.00621139	3.87539e-05	0.000512828
			rs11893311	70	0.988014	0.00576701	0.00570844	3.28426e-05	0.00047731
			rs11913572	164	0.976519	0.0113463	0.0112018	0.000129351	0.000803835
			rs11916772	116	0.983068	0.00816045	0.00812222	6.68397e-05	0.00058294
			rs11943366	74	0.987616	0.0059757	0.00589101	3.51617e-05	0.000482616
			rs11948317	63	0.98821	0.00567341	0.0055756	3.15011e-05	0.00050899
			rs11957930	115	0.982836	0.00829289	0.00819799	6.85679e-05	0.000604368
			rs11964805	94	0.983312	0.00806206	0.00787381	6.3868e-05	0.00068847
			rs12004144	170	0.977501	0.0109138	0.0107545	0.000119363	0.000711107
			rs12004211	99	0.984872	0.00730617	0.00722476	5.30519e-05	0.000544153
			rs12036516	120	0.981701	0.00882642	0.00873494	7.78759e-05	0.000659411
			rs12122792	96	0.984579	0.00744583	0.00733937	5.49227e-05	0.000580944
			rs12189492	75	0.986677	0.00642723	0.0063062	4.05293e-05	0.000549427
			rs1219976	88	0.985901	0.00678072	0.00674272	4.58446e-05	0.000529743
			rs1221526	47	0.991126	0.0042383	0.00423242	1.77132e-05	0.000385706
			rs12226635	186	0.975592	0.0118943	0.0116047	0.000140715	0.000768154
			rs12246360	84	0.98572	0.00690145	0.00676498	4.6798e-05	0.00056654
			rs12285787	157	0.977519	0.0108726	0.0107257	0.000118533	0.000764698
			rs12327061	97	0.983733	0.00779268	0.0077743	6.09454e-05	0.000639044
			rs12377744	112	0.983425	0.00798402	0.00794834	6.39504e-05	0.000578951
			rs12405026	81	0.98648	0.00653924	0.00641256	4.19814e-05	0.00052664
			rs12416036	62	0.989014	0.00526816	0.00523972	2.74599e-05	0.000450413
			rs12426085	70	0.988199	0.00568736	0.00561836	3.1872e-05	0.000463209
			rs12443497	46	0.991586	0.00402858	0.00401442	1.59545e-05	0.000355189
			rs12512668	114	0.981857	0.00881167	0.00857446	7.62709e-05	0.000680572
			rs12514485	97	0.985052	0.00721475	0.00713985	5.1752e-05	0.000541902
			rs12583363	139	0.978029	0.0105292	0.0105033	0.00011225	0.00082608
			rs12590150	107	0.982524	0.00842248	0.00831302	7.05921e-05	0.000669499
			rs12599655	223	0.97246	0.0134947	0.013048	0.000180248	0.000817287
			rs12600115	220	0.970346	0.0144743	0.0140067	0.000207968	0.000964875
			rs12607891	75	0.987276	0.00613862	0.0060445	3.70793e-05	0.000503839
			rs12665113	163	0.978484	0.010394	0.010335	0.000109107	0.000677436
			rs12679602	78	0.986635	0.00641822	0.00637335	4.09268e-05	0.00053286
			rs12758010	122	0.979801	0.00974003	0.00957813	9.44278e-05	0.000786855
			rs12777389	216	0.972145	0.0134966	0.0133115	0.000183945	0.000863146
			rs12857335	70	0.988719	0.00542181	0.00540428	2.921e-05	0.000425245
			rs12867467	130	0.982008	0.00870698	0.00861888	7.58288e-05	0.000590532
			rs12950011	134	0.98059	0.00948951	0.00916815	8.80588e-05	0.000664577
			rs12959082	93	0.984906	0.00727339	0.00719407	5.25533e-05	0.00057391
			rs13061003	51	0.990366	0.00455893	0.00463535	2.09194e-05	0.000418433
			rs13326335	39	0.992828	0.00343681	0.00341978	1.15338e-05	0.00030423
			rs13329052	42	0.99228	0.00369685	0.00368277	1.33935e-05	0.000327076
			rs13337056	153	0.978897	0.0102603	0.0100434	0.000104574	0.000694352
			rs13385838	18	0.996459	0.00169034	0.00168886	2.7057e-06	0.000159195
			rs13405125	111	0.984056	0.00770604	0.00763755	5.92674e-05	0.000541501
			rs13410411	137	0.978895	0.0102102	0.0100167	0.000103704	0.00077463
			rs1352545	126	0.981551	0.00903029	0.00870032	7.94041e-05	0.000639078
			rs1355540	154	0.976936	0.0112137	0.010905	0.000124351	0.000821132
			rs1358551	91	0.985659	0.00690547	0.0068584	4.75196e-05	0.000529923
			rs1360391	113	0.98322	0.0081121	0.00801375	6.55292e-05	0.000588566
			rs1368009	104	0.983833	0.00783598	0.00768081	6.05864e-05	0.000589352
			rs1371599	100	0.984997	0.00724442	0.00717643	5.22508e-05	0.0005302
			rs1398759	160	0.976736	0.0112546	0.0110778	0.000126841	0.000804727
			rs1444113	136	0.980768	0.00928394	0.00921701	8.66039e-05	0.000644173
			rs1468284	97	0.983789	0.00782756	0.00768661	6.05226e-05	0.000636255
			rs1472170	48	0.991584	0.00404239	0.00401527	1.60272e-05	0.000341869
			rs1472292	96	0.984283	0.00757041	0.00748688	5.69813e-05	0.000602551
			rs1473864	173	0.975966	0.0116012	0.0115019	0.000135927	0.000794742
			rs1510969	65	0.988514	0.00551493	0.00547053	3.00497e-05	0.000470445
			rs1513215	108	0.982906	0.00823786	0.00815364	6.77021e-05	0.000634534
			rs1516626	126	0.981949	0.00873305	0.00862929	7.61328e-05	0.000612583
			rs1535938	192	0.973649	0.0127665	0.012555	0.000163755	0.000865977
			rs154554	35	0.993503	0.00312075	0.00308928	9.42635e-06	0.000277557
			rs1585145	107	0.983343	0.00805403	0.00792752	6.43193e-05	0.000610678
			rs1609916	118	0.982283	0.00860704	0.00840584	7.30235e-05	0.000630809
			rs1636949	99	0.983149	0.00818645	0.00792839	6.53474e-05	0.000670397
			rs1645773	55	0.990267	0.00466184	0.00465085	2.14963e-05	0.000398354
			rs1676300	87	0.985834	0.00682877	0.00675145	4.62272e-05	0.000539412
			rs16827187	49	0.990688	0.00445867	0.00442623	1.95134e-05	0.000407257
			rs16834028	188	0.975141	0.0120617	0.0118615	0.000145928	0.00078932
			rs16837093	168	0.974843	0.012303	0.0118055	0.000148092	0.000900118
			rs16849237	86	0.986077	0.00669797	0.00665176	4.46537e-05	0.000528655
			rs16854290	95	0.985224	0.00712989	0.00705665	5.05288e-05	0.00053896
			rs16854851	64	0.989119	0.00522205	0.00520117	2.70287e-05	0.000430847
			rs16855905	72	0.988072	0.00574247	0.00569245	3.26226e-05	0.000460719
			rs16856275	156	0.97756	0.0108392	0.0107107	0.000117989	0.000772282
			rs16856874	158	0.978181	0.010542	0.0104472	0.000111873	0.00071806
			rs16859878	77	0.987188	0.00615759	0.00611972	3.76751e-05	0.000496628
			rs16863208	57	0.989945	0.00481854	0.00480255	2.29656e-05	0.000410728
			rs16864792	194	0.971987	0.0136981	0.0131627	0.000184533	0.000967898
			rs16869484	148	0.979166	0.010137	0.00989754	0.000101768	0.000697891
			rs16877016	72	0.987532	0.00597466	0.00595628	3.55346e-05	0.000501495
			rs16881303	105	0.982977	0.00817993	0.00812792	6.69893e-05	0.000647872
			rs16890511	98	0.984362	0.00750773	0.00748895	5.65334e-05	0.000584815
			rs16894341	81	0.987006	0.00625536	0.00621089	3.88744e-05	0.00048843
			rs16894361	137	0.980109	0.00960718	0.00950259	9.24576e-05	0.000688271
			rs16901935	160	0.976798	0.011201	0.0110687	0.000126119	0.000806326
			rs16909586	95	0.984933	0.00727118	0.00718398	5.24754e-05	0.000559684
			rs16913175	97	0.983952	0.00774662	0.00761882	5.93599e-05	0.000622784
			rs16926097	133	0.979319	0.00998715	0.00983453	9.95335e-05	0.000759566
			rs16927166	56	0.990426	0.00460497	0.00456839	2.08605e-05	0.000380217
			rs16936983	140	0.979702	0.00978912	0.00971378	9.63607e-05	0.000698761
			rs16943260	108	0.983585	0.00794013	0.00782143	6.25484e-05	0.000591237
			rs16944662	152	0.978406	0.0104409	0.0103113	0.000109304	0.000732099
			rs16954769	177	0.97536	0.0118953	0.0117805	0.000142852	0.000821106
			rs16984282	169	0.975559	0.0118303	0.011626	0.00014014	0.000844645
			rs16992346	150	0.979629	0.00984468	0.00976734	9.7494e-05	0.000661806
			rs16997544	158	0.977237	0.0110582	0.0108029	0.000121463	0.00078007
			rs17020850	103	0.982757	0.00830775	0.00818892	6.85475e-05	0.00067763
			rs17027182	62	0.98876	0.00538405	0.00535651	2.86966e-05	0.000471005
			rs17027472	88	0.986011	0.00674282	0.00667729	4.51391e-05	0.000523411
			rs17029741	43	0.992121	0.00378381	0.00374858	1.39636e-05	0.000332969
			rs17030263	76	0.98743	0.00605483	0.00599217	3.62568e-05	0.000486594
			rs17031781	161	0.977177	0.011077	0.0108531	0.000122257	0.000770577
			rs17053995	154	0.977349	0.0109013	0.0108406	0.000120127	0.00078916
			rs17061604	111	0.982028	0.00873767	0.00847287	7.47016e-05	0.000686361
			rs17068330	92	0.985353	0.00707362	0.00697583	4.95299e-05	0.000547922
			rs17076137	51	0.990876	0.00436976	0.0043579	1.88408e-05	0.000377523
			rs17079498	175	0.975395	0.0119417	0.0116949	0.000142354	0.000826076
			rs17085716	134	0.979273	0.00997081	0.00989641	0.000100004	0.00076001
			rs17088496	133	0.980382	0.00949382	0.0093485	8.98428e-05	0.000686175
			rs17091532	155	0.978243	0.0105223	0.0103995	0.000111136	0.000724149
			rs17093221	160	0.977327	0.0109917	0.0107941	0.000120632	0.000766474
			rs17094227	76	0.986298	0.00655366	0.00653358	4.2842e-05	0.000571682
			rs17098188	166	0.976196	0.0115334	0.0113216	0.000132945	0.00081558
			rs17098805	100	0.984956	0.00730964	0.00714511	5.24893e-05	0.000536558
			rs17100461	148	0.978963	0.0101632	0.0100568	0.000103692	0.000713637
			rs17108690	122	0.981025	0.00910708	0.00908718	8.36616e-05	0.000696623
			rs17108927	121	0.981924	0.00870318	0.00865886	7.61091e-05	0.000637707
			rs17118705	126	0.981208	0.00908021	0.00896672	8.2316e-05	0.000663145
			rs17119874	145	0.977948	0.0106462	0.0104967	0.000113475	0.000795382
			rs17126321	106	0.98326	0.00805665	0.00799541	6.48899e-05	0.000623004
			rs17140558	114	0.982616	0.00841502	0.0082718	7.02121e-05	0.000626782
			rs17149000	176	0.976188	0.0115123	0.0113955	0.000133618	0.000770729
			rs17154872	128	0.981061	0.00913245	0.00905808	8.36547e-05	0.000664719
			rs17157513	70	0.987422	0.00606808	0.00595025	3.60427e-05	0.000523848
			rs17164003	129	0.980815	0.00925647	0.00916828	8.58513e-05	0.000674541
			rs17167552	94	0.985075	0.00720781	0.00710945	5.14638e-05	0.000556162
			rs17168817	126	0.981843	0.00878429	0.00867697	7.70116e-05	0.000618999
			rs17172130	24	0.995239	0.00227469	0.00226518	4.96144e-06	0.000215809
			rs17181818	61	0.989787	0.00490146	0.00489004	2.38178e-05	0.000397835
			rs17208695	84	0.986167	0.00666014	0.00659723	4.40229e-05	0.000531932
			rs17263168	113	0.982185	0.00863112	0.0084496	7.35915e-05	0.000660888
			rs17291576	181	0.975664	0.011771	0.0116412	0.000139663	0.000784264
			rs17314070	62	0.98911	0.00523291	0.00518611	2.69936e-05	0.00044364
			rs17397601	202	0.974603	0.0123368	0.0121412	0.00015292	0.000766413
			rs17408309	88	0.985909	0.00677863	0.00673791	4.57982e-05	0.000528384
			rs17435401	70	0.987893	0.00571028	0.00587676	3.34824e-05	0.000486755
			rs17470657	129	0.980122	0.00954642	0.00951746	9.19783e-05	0.000721955
			rs17481016	53	0.99052	0.00455094	0.00451634	2.03578e-05	0.000392462
			rs17576178	210	0.97254	0.0133338	0.0130845	0.000178529	0.000863117
			rs17595169	151	0.979542	0.00988713	0.00981297	9.83893e-05	0.000659058
			rs17628684	73	0.987958	0.00578438	0.0057606	3.32644e-05	0.00046326
			rs17650707	150	0.978981	0.0101442	0.0100697	0.000103641	0.000701055
			rs17653246	145	0.979358	0.0100542	0.00979139	9.98225e-05	0.000696507
			rs17659760	104	0.983403	0.00798093	0.0079308	6.37419e-05	0.000621606
			rs17680579	106	0.983552	0.00792761	0.00785685	6.27271e-05	0.000600476
			rs17693330	131	0.980936	0.00922555	0.00909744	8.49037e-05	0.000656275
			rs17721790	107	0.983333	0.00804689	0.00794304	6.43877e-05	0.000612379
			rs17782421	118	0.981298	0.00907567	0.00884247	8.10777e-05	0.000703161
			rs17810433	129	0.981226	0.00902282	0.00901969	8.22908e-05	0.000649393
			rs17825562	92	0.985343	0.00706677	0.00699344	4.96091e-05	0.000547147
			rs17829368	86	0.986434	0.00653721	0.00648483	4.2474e-05	0.000501624
			rs17863803	229	0.970444	0.0143587	0.0140632	0.000207153	0.000926541
			rs1791280	125	0.981714	0.00892649	0.00864675	7.79885e-05	0.000634275
			rs1799453	153	0.979606	0.00987668	0.00977049	9.78597e-05	0.000649256
			rs1800777	132	0.980768	0.00930484	0.00917742	8.64054e-05	0.000663558
			rs1865660	115	0.980596	0.0093132	0.00923958	8.69887e-05	0.000764116
			rs1865893	106	0.983238	0.00810098	0.00797251	6.50629e-05	0.000623324
			rs1891251	146	0.978742	0.0102764	0.0101403	0.000105734	0.000735686
			rs1927455	143	0.979706	0.0097785	0.00973574	9.64894e-05	0.000683621
			rs1929543	90	0.985229	0.00710427	0.00704957	5.0266e-05	0.000566949
			rs2029619	82	0.986232	0.00663767	0.00654777	4.35298e-05	0.000538873
			rs2047682	53	0.990649	0.0044889	0.00446033	1.98288e-05	0.000382156
			rs2050260	26	0.994968	0.00240458	0.00239892	5.57445e-06	0.000223118
			rs2053450	164	0.977618	0.0108433	0.0106898	0.000117836	0.000730878
			rs2057276	169	0.976948	0.011146	0.0110303	0.000125094	0.00075067
			rs2064496	90	0.985386	0.00705659	0.00695017	4.92137e-05	0.000558138
			rs2113097	109	0.982114	0.00862741	0.00849379	7.3923e-05	0.000690899
			rs2121016	156	0.977352	0.010917	0.0108313	0.000120206	0.000779929
			rs2145526	159	0.977101	0.0110578	0.0109314	0.000122924	0.000786521
			rs2173225	139	0.980436	0.00948881	0.00932949	8.96357e-05	0.000656531
			rs2177959	117	0.982005	0.00865893	0.0086085	7.52539e-05	0.000652487
			rs2188978	116	0.982022	0.00878364	0.00846077	7.5018e-05	0.000658853
			rs2218123	116	0.981949	0.00871794	0.00859162	7.56127e-05	0.00066539
			rs2227580	55	0.990508	0.00454227	0.00454895	2.04806e-05	0.000379995
			rs2230944	78	0.986846	0.00636791	0.00622897	3.9677e-05	0.000517307
			rs2235380	93	0.984777	0.007365	0.00722152	5.34253e-05	0.000583423
			rs2236217	129	0.980153	0.00962015	0.00941603	9.1699e-05	0.000718759
			rs2241445	60	0.989589	0.00500667	0.00495991	2.46742e-05	0.000419697
			rs2249531	126	0.981921	0.00876746	0.00862212	7.63731e-05	0.000612769
			rs2250600	79	0.987	0.00625865	0.0062023	3.88294e-05	0.00049987
			rs2273617	89	0.985246	0.00711979	0.00701236	5.01022e-05	0.000572032
			rs2284767	108	0.9838	0.007827	0.00773855	6.09937e-05	0.000573363
			rs2299161	91	0.9854	0.00704729	0.00695311	4.91765e-05	0.000550115
			rs231966	133	0.979606	0.00983213	0.00972682	9.68878e-05	0.000738611
			rs2348445	134	0.977669	0.0106181	0.0107183	0.000115529	0.000878633
			rs2361394	85	0.986205	0.00664352	0.00658451	4.38332e-05	0.00052308
			rs2410660	219	0.97174	0.0137282	0.0134652	0.000189351	0.00087772
			rs2429980	65	0.987961	0.00577213	0.00571873	3.28964e-05	0.000515062
			rs247858	285	0.96737	0.0159709	0.0154891	0.000254805	0.000915103
			rs2647998	117	0.982001	0.00869425	0.00857632	7.52781e-05	0.00065326
			rs2760672	130	0.979699	0.00975568	0.00970156	9.58586e-05	0.000747942
			rs2797880	145	0.979224	0.0100604	0.00990475	0.00010105	0.000709401
			rs2802568	83	0.985757	0.00684991	0.00677769	4.65289e-05	0.000568468
			rs28505465	81	0.986482	0.00648901	0.00646098	4.19736e-05	0.000526243
			rs288438	79	0.987245	0.00615286	0.00608335	3.7432e-05	0.000481618
			rs2891717	13	0.997351	0.00126811	0.00125684	1.47508e-06	0.000122971
			rs2964846	106	0.981945	0.00869047	0.0085703	7.51306e-05	0.000718723
			rs2968779	132	0.979995	0.00962725	0.0095663	9.32593e-05	0.000717849
			rs3008254	129	0.981431	0.00897746	0.00887597	8.05559e-05	0.000635486
			rs3026502	102	0.9835	0.00797104	0.00784054	6.29198e-05	0.000625989
			rs305550	82	0.98579	0.00683255	0.00675846	4.62704e-05	0.000572693
			rs310907	105	0.982604	0.00837531	0.00827538	6.98608e-05	0.000675064
			rs3169950	56	0.990245	0.00470281	0.00463678	2.16267e-05	0.000394046
			rs3219080	92	0.985501	0.00700553	0.00690949	4.85815e-05	0.000535305
			rs323090	191	0.970932	0.0139994	0.0138157	0.000198147	0.00105485
			rs33469	162	0.977968	0.0107284	0.0104712	0.000114152	0.000718012
			rs35875280	160	0.978466	0.0104578	0.0102721	0.000109094	0.000694862
			rs368353	1	0.99979	0.000100032	9.98971e-05	0	9.99503e-06
			rs3760279	114	0.980825	0.00921066	0.00912545	8.49411e-05	0.000753458
			rs3763903	82	0.986592	0.00645173	0.00640226	4.13548e-05	0.000512224
			rs3777914	97	0.984814	0.00738943	0.00718599	5.33622e-05	0.000556952
			rs3780205	88	0.985983	0.00680793	0.00663921	4.53173e-05	0.000524524
			rs3782872	93	0.985528	0.00697024	0.00692375	4.84389e-05	0.000530028
			rs3785254	239	0.968384	0.0154332	0.0149319	0.000236958	0.00101351
			rs3805014	145	0.97945	0.00994687	0.00981063	9.89385e-05	0.00069401
			rs3811321	166	0.977812	0.0107563	0.010607	0.000115972	0.000708599
			rs3814168	110	0.983392	0.00800624	0.00794699	6.41094e-05	0.000590608
			rs3821143	97	0.984125	0.00762305	0.00758442	5.81401e-05	0.00060894
			rs3889670	117	0.982368	0.00855955	0.0083719	7.23179e-05	0.000627836
			rs3900763	128	0.980488	0.00938084	0.00934044	8.86625e-05	0.000702412
			rs4060121	127	0.981298	0.00905649	0.00891228	8.16007e-05	0.000651526
			rs4129747	67	0.988916	0.00533499	0.00529327	2.81287e-05	0.000427351
			rs4130875	88	0.985835	0.00683146	0.00675361	4.62663e-05	0.00053366
			rs421380	100	0.984322	0.00755376	0.00748973	5.68992e-05	0.000577533
			rs4242763	142	0.979648	0.00984367	0.00971794	9.69539e-05	0.000693585
			rs42441	113	0.982328	0.00848452	0.00846556	7.24688e-05	0.000649612
			rs4244278	83	0.985852	0.00680937	0.00673138	4.59333e-05	0.000561033
			rs4246023	165	0.976806	0.0112286	0.0110618	0.00012638	0.000777598
			rs4294438	67	0.988135	0.00573209	0.00561287	3.20719e-05	0.000487855
			rs4333550	97	0.984243	0.0075955	0.00750298	5.72997e-05	0.000601527
			rs436268	189	0.9734	0.0129333	0.0126073	0.000166618	0.000892446
			rs4427044	133	0.980455	0.00948373	0.00929221	8.92018e-05	0.000679791
			rs4441723	62	0.989263	0.0051706	0.00510826	2.6268e-05	0.000431475
			rs4453029	60	0.989608	0.00502372	0.00492584	2.45882e-05	0.000417661
			rs4507748	99	0.984546	0.0074471	0.00738332	5.52795e-05	0.000567932
			rs4545881	85	0.986568	0.00647163	0.00642134	4.16254e-05	0.000496926
			rs4589673	23	0.995511	0.0021494	0.00213428	4.40767e-06	0.000200428
			rs4599300	103	0.98395	0.00772714	0.00767482	5.96836e-05	0.000588066
			rs4602520	197	0.972904	0.0130599	0.0129753	0.000173288	0.000887653
			rs4652417	124	0.981263	0.00904886	0.00893718	8.1746e-05	0.000669652
			rs465409	123	0.979711	0.00974629	0.00966214	9.53353e-05	0.000784891
			rs4661096	30	0.994437	0.00266288	0.00265598	6.87485e-06	0.000237278
			rs4670236	161	0.978091	0.0106329	0.0104504	0.000112895	0.000713219
			rs4674097	83	0.986493	0.00651702	0.00643323	4.1985e-05	0.000514506
			rs4678695	85	0.985755	0.00684839	0.00679311	4.66374e-05	0.000556766
			rs4748887	76	0.986967	0.00631507	0.00615573	3.88635e-05	0.000523712
			rs4766348	145	0.979482	0.00994832	0.00978066	9.86489e-05	0.000690493
			rs4805151	167	0.977208	0.0110962	0.010832	0.000122256	0.000741445
			rs4810592	118	0.981839	0.00883584	0.00858888	7.66338e-05	0.000660012
			rs4812754	97	0.984472	0.00749489	0.00739328	5.5702e-05	0.000583827
			rs4843884	178	0.976136	0.0115657	0.011399	0.000134296	0.000764782
			rs4847371	95	0.984638	0.00739393	0.00733173	5.44744e-05	0.000581613
			rs4918228	104	0.983489	0.0079044	0.00792783	6.31011e-05	0.000615687
			rs4928021	144	0.979803	0.00974462	0.00968348	9.56336e-05	0.00067337
			rs4942047	78	0.986961	0.00629187	0.00619925	3.90116e-05	0.000508623
			rs4961483	227	0.972543	0.0133901	0.0130867	0.000179378	0.00080038
			rs4964992	86	0.985713	0.00693629	0.00674957	4.69411e-05	0.000554541
			rs4965131	79	0.986929	0.00628116	0.0062465	3.92505e-05	0.000504427
			rs4982501	128	0.981431	0.00900309	0.00884712	8.05198e-05	0.000638682
			rs521361	116	0.982058	0.00866796	0.00854273	7.4744e-05	0.000656958
			rs545142	117	0.978092	0.0107042	0.0101435	0.000110061	0.000949814
			rs547344	79	0.98697	0.00628994	0.00619946	3.90069e-05	0.000502097
			rs560406	182	0.9761	0.0116072	0.0114055	0.000134876	0.000752139
			rs5747033	71	0.988143	0.00572979	0.00563367	3.22056e-05	0.000461531
			rs575136	191	0.974476	0.0123548	0.0121986	0.000153842	0.000816637
			rs588113	111	0.980894	0.00920052	0.00905405	8.41569e-05	0.000767697
			rs6001118	75	0.987165	0.00616471	0.00611996	3.77054e-05	0.000512899
			rs6006868	232	0.971386	0.0140287	0.0135331	0.000194585	0.000857649
			rs6040322	150	0.978979	0.0101918	0.0100258	0.000103675	0.000699758
			rs6041405	154	0.978088	0.0105564	0.0105029	0.000112616	0.000740512
			rs6056196	235	0.971544	0.0137781	0.0136433	0.000192643	0.000841612
			rs6115656	80	0.986672	0.00644971	0.00631894	4.0787e-05	0.000518873
			rs6122991	70	0.987998	0.00576778	0.00572206	3.29254e-05	0.000479116
			rs6136119	146	0.97973	0.00979265	0.00971183	9.64035e-05	0.000668655
			rs6137014	80	0.9871	0.00623692	0.00613651	3.82852e-05	0.000487821
			rs628495	105	0.982769	0.00829158	0.00820632	6.85716e-05	0.000664749
			rs630126	91	0.985637	0.00690852	0.0068747	4.76544e-05	0.000531649
			rs633810	105	0.984058	0.00769991	0.00761395	5.90072e-05	0.000569326
			rs6436032	56	0.990373	0.00462712	0.0045941	2.10797e-05	0.000384381
			rs6436102	19	0.996172	0.00183466	0.00181453	3.16593e-06	0.000175911
			rs6459477	104	0.983703	0.00788503	0.00774845	6.15068e-05	0.000602101
			rs6475096	171	0.975942	0.0117096	0.0114071	0.00013606	0.000805514
			rs6495823	83	0.985169	0.0071463	0.00701981	5.03062e-05	0.000614734
			rs6499642	109	0.983437	0.00799439	0.00790908	6.36973e-05	0.000595906
			rs6500125	123	0.98146	0.00900521	0.00879469	8.00345e-05	0.000659634
			rs6534458	111	0.982236	0.00861699	0.00840467	7.30634e-05	0.000669267
			rs653513	119	0.982334	0.00855535	0.00841825	7.26968e-05	0.000619376
			rs654974	67	0.988173	0.0056848	0.00562544	3.18778e-05	0.000484399
			rs6561867	66	0.988834	0.00536984	0.00532819	2.84951e-05	0.000439524
			rs6578873	129	0.98133	0.00900619	0.00894361	8.1441e-05	0.000639257
			rs6664636	100	0.984655	0.00741153	0.00732541	5.45852e-05	0.000553371
			rs6677918	110	0.983136	0.00814855	0.00804163	6.60438e-05	0.000607767
			rs6685155	87	0.985296	0.00706693	0.0070076	4.96813e-05	0.000579958
			rs6693659	81	0.986535	0.00649506	0.00640555	4.16498e-05	0.000522487
			rs6711230	130	0.980792	0.00930062	0.00914808	8.60759e-05	0.000673138
			rs6716565	48	0.991291	0.00418488	0.00414259	1.71239e-05	0.000364617
			rs6734884	158	0.976818	0.0112469	0.0109967	0.000125802	0.000812129
			rs674341	151	0.97697	0.0111234	0.0109496	0.000123835	0.000833246
			rs6750825	102	0.984177	0.00764242	0.00754381	5.8001e-05	0.000578991
			rs6798383	153	0.978832	0.0103384	0.0100281	0.00010522	0.000696056
			rs6813770	88	0.98505	0.00724272	0.00706016	5.13153e-05	0.000595513
			rs6851302	114	0.980678	0.00942359	0.00904308	8.61284e-05	0.000768943
			rs6873660	69	0.988098	0.00573886	0.00565237	3.23509e-05	0.000478014
			rs6880427	82	0.986432	0.00650793	0.00649229	4.2307e-05	0.000525491
			rs6903934	102	0.984036	0.00770478	0.00761157	5.90087e-05	0.000588188
			rs6915443	91	0.985805	0.00684166	0.00678648	4.65794e-05	0.000519918
			rs6952699	85	0.985916	0.0067845	0.00670834	4.56175e-05	0.000545394
			rs696686	101	0.984125	0.00769613	0.00753281	5.83206e-05	0.000588134
			rs6987404	109	0.983055	0.00815389	0.00810365	6.65942e-05	0.000621137
			rs7015641	115	0.983026	0.00821103	0.0081057	6.71148e-05	0.000590583
			rs7028666	116	0.981405	0.00897852	0.00883422	8.0119e-05	0.000702048
			rs7030552	114	0.982097	0.00865207	0.00851385	7.43428e-05	0.000662425
			rs7036654	69	0.988553	0.00553228	0.00544096	3.00056e-05	0.000443796
			rs7089115	113	0.982648	0.00837404	0.00827922	6.9926e-05	0.000628759
			rs7118023	8	0.998345	0.000789041	0.000787239	5.44414e-07	7.77794e-05
			rs7121134	115	0.983286	0.00807505	0.00799935	6.51191e-05	0.000574057
			rs712404	153	0.977812	0.0107358	0.0105694	0.000115278	0.000767739
			rs7128387	52	0.990808	0.00441688	0.00437942	1.91466e-05	0.000376226
			rs7137664	53	0.990154	0.00471279	0.00468937	2.18982e-05	0.000421583
			rs7152113	69	0.988243	0.00564056	0.00561797	3.15991e-05	0.000466382
			rs7187710	54	0.990595	0.00452222	0.00448258	2.0084e-05	0.000379682
			rs7207538	81	0.986777	0.00637201	0.00630575	4.02137e-05	0.00050501
			rs7276997	135	0.980111	0.00966454	0.00943704	9.23608e-05	0.000694653
			rs7282706	89	0.986019	0.00671009	0.00670877	4.51382e-05	0.000516618
			rs7295522	64	0.989258	0.00516662	0.00512918	2.63685e-05	0.000419777
			rs7305247	136	0.980242	0.00954177	0.00944345	9.1242e-05	0.00068145
			rs7315726	134	0.97961	0.00987197	0.0096891	9.69094e-05	0.000732038
			rs733501	160	0.9779	0.0107397	0.0105171	0.000114775	0.000728319
			rs734054	114	0.982088	0.00863247	0.00854319	7.44322e-05	0.000661631
			rs7342699	132	0.980046	0.00965671	0.00949015	9.27948e-05	0.000714724
			rs7529480	86	0.986042	0.00676104	0.00662012	4.48604e-05	0.000532041
			rs7533400	95	0.984471	0.00748802	0.00739096	5.56223e-05	0.000594329
			rs7565704	103	0.984199	0.00764253	0.00753106	5.79113e-05	0.000569066
			rs757128	143	0.979087	0.0101392	0.00994559	0.000102268	0.00072616
			rs7572993	160	0.977587	0.0108458	0.0107018	0.000117983	0.000747837
			rs7599592	135	0.979265	0.0100093	0.00987037	0.000100132	0.0007551
			rs7622961	111	0.983134	0.00813783	0.00805759	6.60919e-05	0.000604316
			rs7637257	76	0.987628	0.00596071	0.00590405	3.51616e-05	0.000471603
			rs7643344	187	0.976307	0.0115004	0.0113394	0.000132851	0.000720785
			rs7667914	36	0.993157	0.00327431	0.00325943	1.04471e-05	0.000298804
			rs7674006	107	0.983201	0.00808782	0.00802503	6.5393e-05	0.000620848
			rs7675814	130	0.979769	0.00977908	0.00961049	9.51759e-05	0.000746348
			rs7701941	142	0.979046	0.0101452	0.00997111	0.000102589	0.000734875
			rs7722027	85	0.98557	0.0069374	0.00687387	4.78136e-05	0.000571399
			rs7722181	101	0.983708	0.00783924	0.00777495	6.13428e-05	0.000616426
			rs7746400	126	0.981018	0.00915732	0.00906464	8.39374e-05	0.000676573
			rs7755459	132	0.979829	0.00971489	0.00963132	9.47631e-05	0.000730329
			rs7760073	85	0.986489	0.00651144	0.00645411	4.20978e-05	0.000503347
			rs7786633	187	0.976126	0.0115533	0.0114575	0.000134881	0.000728791
			rs7800783	191	0.974272	0.0124996	0.0122409	0.000156215	0.000831128
			rs7822943	155	0.977471	0.0108891	0.0107417	0.000118885	0.000779536
			rs7854415	144	0.97912	0.0100544	0.0100048	0.000102018	0.000718845
			rs7862319	133	0.980894	0.00928645	0.00908304	8.53406e-05	0.000651611
			rs7912365	123	0.981597	0.00890126	0.00877227	7.88977e-05	0.000650372
			rs7929278	104	0.981768	0.00875033	0.00866192	7.64586e-05	0.000743595
			rs7941283	44	0.991926	0.00387612	0.00384194	1.46716e-05	0.000341421
			rs794174	118	0.982164	0.00861748	0.00850881	7.402e-05	0.000636032
			rs7942841	193	0.975134	0.0121124	0.0118421	0.000146329	0.000765419
			rs7944027	160	0.979203	0.0100948	0.00995311	0.000101961	0.000647336
			rs7960522	91	0.985454	0.00703349	0.00691888	4.88372e-05	0.000544977
			rs7963305	72	0.988181	0.00570213	0.00563182	3.20448e-05	0.000452677
			rs7967567	113	0.983045	0.00821065	0.00807692	6.68604e-05	0.000600182
			rs8001962	90	0.984973	0.00725897	0.00712827	5.19455e-05	0.000587846
			rs8002031	95	0.984503	0.00749658	0.00735303	5.53981e-05	0.000592267
			rs8040826	89	0.985851	0.00679657	0.00677869	4.62055e-05	0.000527575
			rs8052201	170	0.976981	0.0111903	0.0109586	0.000124774	0.000745372
			rs8087408	92	0.985093	0.00720914	0.00707991	5.12461e-05	0.000566339
			rs8089286	101	0.984347	0.00754897	0.00747562	5.67591e-05	0.000571501
			rs8099023	101	0.984225	0.00759722	0.00754016	5.76223e-05	0.000580144
			rs8099130	145	0.98053	0.00942218	0.00933635	8.90934e-05	0.000622061
			rs8127316	96	0.984154	0.00764116	0.00753521	5.78931e-05	0.000611678
			rs8191547	166	0.97669	0.0112368	0.011162	0.000127636	0.000783404
			rs8192827	87	0.985839	0.00680106	0.00677411	4.61933e-05	0.00053962
			rs860640	29	0.99427	0.00273893	0.00272425	7.24535e-06	0.000259166
			rs872872	67	0.988535	0.00551961	0.00545849	3.0021e-05	0.000457168
			rs875439	106	0.983268	0.00818265	0.00786109	6.47954e-05	0.000623803
			rs876255	154	0.978348	0.0104992	0.0103182	0.000110006	0.000724345
			rs890290	92	0.984206	0.00763946	0.00746264	5.72906e-05	0.000634887
			rs897187	136	0.979766	0.00981691	0.00960925	9.55687e-05	0.000712615
			rs909782	87	0.985648	0.00692721	0.00682392	4.74053e-05	0.000553768
			rs922955	98	0.984522	0.00748174	0.00736723	5.54129e-05	0.000573383
			rs9347883	97	0.98516	0.00716774	0.00708641	5.10241e-05	0.000534528
			rs9351099	115	0.98282	0.00833879	0.00816734	6.86915e-05	0.000604717
			rs9363575	131	0.980423	0.00943176	0.00936597	8.94118e-05	0.000689744
			rs9365901	183	0.974797	0.0121579	0.0120673	0.000149678	0.000828417
			rs937589	72	0.988512	0.00553184	0.00549725	3.03344e-05	0.000428918
			rs9389954	93	0.984663	0.00738751	0.00730322	5.4201e-05	0.000591989
			rs9395772	155	0.976749	0.011163	0.0111273	0.000126335	0.000834475
			rs9398363	81	0.986674	0.00640369	0.00636826	4.08181e-05	0.000513013
			rs9401158	88	0.986205	0.00664842	0.0065959	4.39591e-05	0.000506613
			rs941880	23	0.995373	0.00221955	0.00219061	4.67236e-06	0.000212414
			rs9504399	115	0.982572	0.00838953	0.00834478	7.06279e-05	0.000622598
			rs9508747	54	0.990574	0.00454086	0.0044836	2.01714e-05	0.000381674
			rs9513184	75	0.987099	0.00619872	0.00614779	3.80904e-05	0.000516091
			rs9530833	94	0.984084	0.00770525	0.00752048	5.82524e-05	0.000631919
			rs9532905	113	0.980535	0.00931068	0.00928277	8.73601e-05	0.000784509
			rs9533206	125	0.981325	0.00899946	0.00893263	8.12573e-05	0.000661316
			rs9546669	76	0.987013	0.00627076	0.00615992	3.86175e-05	0.000518183
			rs9574326	102	0.983014	0.00823951	0.00801394	6.6506e-05	0.000666018
			rs9574766	79	0.986373	0.0065414	0.00649575	4.25312e-05	0.000547177
			rs9603511	105	0.983049	0.00817975	0.00806262	6.64456e-05	0.000641814
			rs9617876	11	0.997791	0.00105487	0.0010521	1.01115e-06	0.000101135
			rs962789	115	0.982512	0.0084224	0.00836649	7.10925e-05	0.000627684
			rs9672326	93	0.984854	0.00734782	0.00716783	5.29002e-05	0.000577739
			rs9685506	50	0.991038	0.00431477	0.00425739	1.81645e-05	0.000371325
			rs9689446	88	0.985709	0.00687004	0.00683075	4.70644e-05	0.000543481
			rs974135	98	0.983928	0.00779853	0.00759737	5.95995e-05	0.000616646
			rs977515	70	0.987758	0.00586002	0.00585124	3.42166e-05	0.000496727
			rs980466	178	0.974958	0.0121013	0.0119515	0.000147501	0.000841966
			rs9838311	108	0.983485	0.00799872	0.00785631	6.32993e-05	0.000596326
			rs9862737	125	0.981388	0.00899436	0.00888204	8.07489e-05	0.000654441
			rs9865616	86	0.986237	0.00666008	0.00654242	4.36647e-05	0.000516389
			rs9890699	76	0.987443	0.00605477	0.00598214	3.61969e-05	0.000484227
			rs9944753	71	0.987739	0.00589326	0.00584054	3.43543e-05	0.000492802
			rs9957162	94	0.985304	0.00707405	0.00703282	4.99537e-05	0.000538838
			rs9995621	70	0.988239	0.00565921	0.00560854	3.16561e-05	0.000461595
M33178	2-methoxyacetaminophen sulfate	FTD	rs10027220	115	0.982953	0.00825895	0.00812503	6.76727e-05	0.000595304
			rs10044695	122	0.9809	0.00917686	0.0091336	8.47447e-05	0.000705153
			rs10060532	110	0.983268	0.00808283	0.00798405	6.50315e-05	0.000600457
			rs10120414	73	0.987932	0.00579247	0.00577667	3.34048e-05	0.000465116
			rs10131251	59	0.989147	0.00515462	0.0052092	2.66839e-05	0.000462104
			rs10157030	108	0.982966	0.00808378	0.00825225	6.7235e-05	0.000630339
			rs10229296	93	0.984957	0.00723371	0.00718569	5.22017e-05	0.000571382
			rs10274397	40	0.99258	0.00355198	0.0035385	1.23456e-05	0.000317068
			rs10276616	231	0.971373	0.0138467	0.0137314	0.000194885	0.000853714
			rs10415374	43	0.991965	0.00383298	0.00384215	1.45005e-05	0.000345689
			rs10447967	75	0.987762	0.00585702	0.00588053	3.44029e-05	0.000466152
			rs10486289	113	0.981536	0.00883189	0.00884628	7.8892e-05	0.000707108
			rs10494913	130	0.98004	0.00950731	0.00963657	9.27604e-05	0.000723486
			rs10783298	34	0.993783	0.00298099	0.00296552	8.63344e-06	0.000262039
			rs10830676	80	0.985879	0.00675867	0.00673815	4.56149e-05	0.000578319
			rs10842538	84	0.986167	0.0066376	0.00661911	4.40188e-05	0.000532462
			rs10917221	101	0.984015	0.00766457	0.00766797	5.91333e-05	0.000593069
			rs10922741	52	0.990421	0.00458011	0.00457065	2.07288e-05	0.000407731
			rs10961091	125	0.9817	0.00878071	0.00880637	7.81331e-05	0.000634508
			rs10962515	123	0.98062	0.00925488	0.00931808	8.72221e-05	0.000719886
			rs11019667	150	0.978956	0.0101555	0.0100806	0.000103871	0.000703739
			rs11038541	137	0.979314	0.0099644	0.00987964	9.97822e-05	0.000741933
			rs11041611	104	0.983655	0.00778654	0.00789163	6.18645e-05	0.000605046
			rs11067315	79	0.986755	0.00633045	0.00635616	4.02594e-05	0.000518007
			rs11112162	172	0.975981	0.0116368	0.01144	0.000135595	0.000806491
			rs11183923	137	0.979407	0.0099127	0.00985173	9.8981e-05	0.000729633
			rs11198080	104	0.983696	0.00781147	0.00782981	6.15753e-05	0.00060065
			rs11202938	161	0.977565	0.0107955	0.0107732	0.000118224	0.000748086
			rs11228559	89	0.986013	0.00672399	0.00670293	4.51945e-05	0.000515262
			rs11256010	161	0.977044	0.0109383	0.0111151	0.000123658	0.000779065
			rs11608731	100	0.983766	0.00775989	0.00779645	6.08812e-05	0.000616819
			rs11620793	96	0.985038	0.00718653	0.00717654	5.18108e-05	0.000547048
			rs1169758	101	0.984345	0.00755558	0.00747258	5.67878e-05	0.00056977
			rs1174851	112	0.982966	0.00815399	0.00820248	6.74319e-05	0.000610055
			rs11753364	152	0.978098	0.0105373	0.0104965	0.000112327	0.000755419
			rs11878031	77	0.986856	0.00624356	0.00633749	3.95721e-05	0.000523438
			rs11893311	61	0.989276	0.00511109	0.00515014	2.61712e-05	0.000436996
			rs11943366	69	0.988288	0.0056345	0.00558417	3.13747e-05	0.000462158
			rs11948317	54	0.989846	0.00488829	0.00480288	2.32789e-05	0.000439762
			rs11957930	111	0.983225	0.00805032	0.00806111	6.54039e-05	0.00059775
			rs11964805	97	0.982838	0.0082654	0.0081231	6.76072e-05	0.000705797
			rs12122792	91	0.985213	0.00711302	0.00706069	5.04139e-05	0.000562754
			rs12226635	173	0.976707	0.0112532	0.0111619	0.000127853	0.000749579
			rs12327061	56	0.989861	0.00484532	0.00484586	2.32961e-05	0.000424175
			rs12377744	104	0.984304	0.0075207	0.00756021	5.72071e-05	0.00055759
			rs12405026	77	0.986714	0.00635433	0.00635778	4.04101e-05	0.000533341
			rs12512668	109	0.981958	0.00856554	0.00870055	7.51934e-05	0.000700771
			rs12590150	96	0.983877	0.00772143	0.00770876	5.98653e-05	0.000632807
			rs12607891	67	0.988225	0.00564689	0.00561534	3.16058e-05	0.000481205
			rs12679602	75	0.987027	0.00620969	0.00620265	3.85011e-05	0.000521692
			rs12758010	87	0.985036	0.00716263	0.0071489	5.13816e-05	0.000601209
			rs12950011	128	0.981231	0.00911321	0.00892348	8.22275e-05	0.000649629
			rs12959082	86	0.985769	0.00681746	0.00681603	4.65883e-05	0.000550543
			rs13385838	17	0.996653	0.00160121	0.00159281	2.40841e-06	0.000150568
			rs13410411	130	0.979498	0.00984596	0.00979104	9.76523e-05	0.000767698
			rs1352545	120	0.982054	0.00874005	0.0084972	7.49893e-05	0.000633823
			rs1355540	147	0.977367	0.01078	0.0109082	0.000119488	0.000825383
			rs1358551	80	0.987123	0.00617638	0.00617826	3.81729e-05	0.000484184
			rs1368009	99	0.984821	0.00733162	0.0072475	5.34088e-05	0.000546127
			rs1398759	154	0.977314	0.0109098	0.0108626	0.000120467	0.000793095
			rs1444113	130	0.981409	0.00894364	0.00893793	8.0823e-05	0.000628899
			rs1472170	47	0.991729	0.00396005	0.00395855	1.54698e-05	0.000337046
			rs1472292	93	0.98471	0.00734151	0.00730631	5.3884e-05	0.000588174
			rs1510969	63	0.988776	0.00536463	0.00536727	2.86572e-05	0.000463012
			rs1636949	85	0.985164	0.00716353	0.00701927	5.04374e-05	0.000602551
			rs1645773	47	0.991427	0.00402925	0.00416699	1.65745e-05	0.00036055
			rs1676300	78	0.986913	0.0062729	0.00626278	3.92948e-05	0.000511916
			rs16837093	134	0.978467	0.0104336	0.0101722	0.000107648	0.00081995
			rs16854290	93	0.985403	0.00699728	0.00701345	4.92651e-05	0.000536864
			rs16856275	145	0.978017	0.0102205	0.0108545	0.000112637	0.000795344
			rs16856874	150	0.978492	0.0101796	0.010487	0.000108367	0.000733466
			rs16859878	71	0.987956	0.00573173	0.00580398	3.31977e-05	0.000474696
			rs16863208	56	0.989999	0.00476483	0.00480015	2.26897e-05	0.000413297
			rs16869484	145	0.97924	0.0100118	0.00993962	0.000100915	0.00070735
			rs16877016	75	0.987006	0.00619066	0.00624192	3.86273e-05	0.000523056
			rs16890511	91	0.98529	0.00704205	0.00706132	4.9912e-05	0.000556601
			rs16894341	74	0.988041	0.00574332	0.00573049	3.28583e-05	0.00045203
			rs16894361	131	0.98081	0.00923888	0.0091967	8.59611e-05	0.000668547
			rs16913175	94	0.9843	0.0075506	0.00747845	5.67532e-05	0.000614257
			rs16936983	131	0.980943	0.00915252	0.00916279	8.48347e-05	0.000657083
			rs16992346	142	0.980542	0.00936689	0.0093643	8.88172e-05	0.000637817
			rs17020850	98	0.983441	0.00790916	0.00793002	6.31189e-05	0.000657002
			rs17027182	58	0.989298	0.00509287	0.0051274	2.59401e-05	0.000455546
			rs17079498	161	0.97657	0.011252	0.0112391	0.000128686	0.000810542
			rs17088496	116	0.982586	0.00837244	0.00835495	7.05746e-05	0.000616474
			rs17093221	160	0.976905	0.011102	0.0110741	0.000125058	0.000793823
			rs17098188	158	0.976587	0.0111946	0.0112644	0.000128297	0.000826186
			rs17100461	142	0.97975	0.00975543	0.00971148	9.60106e-05	0.000687112
			rs17108927	129	0.980916	0.00913471	0.00919576	8.49668e-05	0.000668069
			rs17119874	141	0.977972	0.0104759	0.0106249	0.000112998	0.000814351
			rs17140558	116	0.982283	0.00853219	0.00847137	7.29424e-05	0.000640634
			rs17154872	123	0.981483	0.0088633	0.00891409	7.9839e-05	0.000659865
			rs17164003	117	0.982208	0.00851228	0.00856837	7.36197e-05	0.00063792
			rs17167552	83	0.986694	0.00638403	0.00638251	4.07969e-05	0.00049866
			rs17181818	59	0.990062	0.0047576	0.00476851	2.25251e-05	0.000389297
			rs17263168	114	0.981838	0.00870946	0.00869624	7.64605e-05	0.000680082
			rs17291576	177	0.976171	0.0114339	0.0114904	0.000133816	0.000771102
			rs17408309	87	0.9859	0.00675713	0.00676234	4.58128e-05	0.000534687
			rs17576178	208	0.972561	0.013227	0.0131651	0.000178179	0.000868545
			rs17653246	138	0.979905	0.00969871	0.00960946	9.44185e-05	0.000691984
			rs17680579	107	0.983329	0.00801293	0.0079824	6.44355e-05	0.000611345
			rs17721790	83	0.986653	0.00638574	0.00641649	4.10248e-05	0.00050344
			rs17782421	107	0.982611	0.00832767	0.00832478	6.98859e-05	0.000666935
			rs17829368	83	0.986731	0.00634009	0.00639143	4.05706e-05	0.000496584
			rs17863803	227	0.970215	0.0142121	0.0144141	0.000210195	0.000948476
			rs1791280	115	0.982691	0.00836123	0.00826161	6.96774e-05	0.000616562
			rs1800777	126	0.981135	0.00902146	0.00909221	8.29341e-05	0.000667948
			rs1865893	90	0.985314	0.00703393	0.00704128	4.9705e-05	0.000561106
			rs1891251	140	0.979226	0.00994732	0.00999491	0.000100801	0.000730694
			rs1929543	87	0.985491	0.00694172	0.00695353	4.84147e-05	0.000565404
			rs2047682	53	0.990633	0.00449086	0.00447264	1.98926e-05	0.000383358
			rs2053450	150	0.979097	0.0100905	0.0100148	0.000102517	0.000695005
			rs2121016	156	0.977532	0.010845	0.0107371	0.000118352	0.000767563
			rs2145526	151	0.977737	0.0106387	0.010728	0.00011595	0.000780364
			rs2177959	112	0.982617	0.00836936	0.00830838	7.0131e-05	0.000634885
			rs2235380	87	0.985386	0.00701563	0.00697592	4.90929e-05	0.000573392
			rs2236217	127	0.980325	0.00946596	0.00940152	9.00629e-05	0.000717612
			rs2249531	112	0.983364	0.00797792	0.00801266	6.44245e-05	0.000581334
			rs2250600	53	0.990522	0.00451916	0.00454645	2.03505e-05	0.000392247
			rs2299161	87	0.985939	0.00675338	0.00672904	4.55588e-05	0.000533122
			rs231966	119	0.981016	0.0090755	0.00911294	8.35931e-05	0.000711798
			rs2361394	85	0.986113	0.00667884	0.00663355	4.43985e-05	0.000529857
			rs2410660	218	0.971621	0.013682	0.0136189	0.000190888	0.000887708
			rs2429980	53	0.990088	0.00475499	0.00470765	2.2182e-05	0.000426925
			rs247858	279	0.967403	0.0158307	0.0155799	0.000254018	0.000932123
			rs2647998	113	0.982219	0.00851001	0.00853861	7.33196e-05	0.000659475
			rs2760672	123	0.980579	0.00929308	0.00931849	8.75908e-05	0.000721757
			rs2802568	77	0.986449	0.00643903	0.00651713	4.19873e-05	0.000553249
			rs288438	62	0.989325	0.00509909	0.00512287	2.59767e-05	0.000427157
			rs2891717	11	0.997742	0.0010777	0.0010737	1.05428e-06	0.000105465
			rs3026770	81	0.986893	0.00626793	0.00630434	3.95447e-05	0.00049525
			rs305550	78	0.986353	0.00653921	0.00651063	4.26089e-05	0.000554577
			rs310907	87	0.984977	0.00716544	0.00720193	5.17886e-05	0.0006035
			rs3169950	53	0.990573	0.00449259	0.00452644	2.01409e-05	0.000388029
			rs3219080	86	0.986053	0.00672496	0.00664918	4.48198e-05	0.000528171
			rs323090	191	0.970606	0.014061	0.0140533	0.00020251	0.00107741
			rs35875280	161	0.978343	0.0104751	0.0103721	0.000110354	0.000699624
			rs3763903	80	0.986514	0.00634732	0.00656766	4.17277e-05	0.00052925
			rs3777914	93	0.984938	0.00719424	0.00724527	5.23509e-05	0.000570463
			rs3780205	81	0.986876	0.00634841	0.0062372	3.96245e-05	0.000498323
			rs3811321	160	0.978082	0.0104964	0.0105934	0.000112969	0.000715617
			rs3814168	95	0.985005	0.00716849	0.00721977	5.1988e-05	0.000554737
			rs3821143	95	0.984352	0.00745809	0.00752983	5.64472e-05	0.00060365
			rs3889670	107	0.983572	0.00791239	0.0078584	6.26224e-05	0.000594936
			rs4130875	87	0.985748	0.00681351	0.00684505	4.67668e-05	0.000546272
			rs421380	100	0.984266	0.00754565	0.00754969	5.72964e-05	0.000581648
			rs4242763	136	0.980084	0.00958102	0.00954988	9.26643e-05	0.000692576
			rs42441	111	0.982523	0.00837132	0.00838792	7.08201e-05	0.000646877
			rs4244278	80	0.986034	0.00670562	0.00664943	4.4654e-05	0.000566017
			rs4246023	163	0.976954	0.0111418	0.011002	0.000124696	0.00077712
			rs4294438	42	0.992049	0.00381484	0.00377576	1.41729e-05	0.00034647
			rs4313653	142	0.979671	0.00974073	0.00980005	9.67491e-05	0.000691407
			rs4333550	88	0.985343	0.00701805	0.00701678	4.94037e-05	0.000572896
			rs436268	180	0.973689	0.0126149	0.0126191	0.000162575	0.000914313
			rs4427044	125	0.981118	0.00908673	0.00903873	8.30398e-05	0.00067338
			rs4441723	56	0.990154	0.00473665	0.00468681	2.20197e-05	0.000400783
			rs4453029	57	0.989989	0.00482213	0.00475823	2.27694e-05	0.000407392
			rs4507748	89	0.985774	0.00679903	0.00684628	4.66859e-05	0.000533879
			rs4545881	76	0.987634	0.00591749	0.00594335	3.51404e-05	0.000469618
			rs4599300	96	0.984763	0.00729378	0.0073219	5.3663e-05	0.000567605
			rs465409	123	0.980143	0.00937013	0.00964006	9.14035e-05	0.00075503
			rs4670236	157	0.978289	0.0104944	0.0103894	0.000110734	0.000716928
			rs4678695	81	0.986223	0.00658251	0.00660522	4.35408e-05	0.000545477
			rs4766348	142	0.979583	0.00979528	0.00982612	9.75579e-05	0.000697791
			rs4810592	113	0.98236	0.00850391	0.00841462	7.21929e-05	0.000649176
			rs4847371	88	0.985371	0.00699692	0.00701455	4.92409e-05	0.000567955
			rs4928021	143	0.979761	0.00970116	0.0097604	9.5962e-05	0.000681085
			rs4961483	217	0.97317	0.0129935	0.0128682	0.000171016	0.000797103
			rs4964992	83	0.986023	0.00674211	0.00664107	4.48605e-05	0.000548952
			rs4982501	129	0.981107	0.00911981	0.00903321	8.33111e-05	0.00065645
			rs545142	99	0.980692	0.00933551	0.00901944	8.49911e-05	0.000867732
			rs588113	54	0.989598	0.00495898	0.00495826	2.43859e-05	0.000460502
			rs6006868	215	0.972762	0.0131423	0.0130872	0.00017598	0.000832022
			rs6041405	122	0.981588	0.00883723	0.00884086	7.8939e-05	0.000655326
			rs6136119	141	0.980177	0.00946353	0.00960696	9.20941e-05	0.000660231
			rs6137014	57	0.990102	0.00474124	0.00473539	2.2277e-05	0.000399089
			rs628495	95	0.984141	0.00759958	0.00758104	5.79204e-05	0.000620694
			rs633810	98	0.984812	0.00728508	0.00729738	5.34299e-05	0.000552013
			rs6436032	53	0.990753	0.00440491	0.00444845	1.9404e-05	0.000373918
			rs6495823	75	0.986531	0.00644195	0.00642451	4.13907e-05	0.000560691
			rs6500125	119	0.982063	0.0086966	0.00852715	7.48737e-05	0.000637887
			rs6534458	106	0.982342	0.00837593	0.00852107	7.19655e-05	0.000689254
			rs653513	113	0.982941	0.00817342	0.00821117	6.7671e-05	0.000607017
			rs654974	60	0.988912	0.00526046	0.00532627	2.78593e-05	0.000473442
			rs6561867	63	0.989185	0.00517441	0.00518329	2.66827e-05	0.000430988
			rs6578873	94	0.985482	0.0069615	0.00698192	4.87952e-05	0.000525424
			rs6664636	97	0.984813	0.00729683	0.00727898	5.33747e-05	0.000557906
			rs6677918	105	0.983769	0.00783026	0.00775072	6.11023e-05	0.00058913
			rs6693659	78	0.986764	0.00634081	0.00633188	4.01647e-05	0.000523051
			rs6734884	147	0.977797	0.0106292	0.0106586	0.000115065	0.000800036
			rs674341	150	0.976628	0.0111915	0.011191	0.00012738	0.000861869
			rs6750825	93	0.985297	0.00703628	0.00706908	4.99343e-05	0.000547904
			rs6798383	153	0.978512	0.0103792	0.0102831	0.000108357	0.000717158
			rs6851302	99	0.982654	0.00830018	0.00826601	6.91097e-05	0.000710793
			rs6873660	68	0.987919	0.00566858	0.00588094	3.3246e-05	0.000498254
			rs696686	94	0.984731	0.00732198	0.00731036	5.37738e-05	0.000582456
			rs7015641	110	0.983379	0.0079914	0.00797486	6.42166e-05	0.000590963
			rs7028666	112	0.981828	0.0087028	0.00869999	7.64229e-05	0.000692657
			rs7030552	107	0.982681	0.00826223	0.00832974	6.93771e-05	0.000658118
			rs7036654	67	0.988813	0.00538573	0.0053362	2.86279e-05	0.00043655
			rs7089115	107	0.983144	0.00801831	0.00814644	6.58153e-05	0.000625334
			rs712404	148	0.978029	0.0105557	0.0105279	0.000112851	0.000774546
			rs7305247	132	0.980652	0.00933438	0.00925297	8.74019e-05	0.00067283
			rs7315726	132	0.979487	0.0098778	0.00978661	9.79437e-05	0.000751023
			rs733501	155	0.978229	0.010535	0.0103955	0.000111224	0.000729486
			rs734054	112	0.982172	0.00847938	0.00860827	7.36506e-05	0.000667107
			rs7533400	92	0.984894	0.0072604	0.00721181	5.2583e-05	0.000580725
			rs7565704	73	0.987929	0.00579302	0.00577949	3.34246e-05	0.0004652
			rs757128	141	0.97933	0.00998199	0.00986862	9.98685e-05	0.000719036
			rs7599592	122	0.980731	0.00921142	0.00925309	8.61904e-05	0.0007184
			rs7622961	113	0.982822	0.00827648	0.0082167	6.85779e-05	0.000616073
			rs7643344	188	0.976005	0.0115508	0.0115736	0.000136236	0.000734835
			rs7674006	102	0.983921	0.00776395	0.0076597	5.98456e-05	0.000595776
			rs7701941	134	0.979822	0.00967585	0.00968634	9.49328e-05	0.000720822
			rs7755459	108	0.983279	0.00801549	0.0080313	6.48598e-05	0.000609828
			rs7800783	185	0.974364	0.0122678	0.0123644	0.000154826	0.000848784
			rs7822943	138	0.979208	0.00997824	0.00996947	0.000100847	0.000742987
			rs7854415	141	0.979144	0.00996771	0.010055	0.000101629	0.000731314
			rs7862319	132	0.980852	0.00923172	0.00917138	8.56611e-05	0.000659357
			rs7912365	121	0.981683	0.00879686	0.00878808	7.80961e-05	0.000653965
			rs7942841	186	0.97532	0.0118754	0.0118801	0.00014387	0.000780487
			rs8001962	81	0.986271	0.00660981	0.00653189	4.32319e-05	0.000543654
			rs8089286	103	0.983991	0.00769128	0.00767237	5.93842e-05	0.000586197
			rs8192827	85	0.986085	0.00667286	0.00666467	4.45671e-05	0.000532891
			rs875439	101	0.983861	0.00788158	0.00759015	6.01965e-05	0.000607179
			rs876255	146	0.979199	0.0100186	0.00997845	0.000101391	0.000702606
			rs890290	68	0.98803	0.0057678	0.00568041	3.26709e-05	0.000489525
			rs897187	119	0.981476	0.00886105	0.00890277	7.96967e-05	0.000680044
			rs9351099	115	0.982593	0.0083246	0.00839083	7.0467e-05	0.000620659
			rs9365901	177	0.975047	0.0118847	0.0120821	0.000146428	0.000839518
			rs937589	69	0.988781	0.00537013	0.00539348	2.8866e-05	0.000426291
			rs9389954	83	0.986162	0.00668971	0.00656669	4.40078e-05	0.000537862
			rs9401158	88	0.986088	0.00666325	0.00668852	4.46808e-05	0.000515305
			rs9504399	112	0.982819	0.00822945	0.00826229	6.85617e-05	0.000621131
			rs9513184	75	0.987039	0.00619712	0.00620428	3.84326e-05	0.000520957
			rs9530833	78	0.986588	0.00641821	0.00641467	4.11921e-05	0.000538313
			rs9546669	76	0.98698	0.00627212	0.00618903	3.881e-05	0.000520359
			rs9603511	100	0.983761	0.00781495	0.00774502	6.09083e-05	0.000617748
			rs9637871	135	0.980124	0.00951075	0.0095798	9.22651e-05	0.000693621
			rs9672326	92	0.984666	0.00733854	0.00734316	5.41294e-05	0.000597846
			rs9685506	36	0.993215	0.00323801	0.00324262	1.02775e-05	0.000293832
			rs9689446	84	0.986168	0.00660392	0.00665249	4.40167e-05	0.00053201
			rs974135	89	0.985068	0.0071863	0.00710918	5.12782e-05	0.000584863
			rs980466	171	0.97561	0.0116373	0.0117824	0.000139713	0.000830408
			rs9862737	108	0.983299	0.00801527	0.00801399	6.47183e-05	0.000606957
			rs9865616	85	0.986325	0.00659134	0.00652471	4.30875e-05	0.000515361
			rs9957162	91	0.985404	0.006861	0.00713812	4.91524e-05	0.000547603
M32846	X-11529	FTD	rs10107576	417	0.957687	0.0203495	0.0204678	0.000433849	0.00106196
			rs10505870	109	0.98089	0.00976254	0.00848475	8.36672e-05	0.000779287
			rs10520327	81	0.986409	0.00653046	0.00648686	4.24147e-05	0.000531158
			rs11029704	94	0.985009	0.00718157	0.0071978	5.19181e-05	0.000560198
			rs11045824	136	0.968408	0.0201313	0.00975775	0.000201343	0.00150173
			rs11190378	60	0.98972	0.00493554	0.00491071	2.40793e-05	0.000409415
			rs12533589	89	0.98584	0.00677726	0.00680886	4.62804e-05	0.000527863
			rs12565684	20	0.996122	0.00184895	0.00185342	3.26819e-06	0.000172039
			rs12762549	76	0.987345	0.00601002	0.00611677	3.67417e-05	0.000491369
			rs1391988	129	0.980697	0.00925952	0.00927516	8.68927e-05	0.000681222
			rs16902795	100	0.984025	0.00766184	0.0076535	5.89916e-05	0.000600276
			rs17617462	80	0.986775	0.00642036	0.00625427	4.01825e-05	0.000510374
			rs4149056	137	0.969057	0.0194403	0.00985452	0.00019624	0.00145161
			rs4721104	183	0.975296	0.0118543	0.0119117	0.000143988	0.000793947
			rs4762836	165	0.977078	0.0110277	0.0110116	0.000123523	0.000758757
			rs7138177	147	0.96968	0.0182581	0.010514	0.000196617	0.00135098
			rs7150683	73	0.987359	0.00604367	0.0060519	3.6535e-05	0.000508949
			rs8187710	71	0.987856	0.00576616	0.00586111	3.37285e-05	0.000483029
			rs974453	81	0.986951	0.00622038	0.00629706	3.91955e-05	0.000492545
M35187	X-13429	FTD	rs10505870	109	0.981955	0.00878714	0.00848364	7.52182e-05	0.000698716
			rs11045823	136	0.978265	0.0109581	0.00985238	0.000109547	0.000815386
			rs12160763	41	0.992492	0.00358826	0.00358987	1.26618e-05	0.000317011
			rs12317268	149	0.976771	0.0118802	0.0103712	0.00012529	0.00085211
			rs13276952	83	0.986706	0.00640212	0.00635393	4.07292e-05	0.000497453
			rs296381	86	0.986154	0.00665426	0.00662616	4.41903e-05	0.000520899
			rs4084390	86	0.985677	0.00688475	0.00683477	4.71833e-05	0.000556229
			rs8063217	53	0.990571	0.0045035	0.00451687	2.0147e-05	0.000388381
			rs932055	66	0.987344	0.00604456	0.00601701	3.62782e-05	0.000558215
